# Supplementary material for: Metaeffector interactions modulate the type III effector-triggered immunity load of Pseudomonas syringae
Source: PubMed Central journal article supplement (PMC9135338; doi:10.1371/journal.ppat.1010541), 2022-05-16

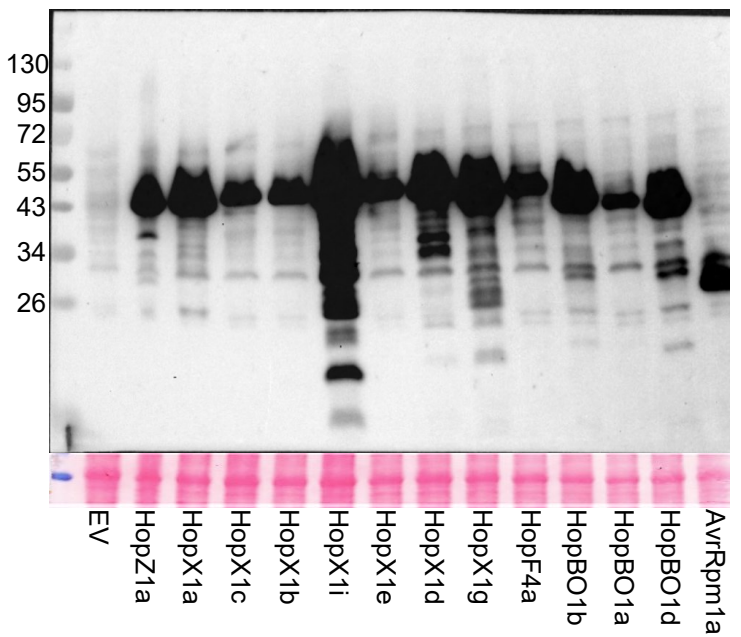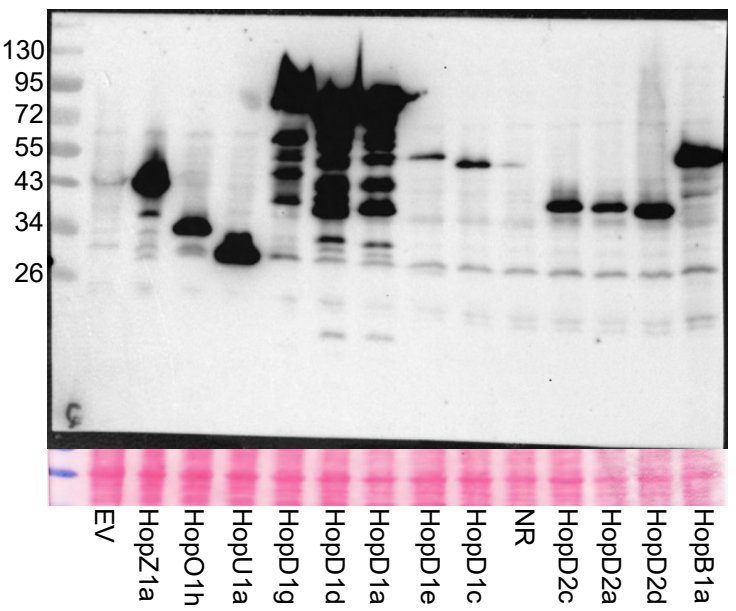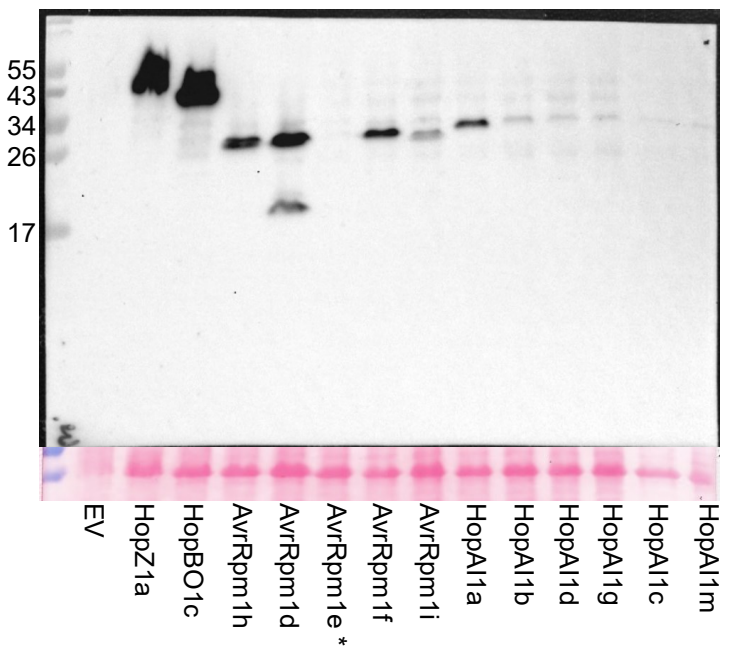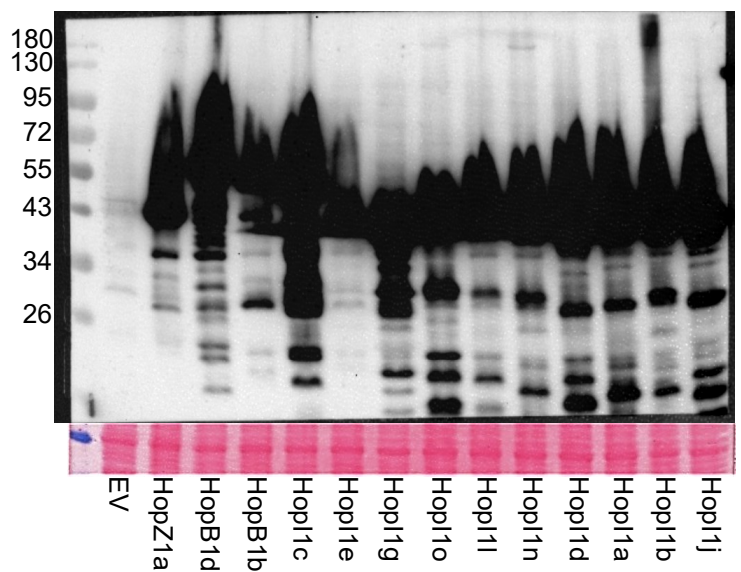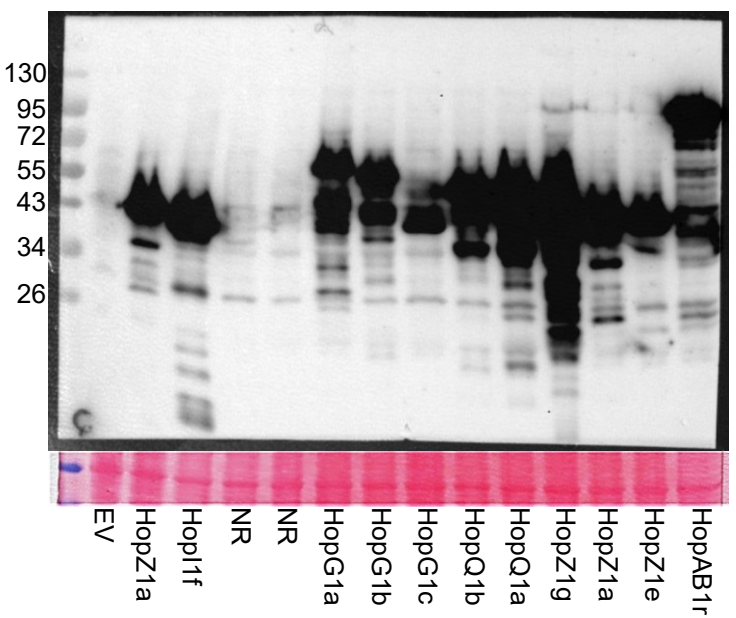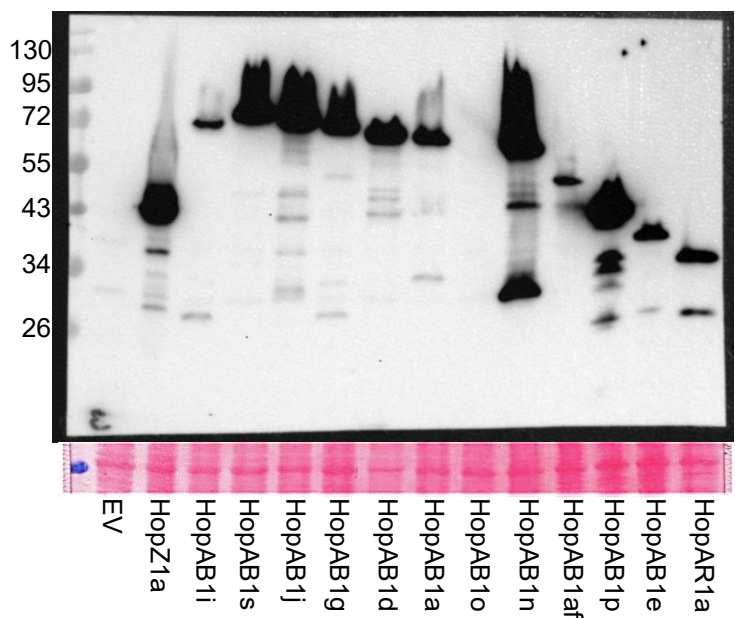

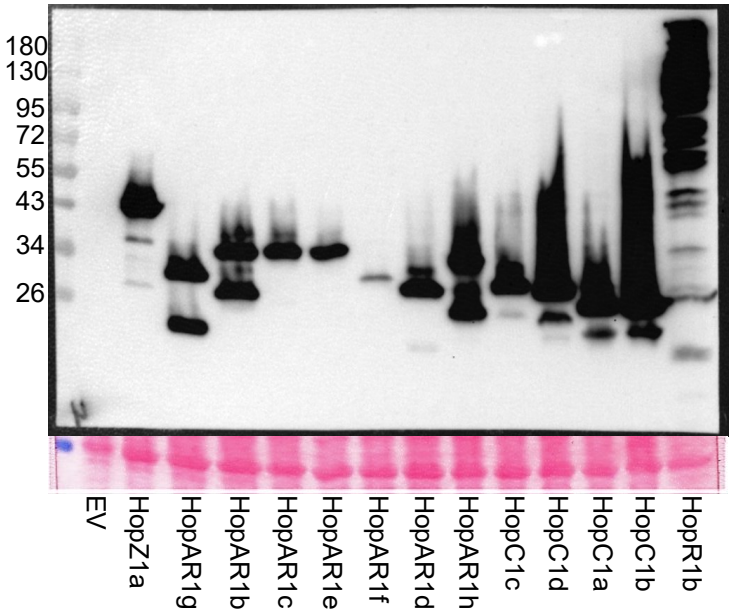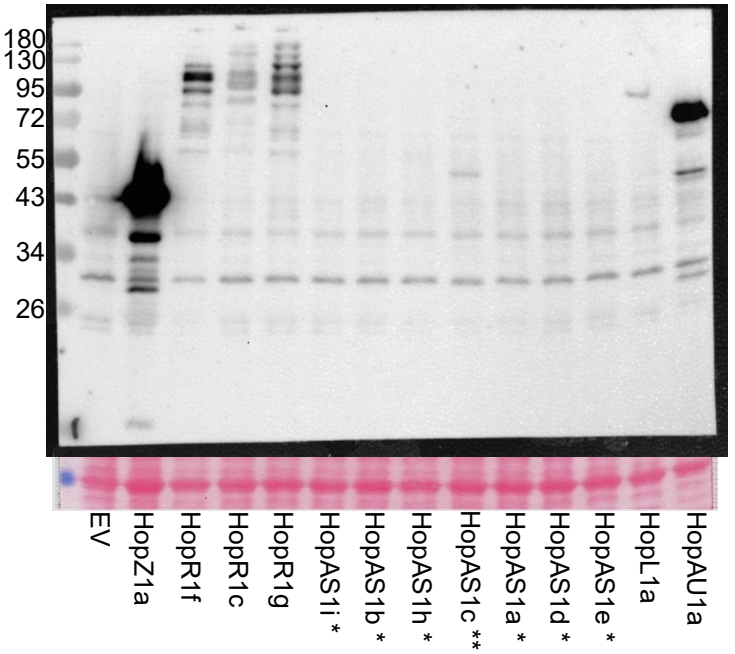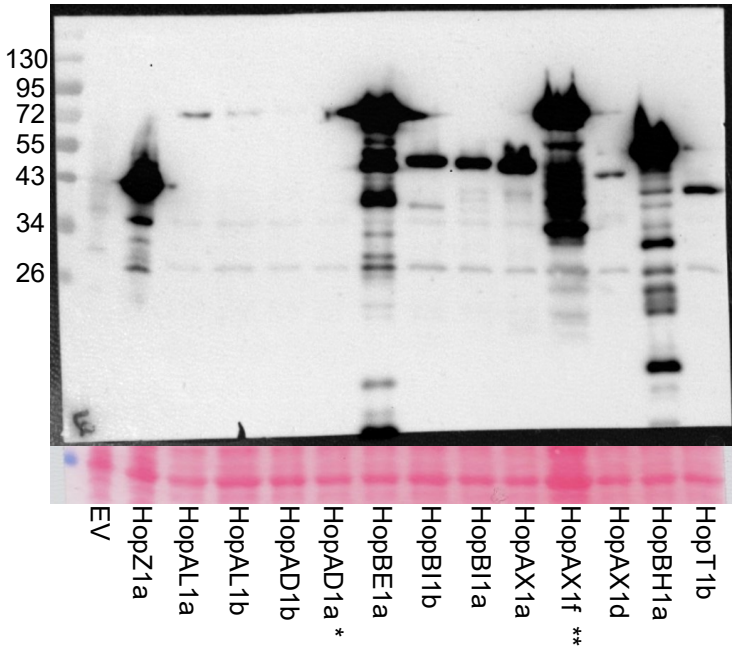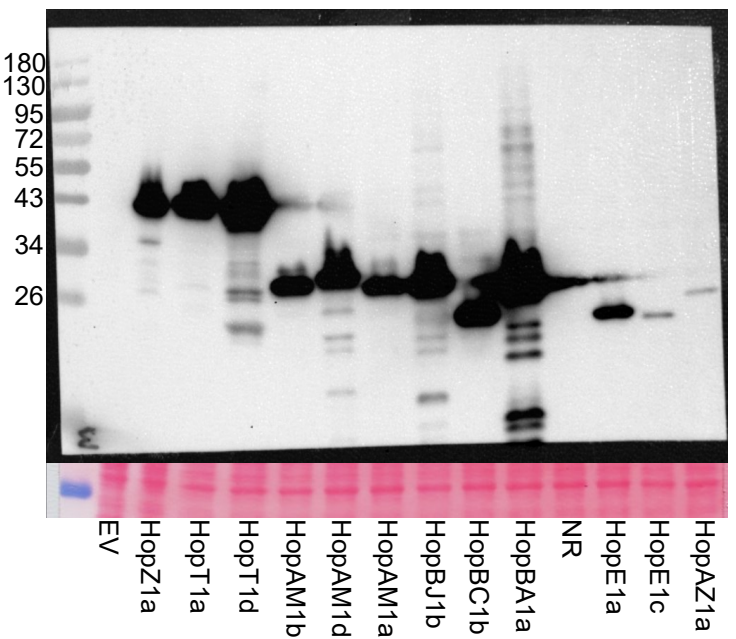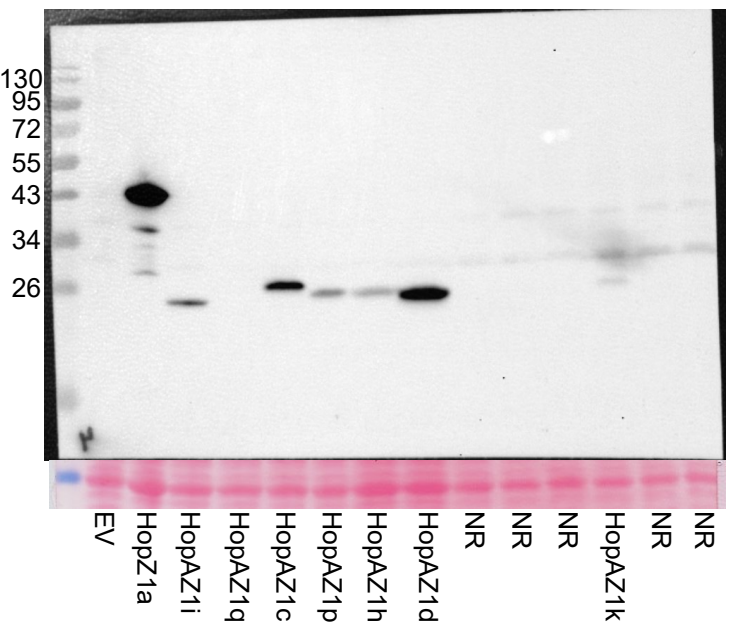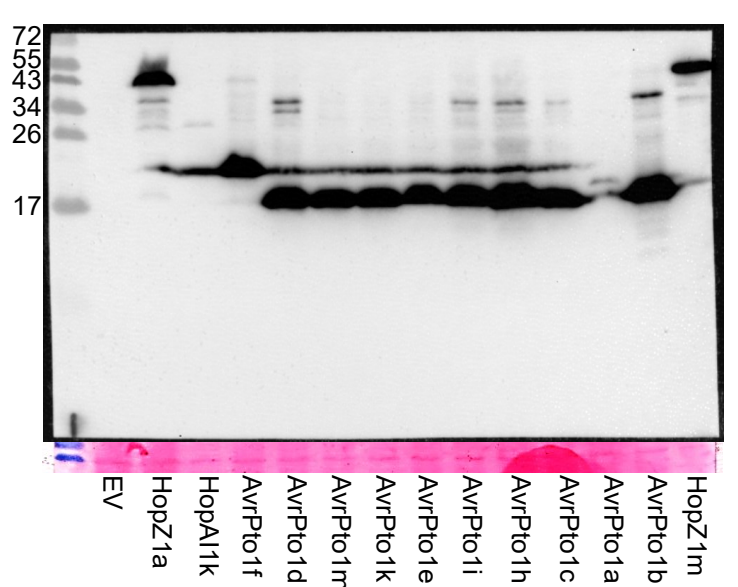

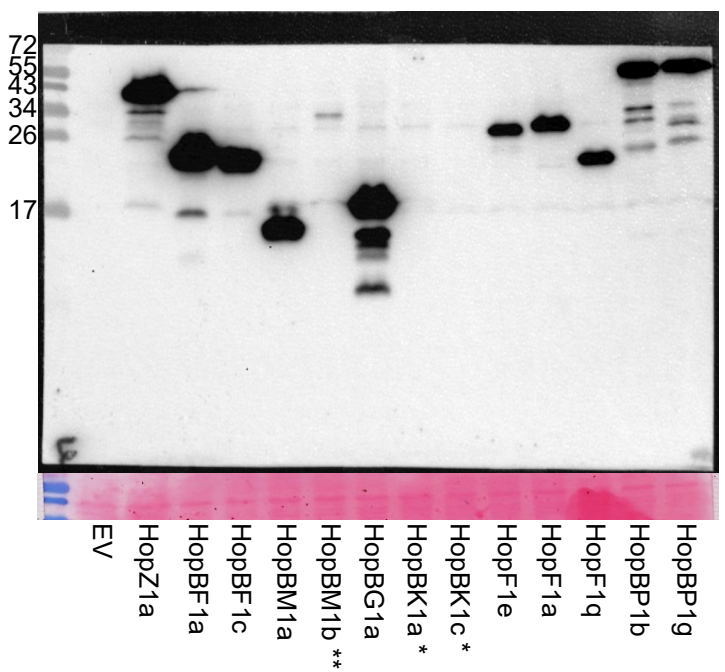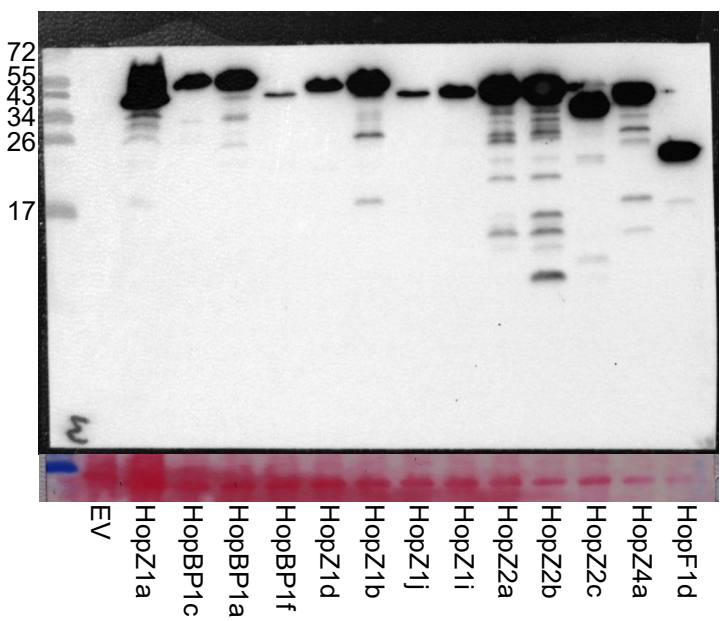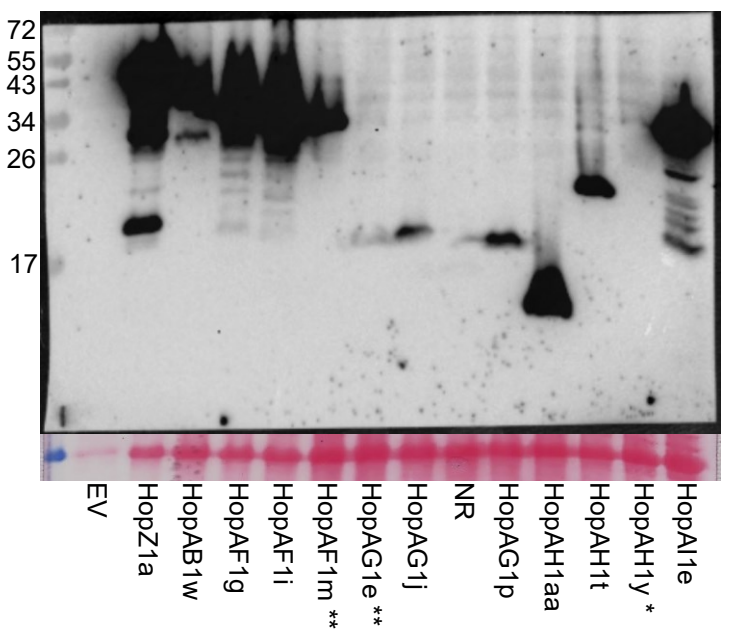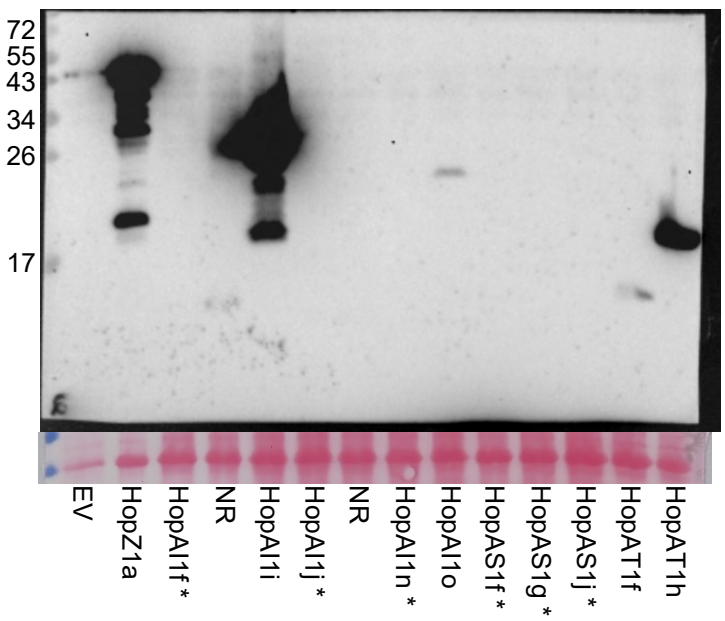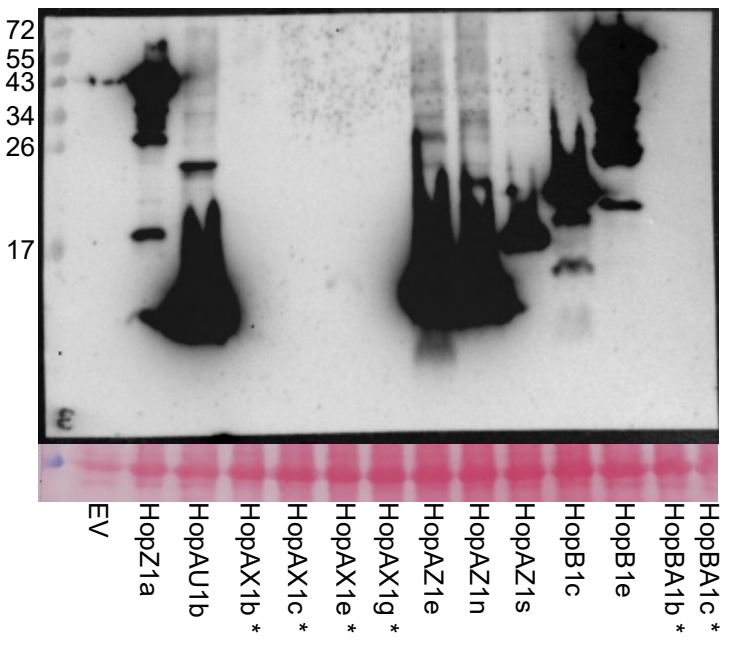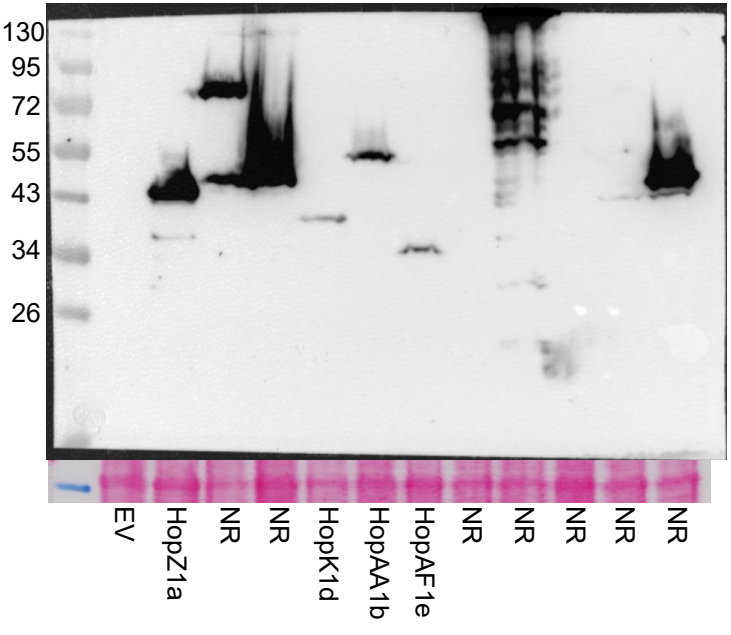

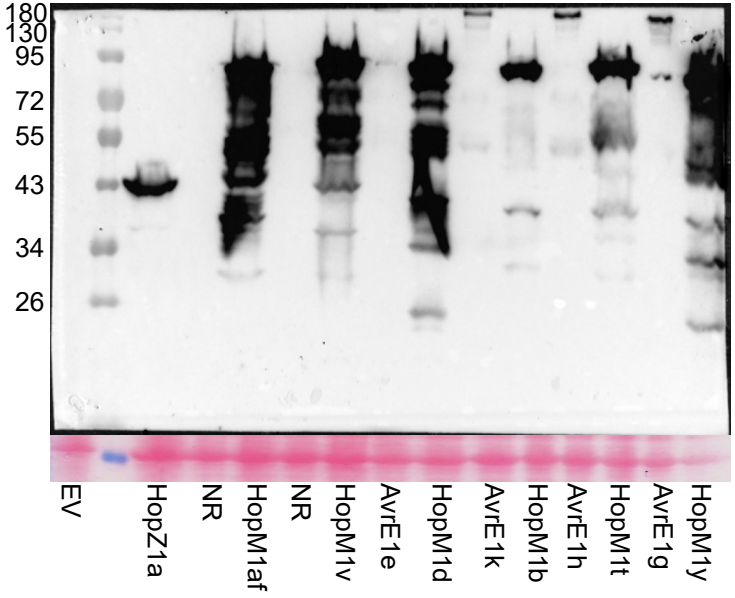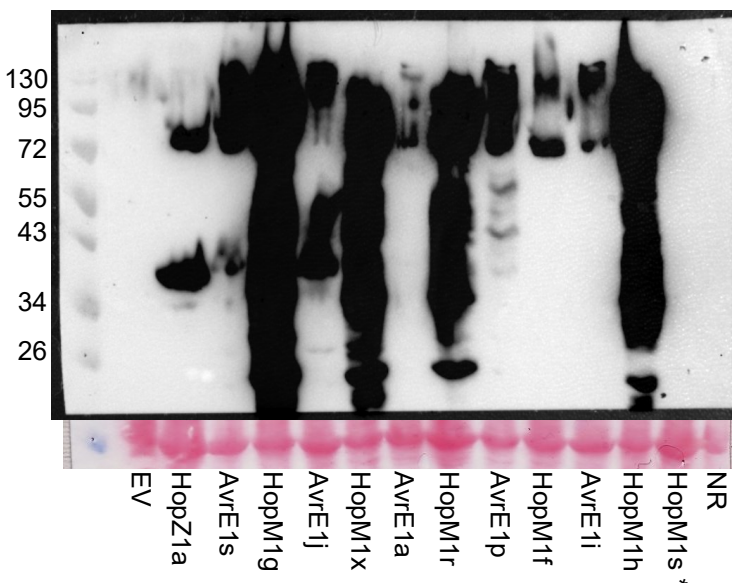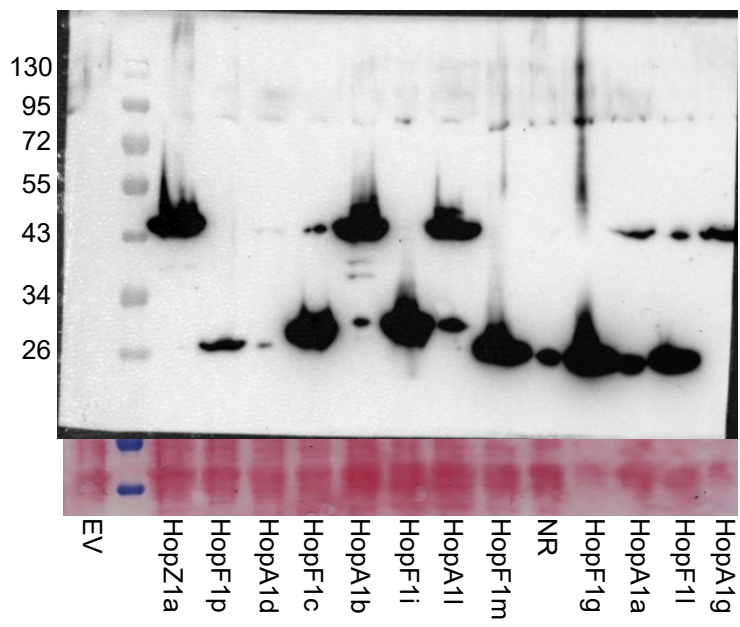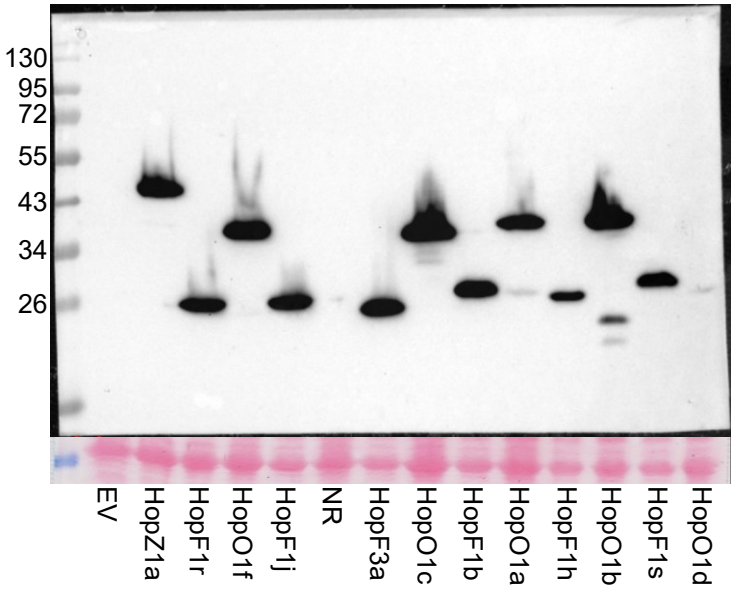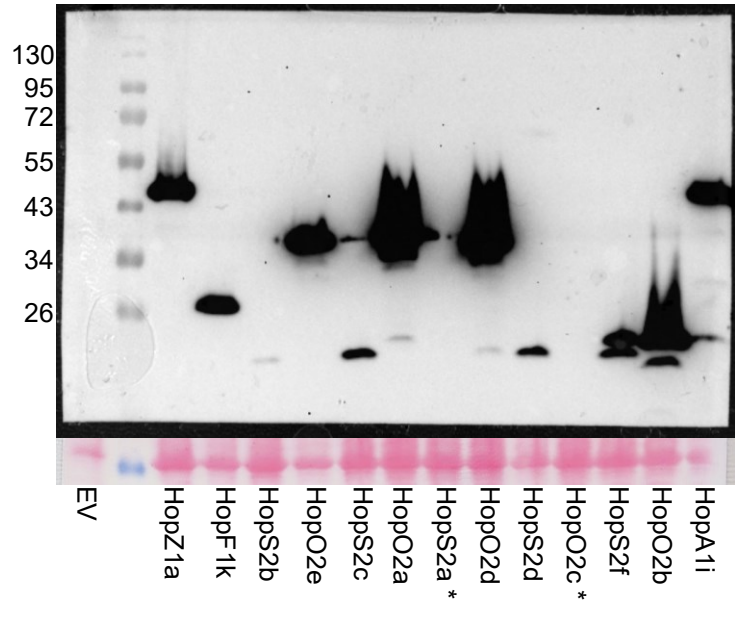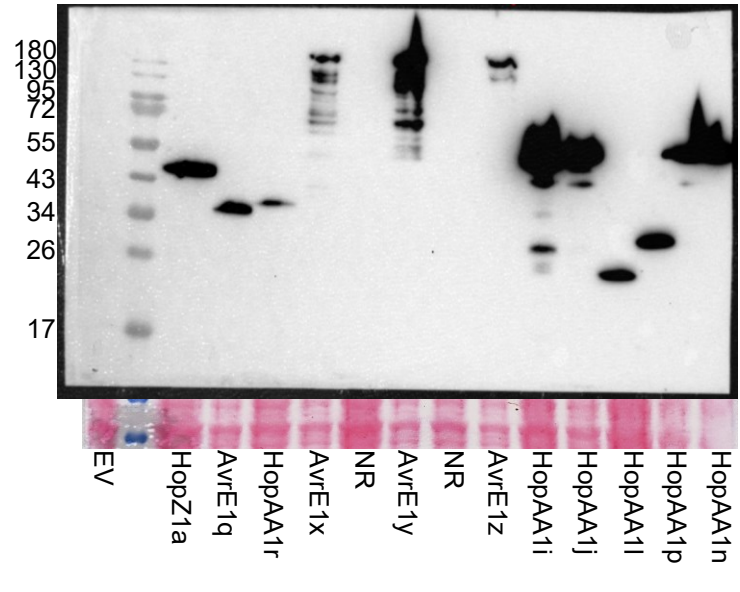

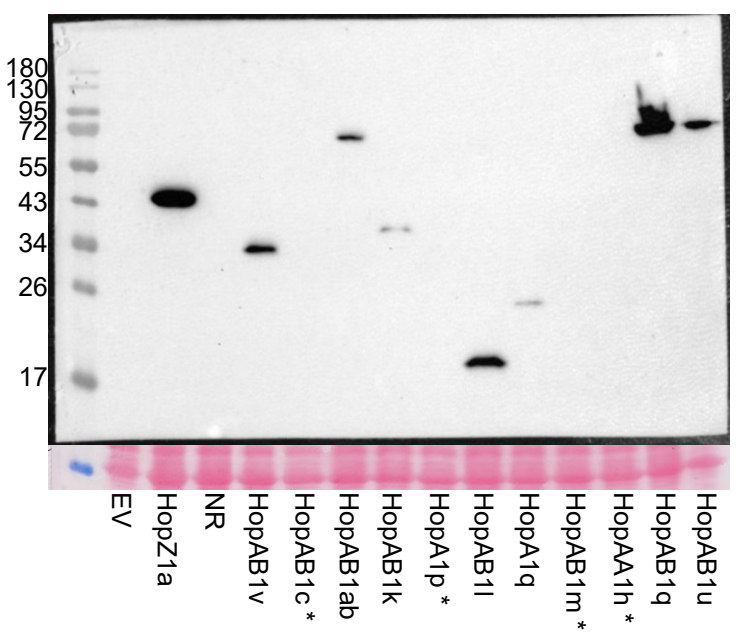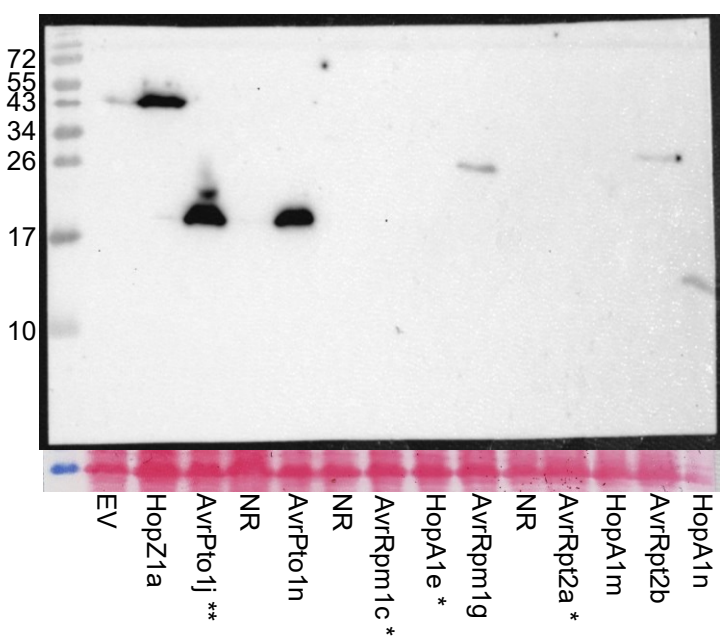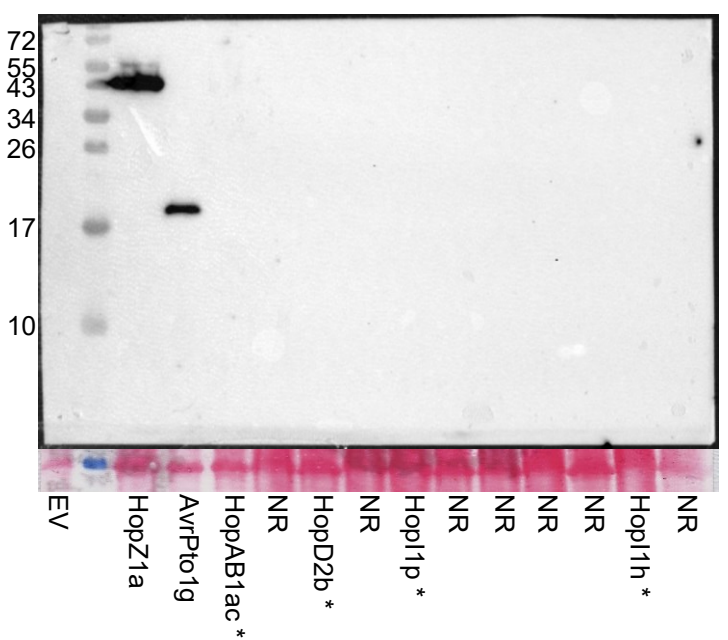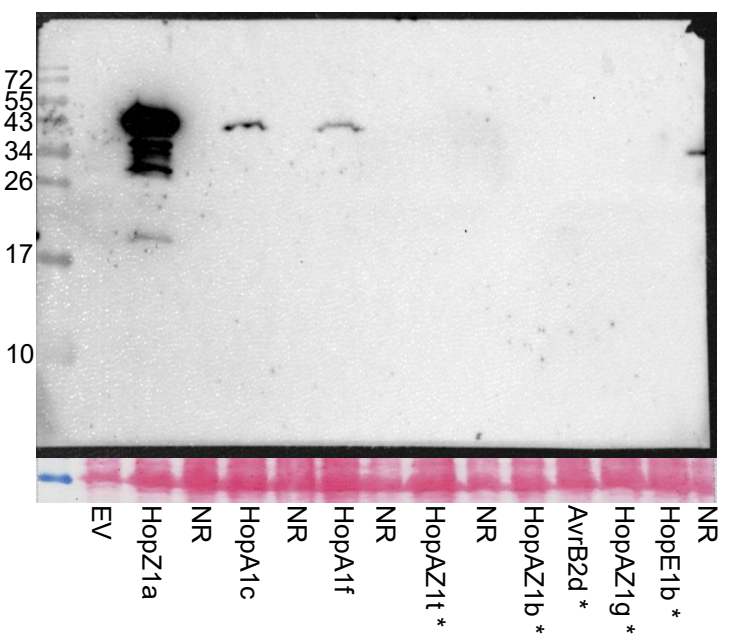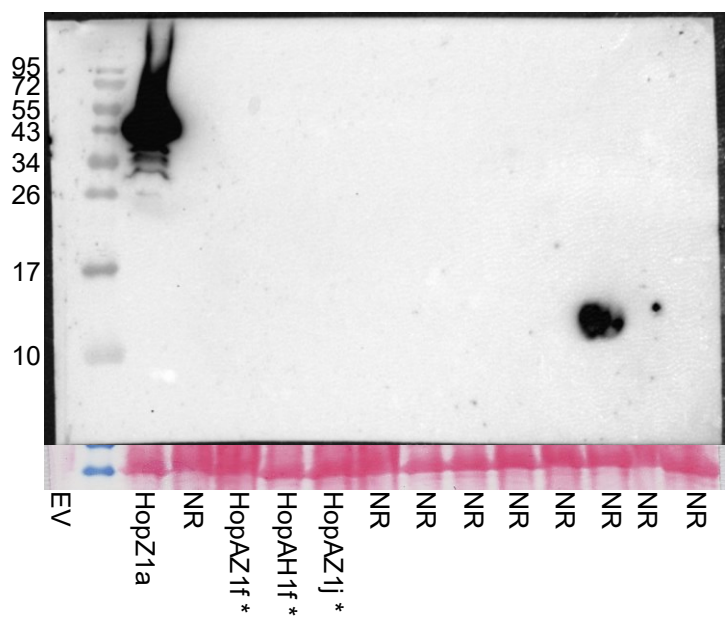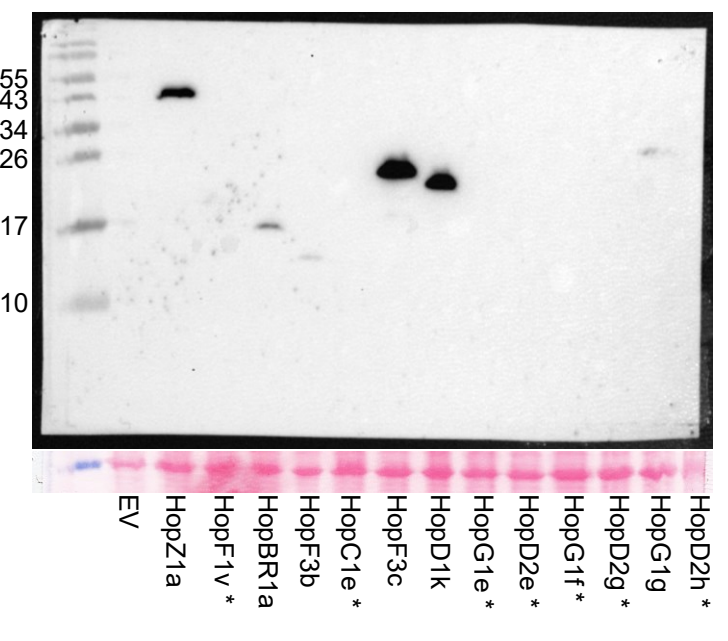

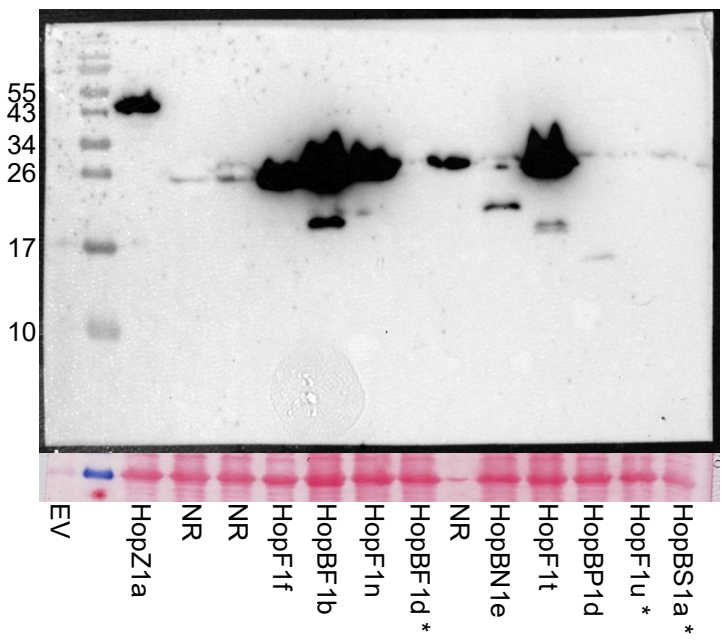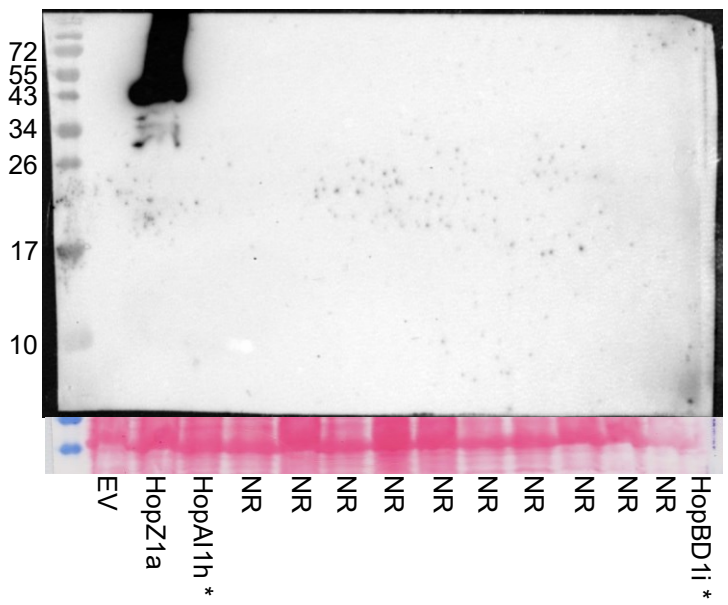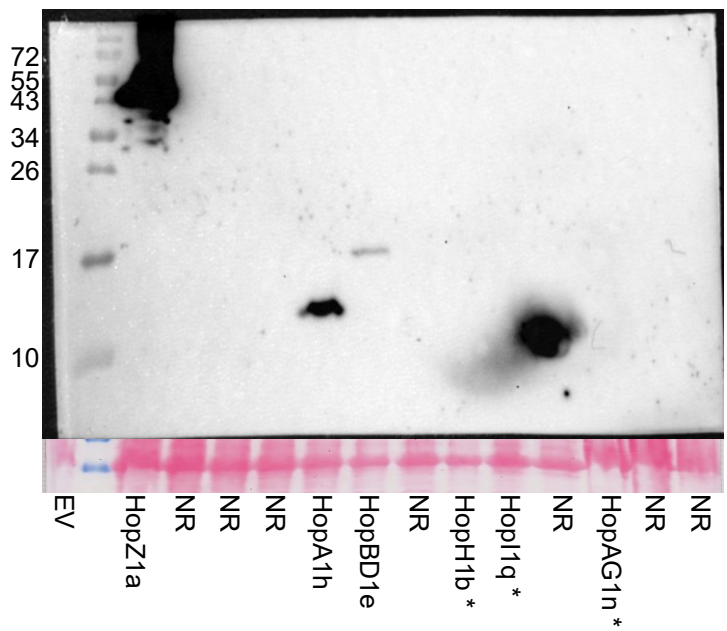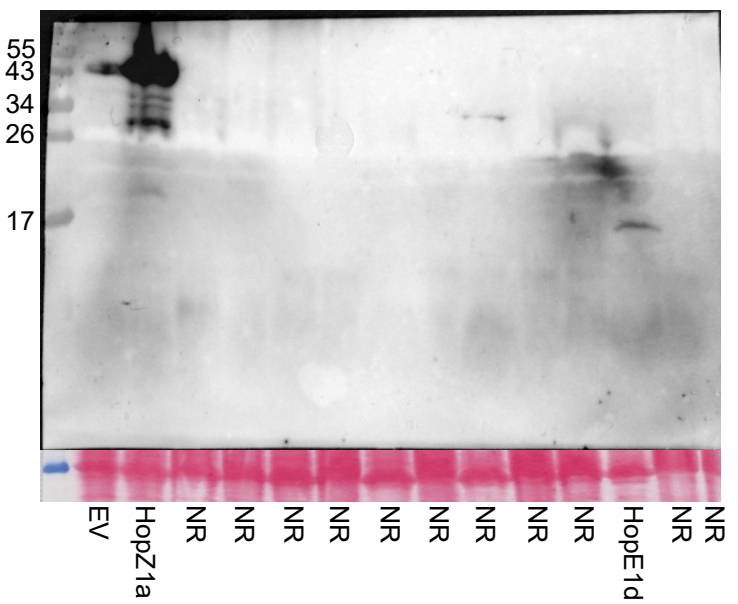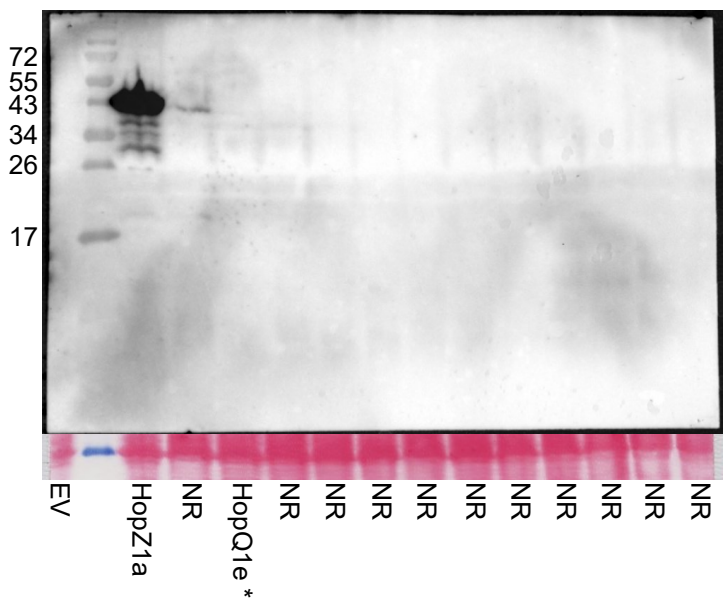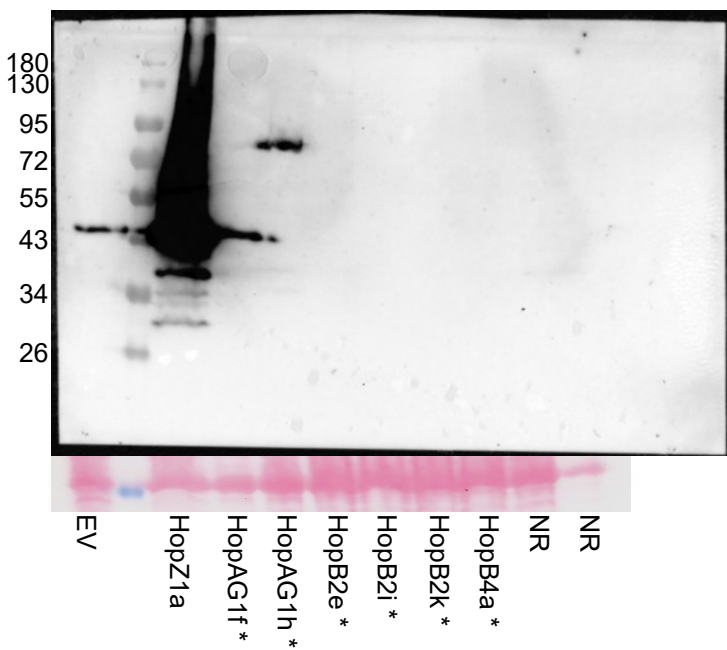

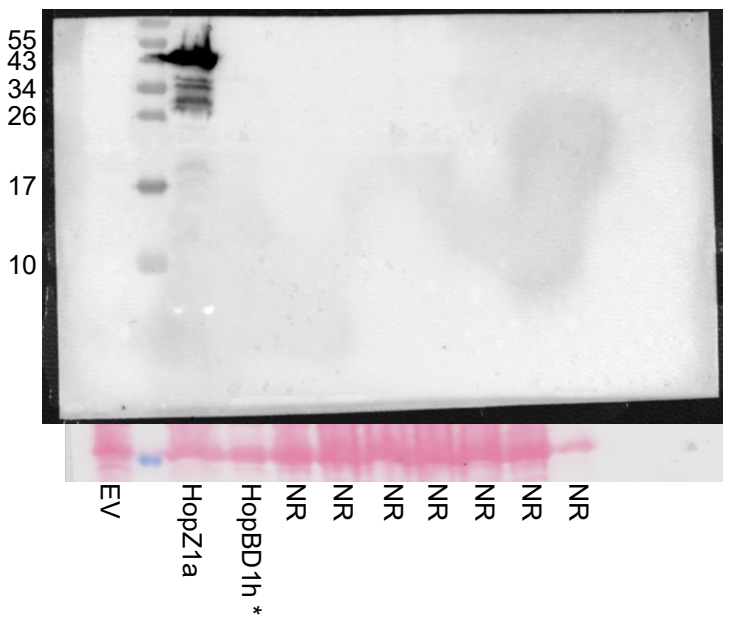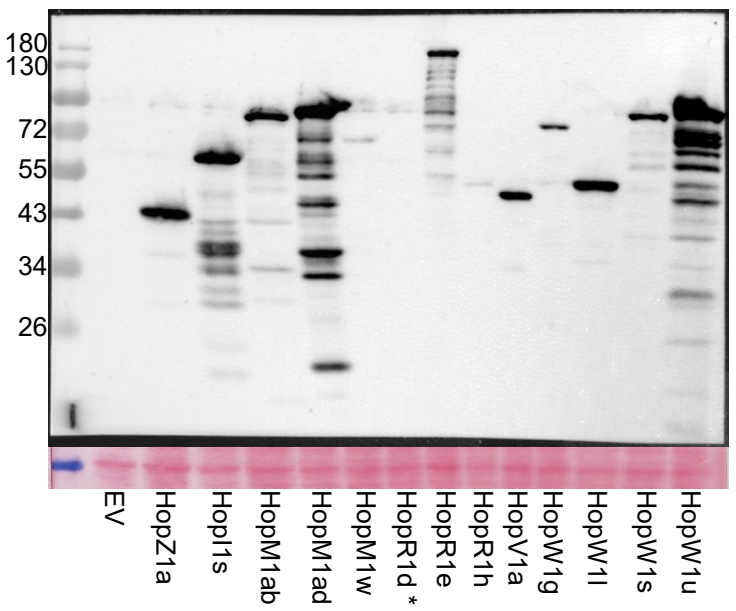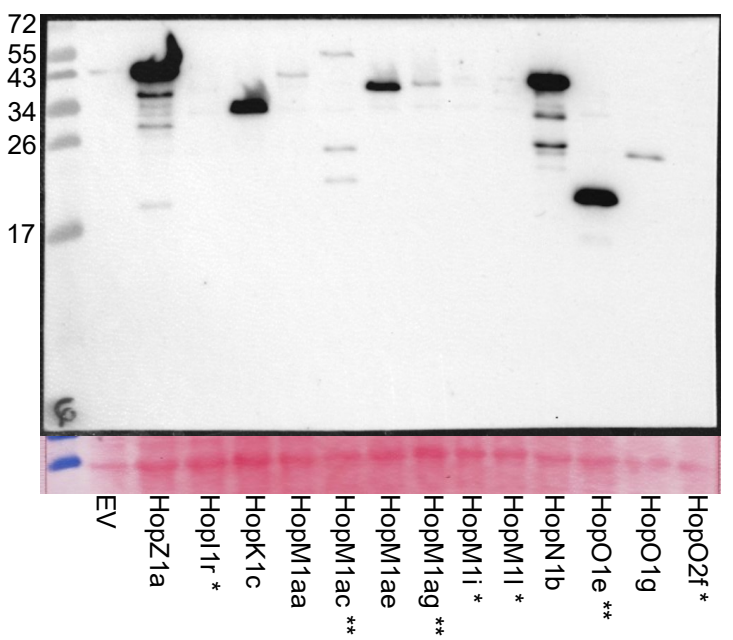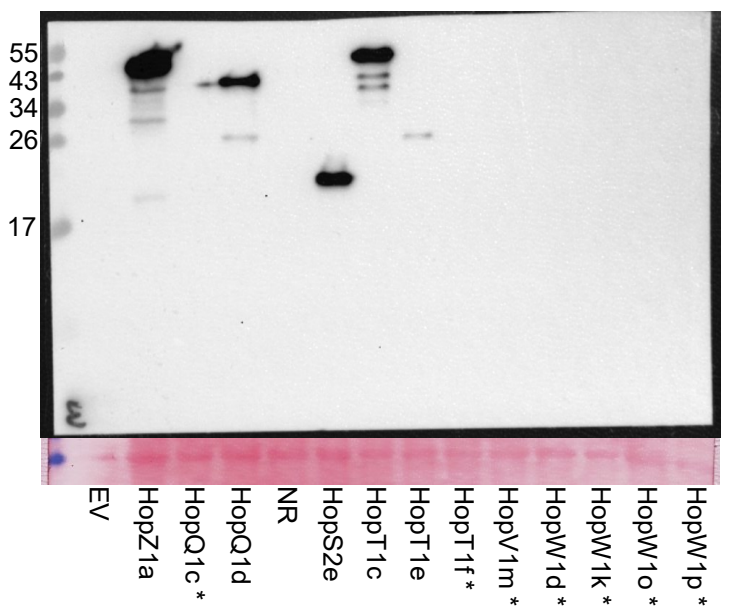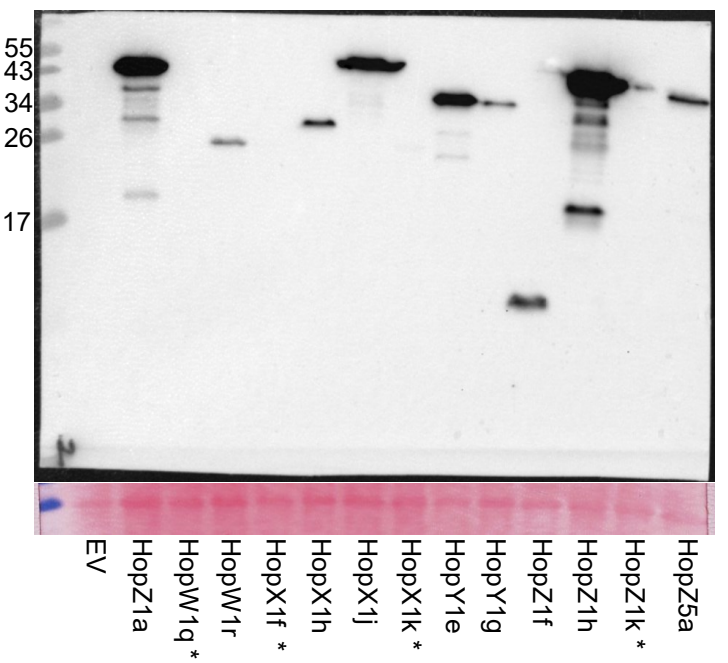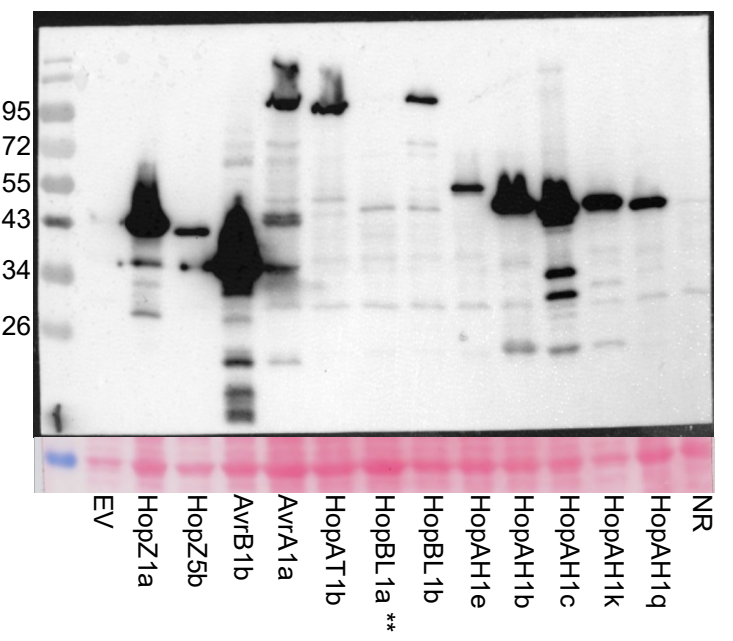

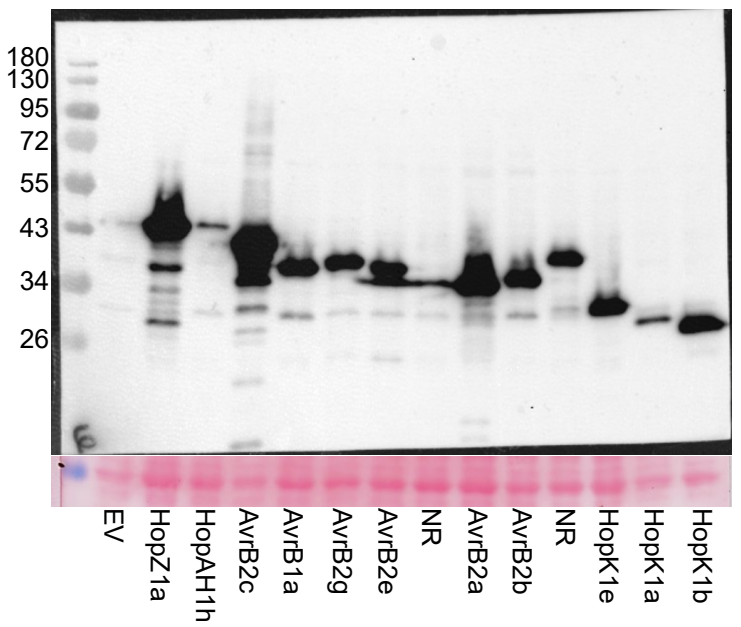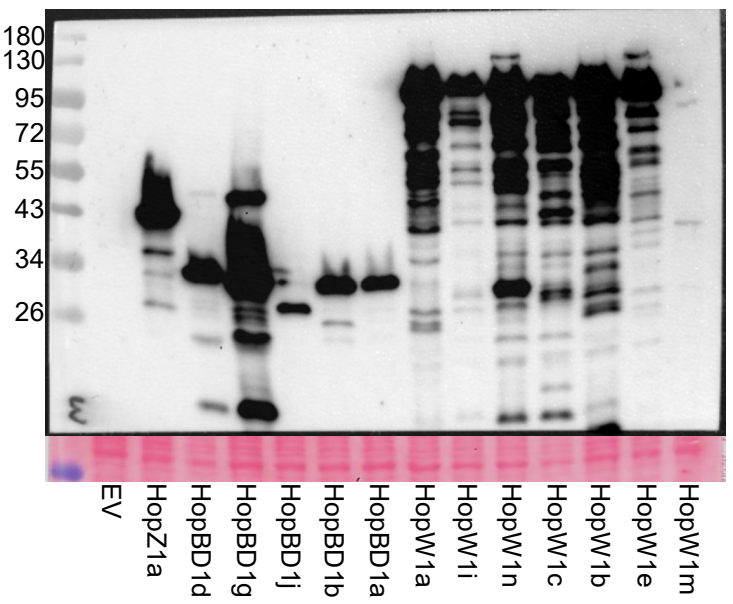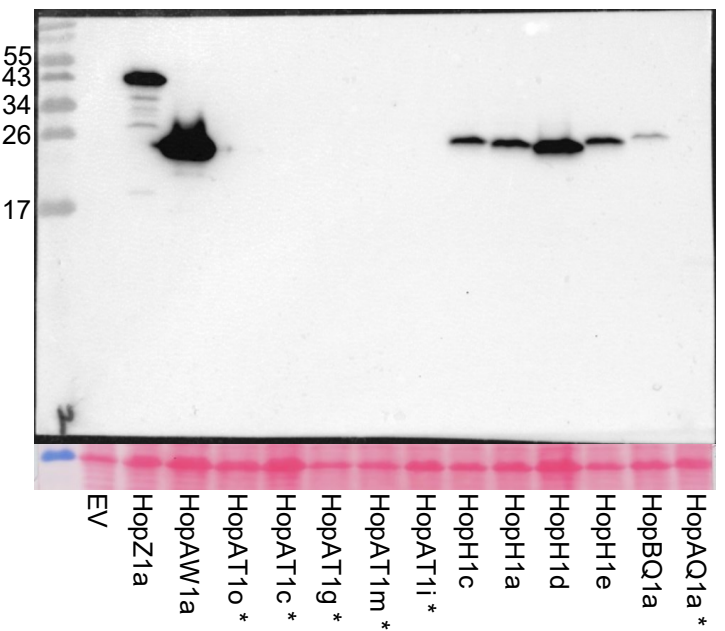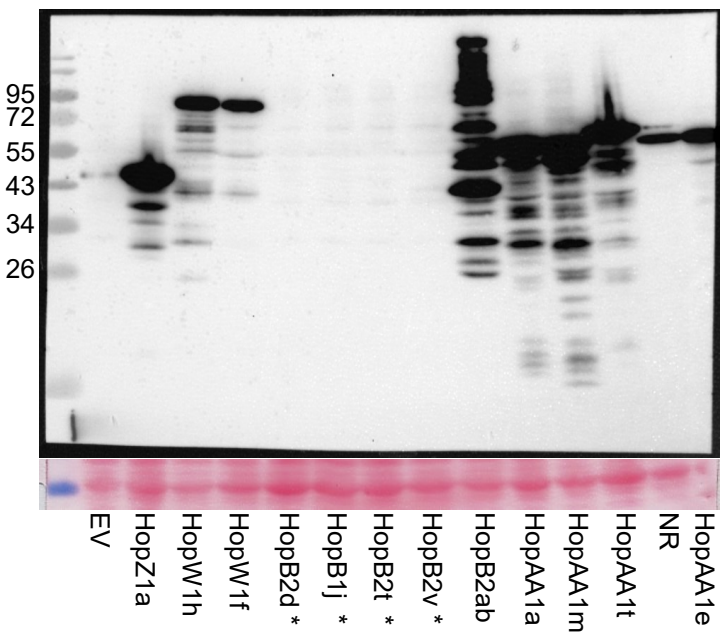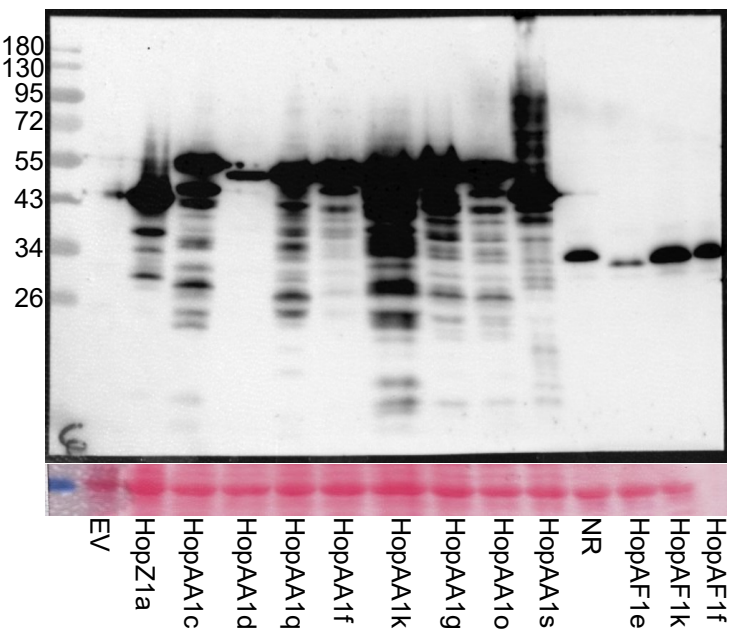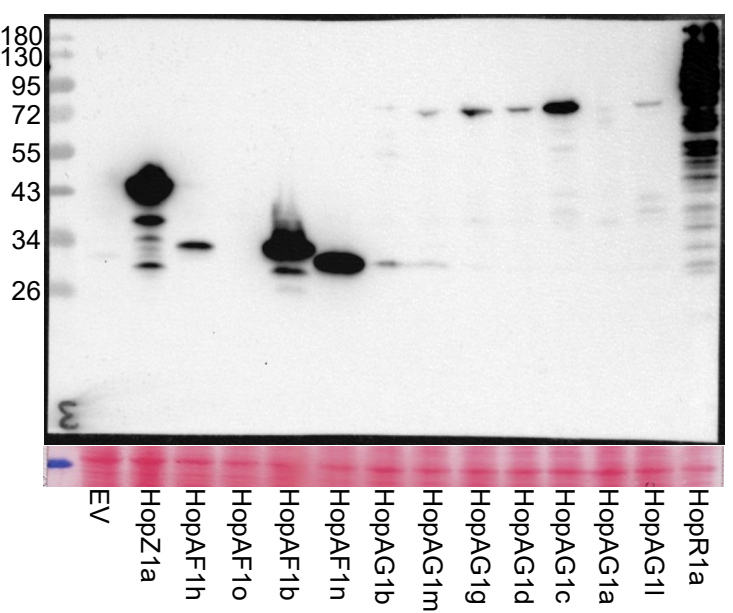



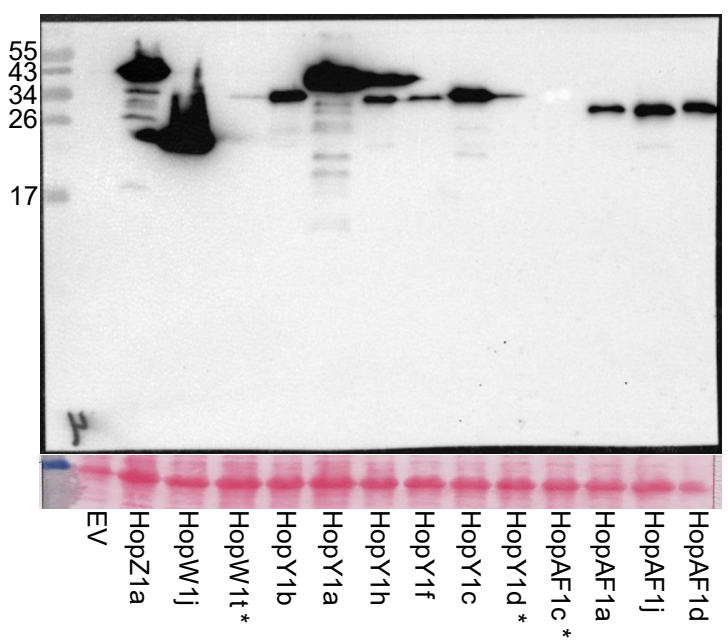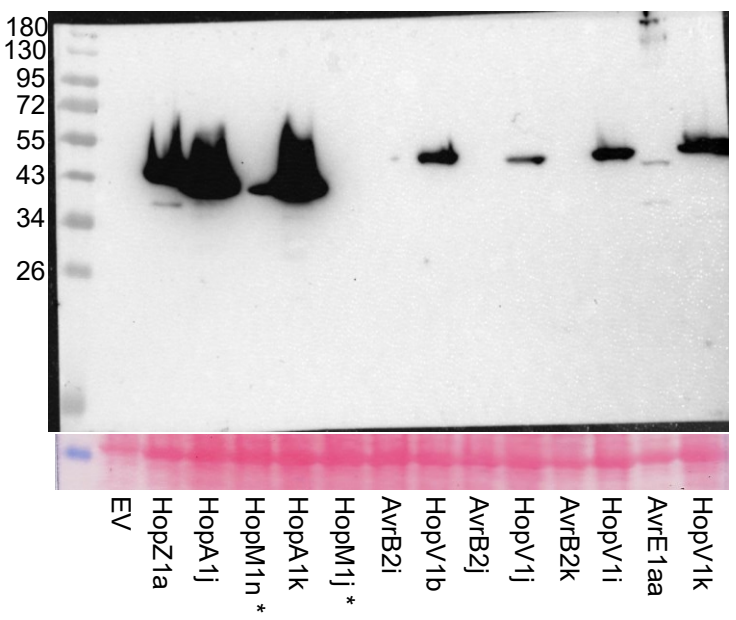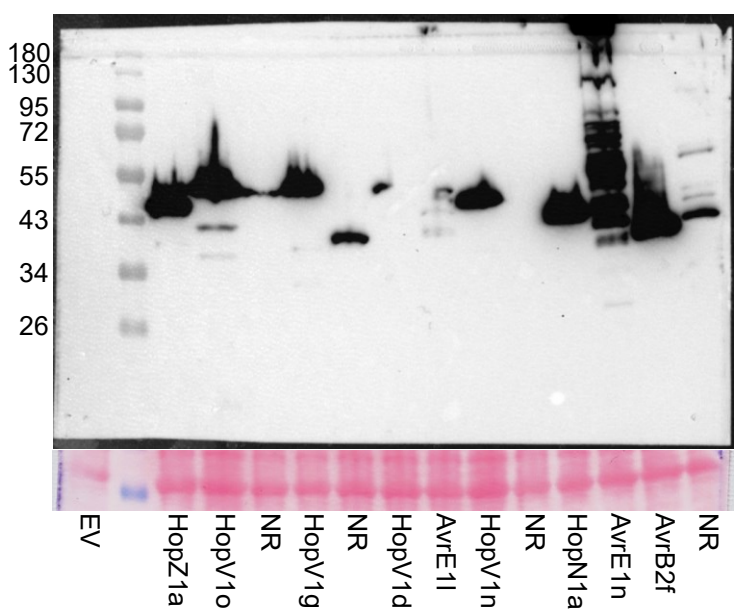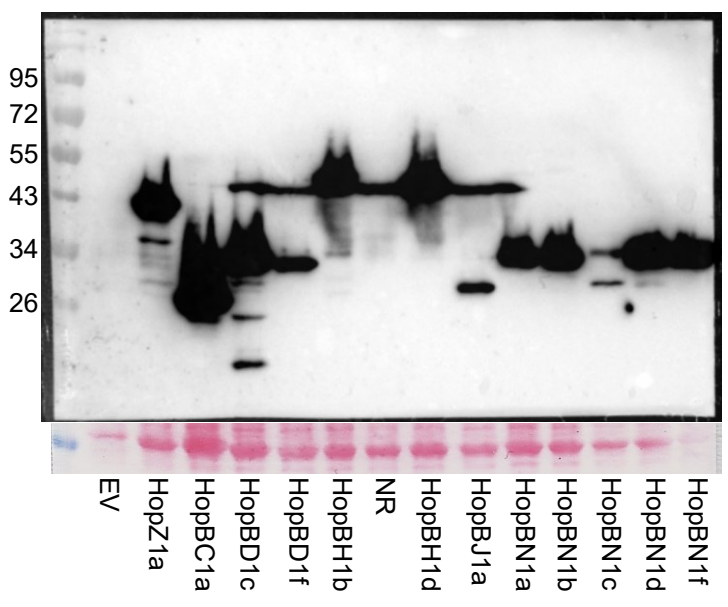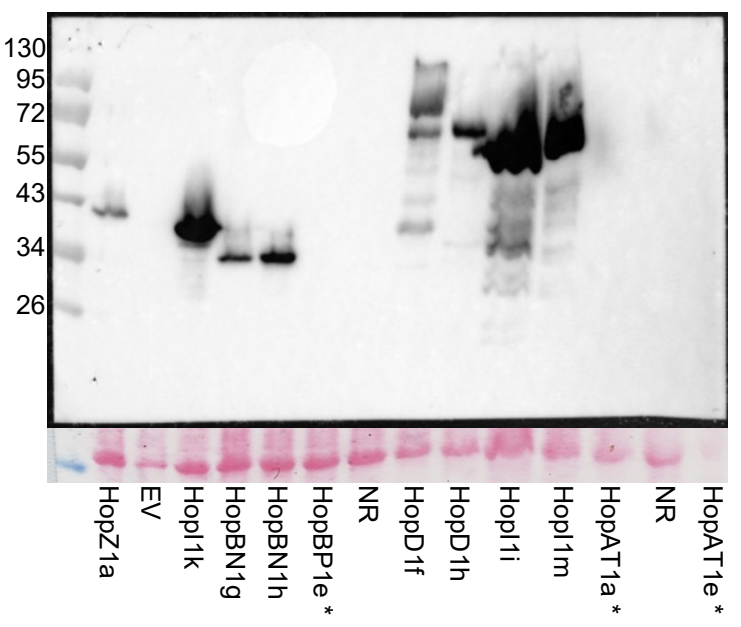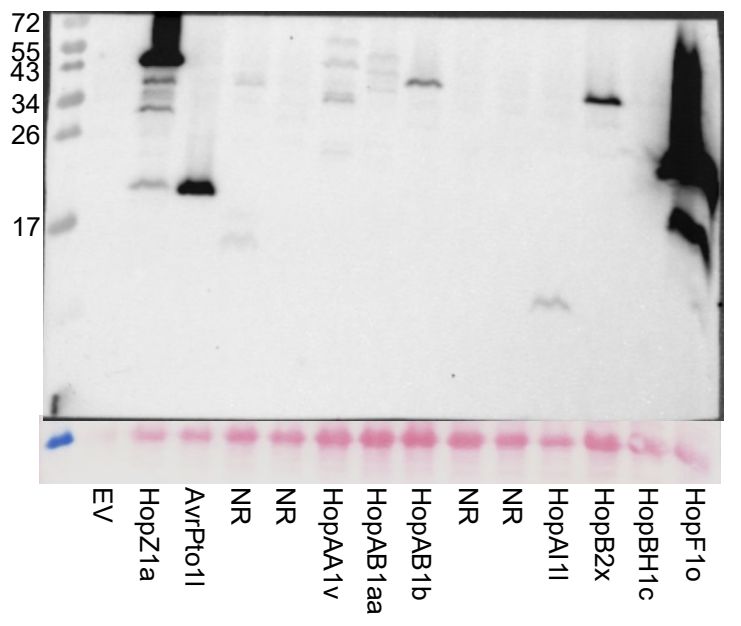

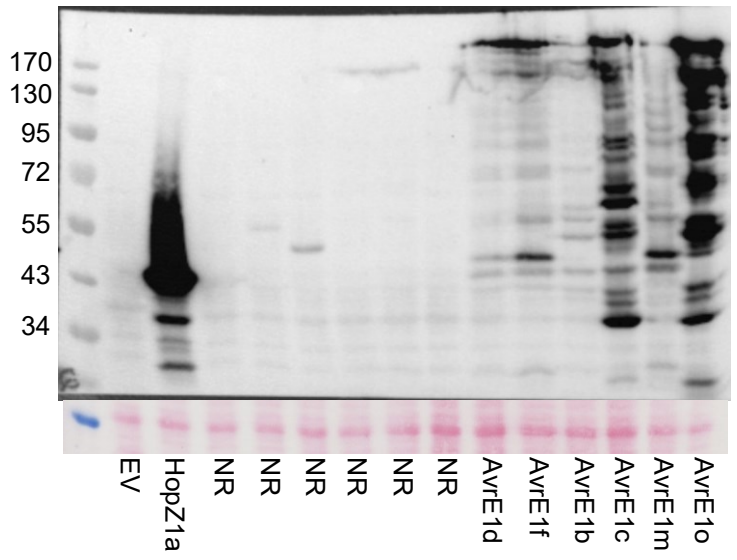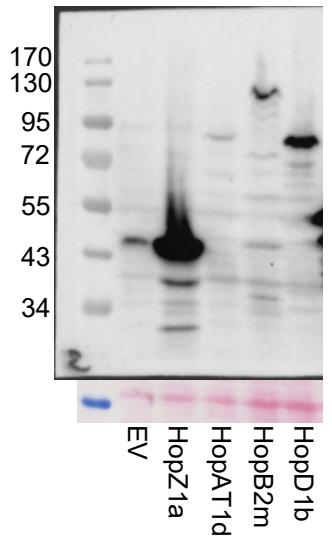

Supplement: ppat.1010541.s005.pdf [file ppat.1010541.s005.pdf]
