# Supplementary material for: Metaeffector interactions modulate the type III effector-triggered immunity load of Pseudomonas syringae
Source: PubMed Central journal article supplement (PMC9135338; doi:10.1371/journal.ppat.1010541), 2022-05-16

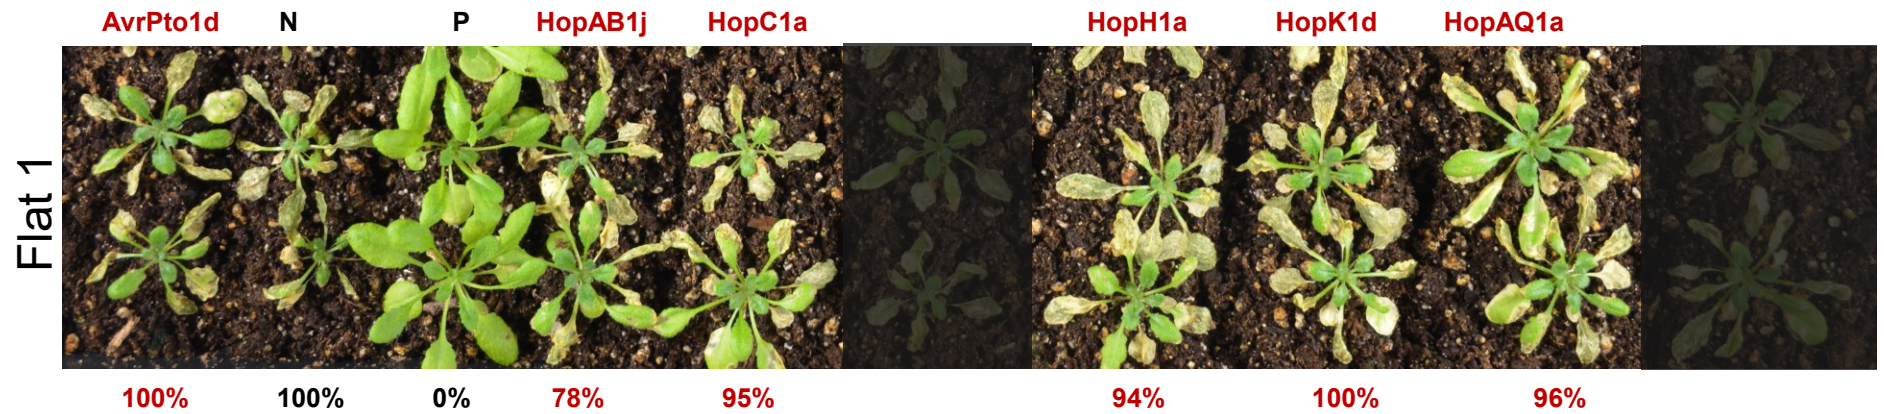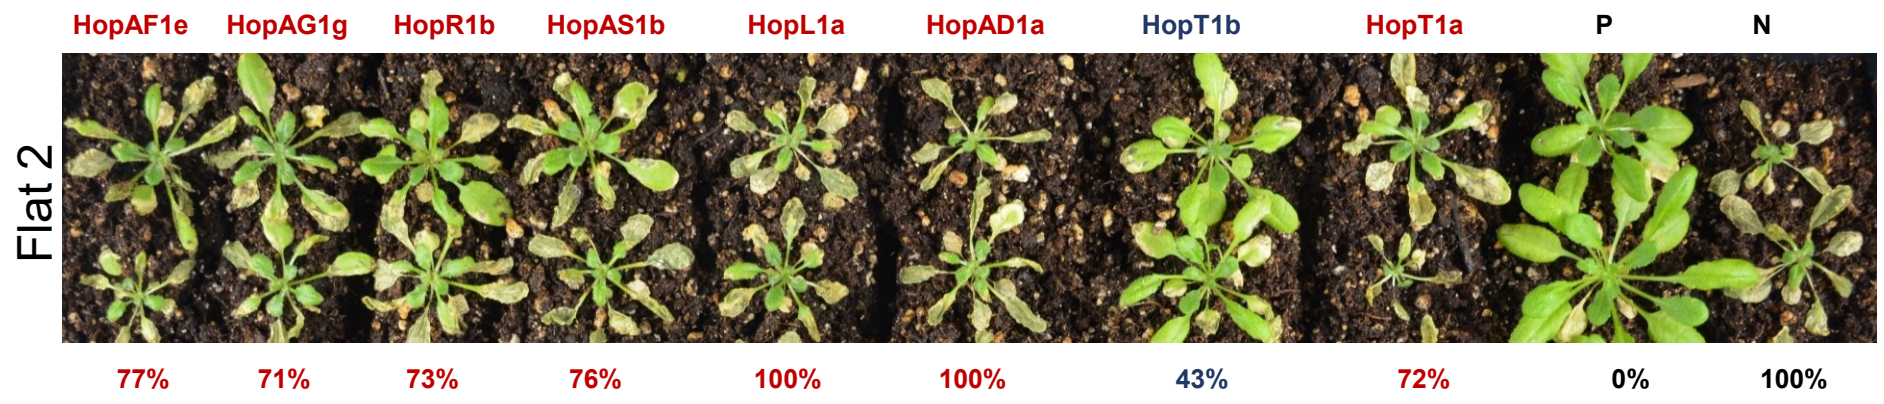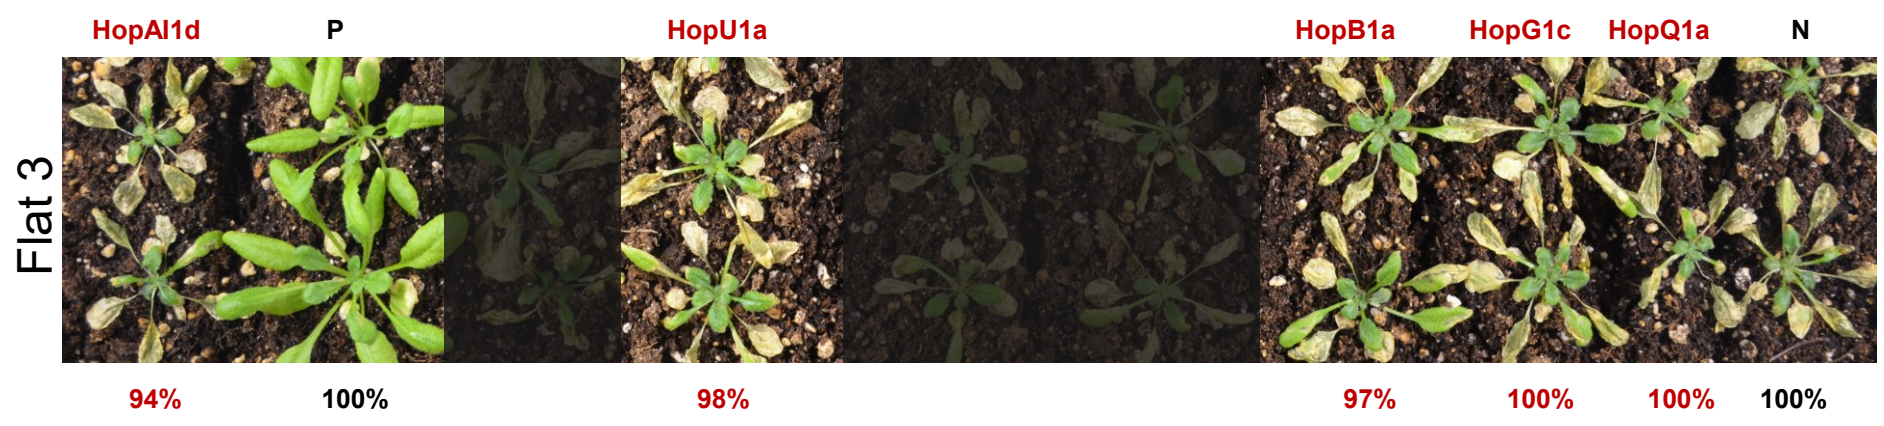

Flat 4

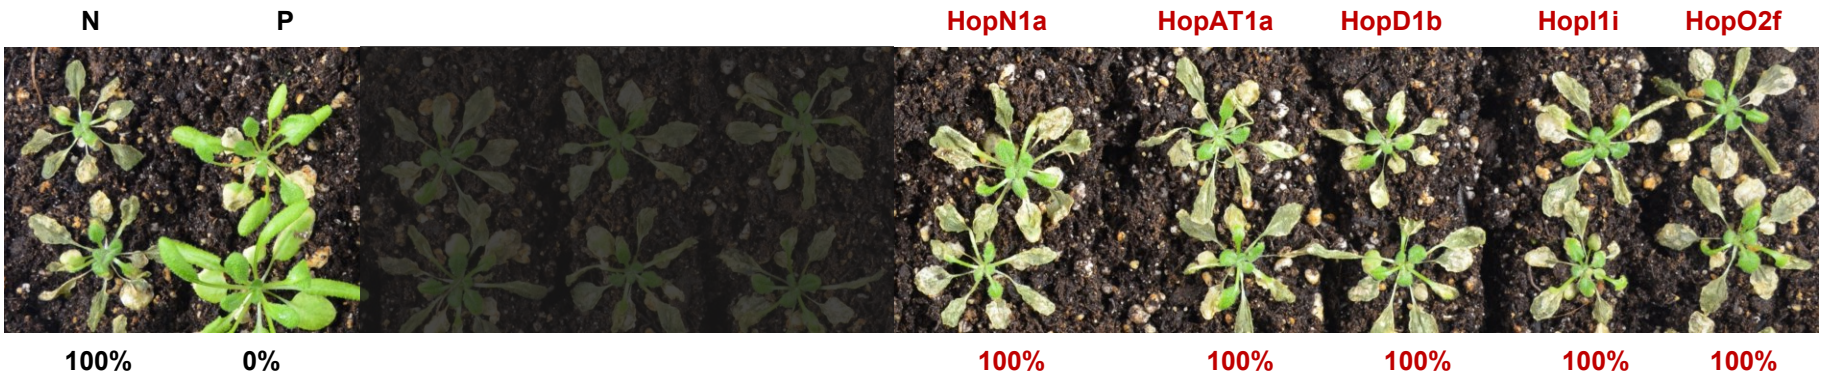

Flat 5

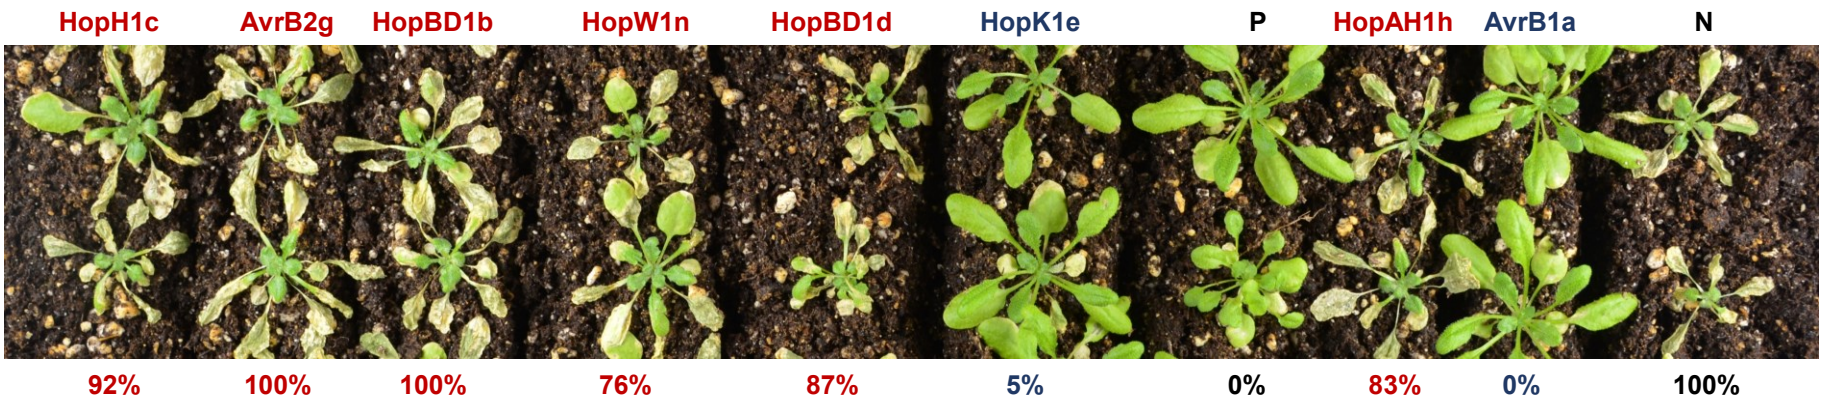

Flat 6

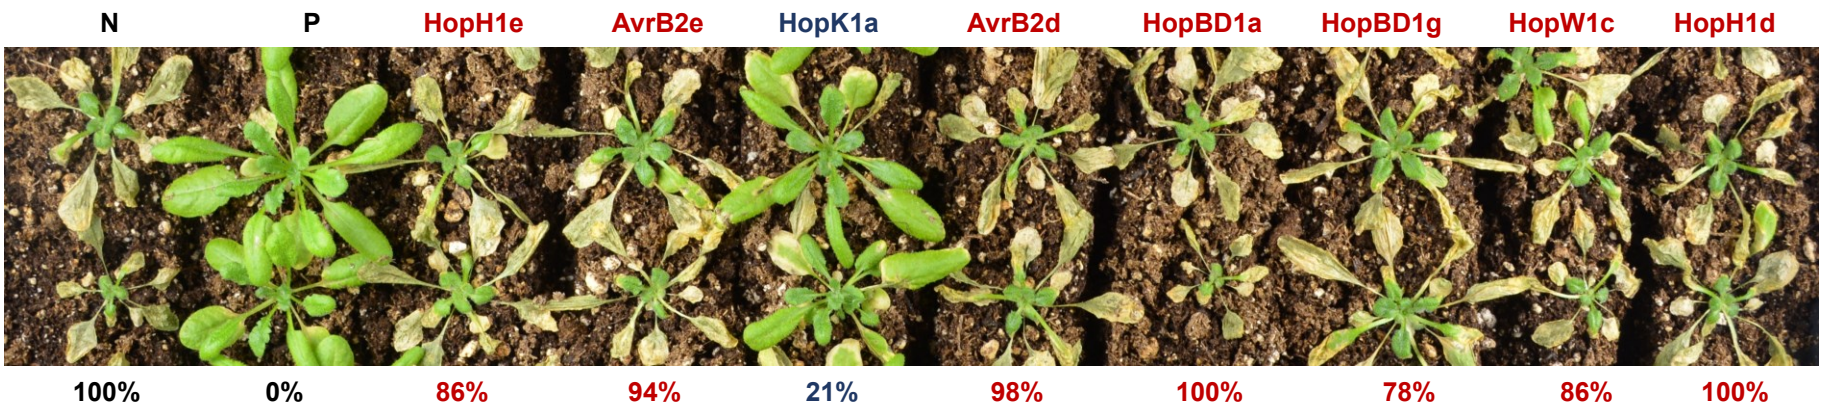

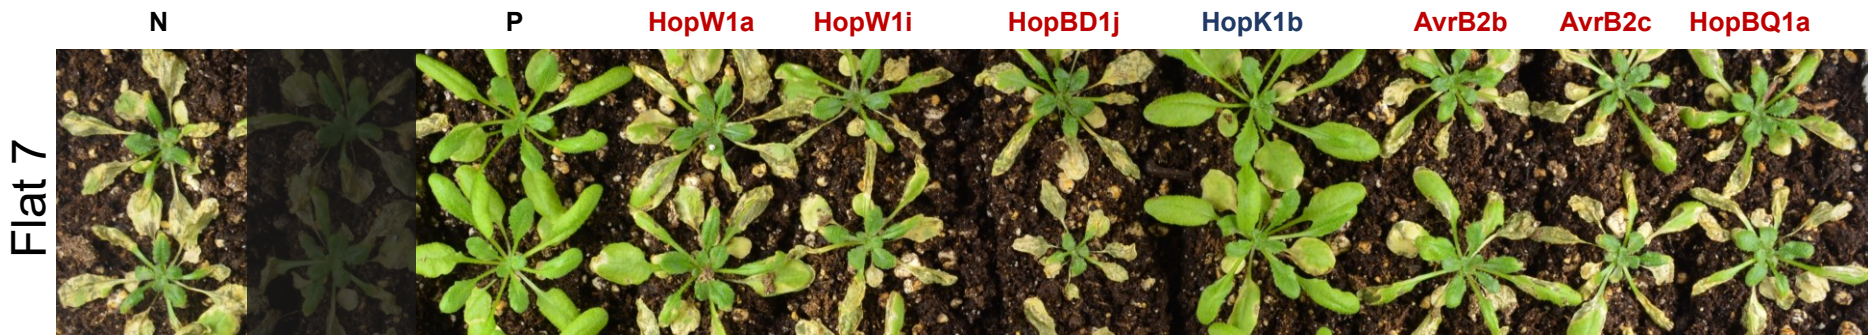

N P HopW1a HopW1i HopBD1j HopK1b AvrB2b AvrB2c HopBQ1a

100% 0% 74% 83% 96% 10% 62% 74% 85%

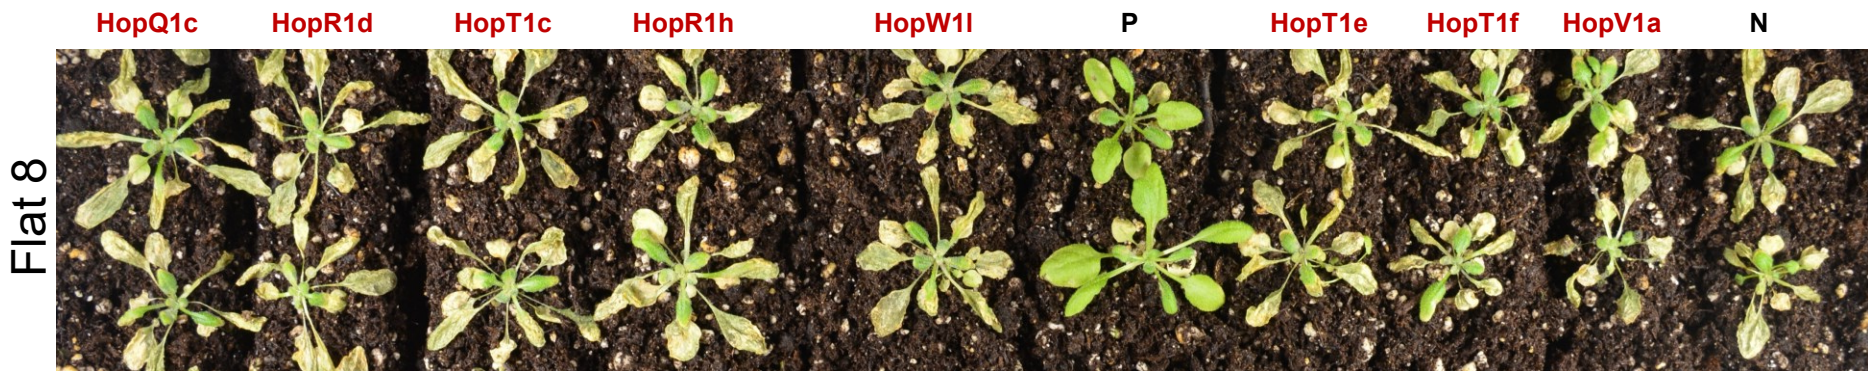

HopQ1c HopR1d HopT1c HopR1h HopW1l P HopT1e HopT1f HopV1a N

89% 100% 95% 94% 100% 0% 97% 83% 80% 100%

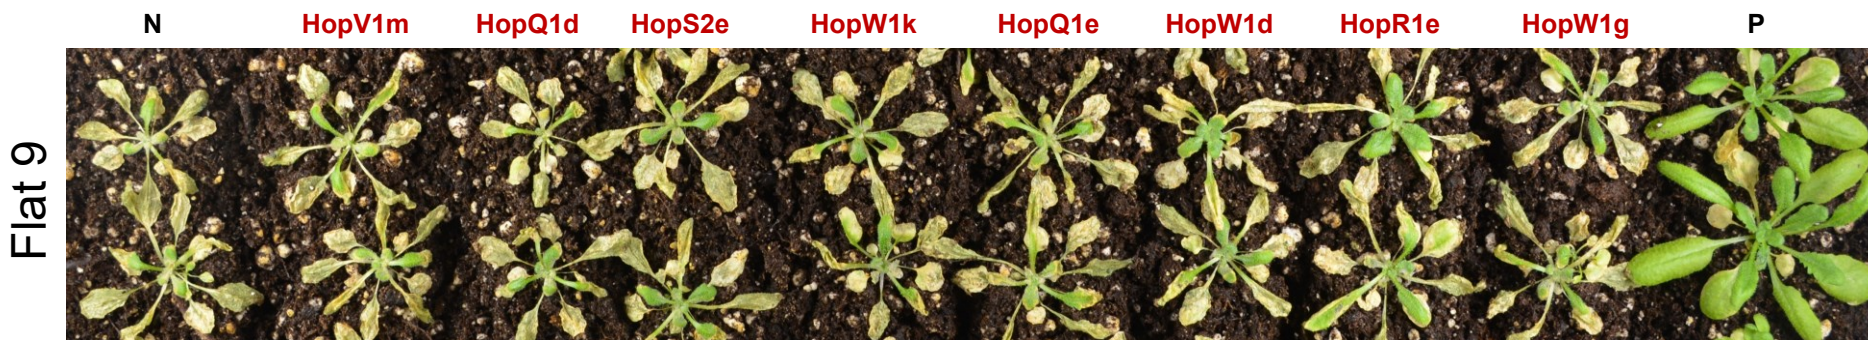

N HopV1m HopQ1d HopS2e HopW1k HopQ1e HopW1d HopR1e HopW1g P

100% 84% 93% 84% 83% 92% 81% 66% 84% 0%

Flat 10

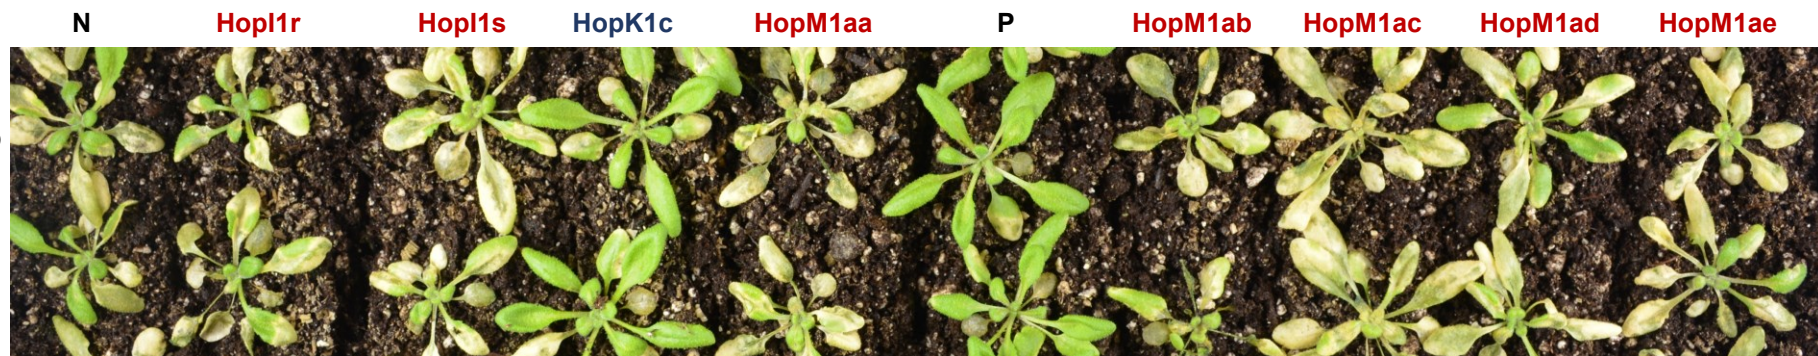

100% 95% 100% 21% 100% 0% 100% 100% 100% 100%

Flat 11

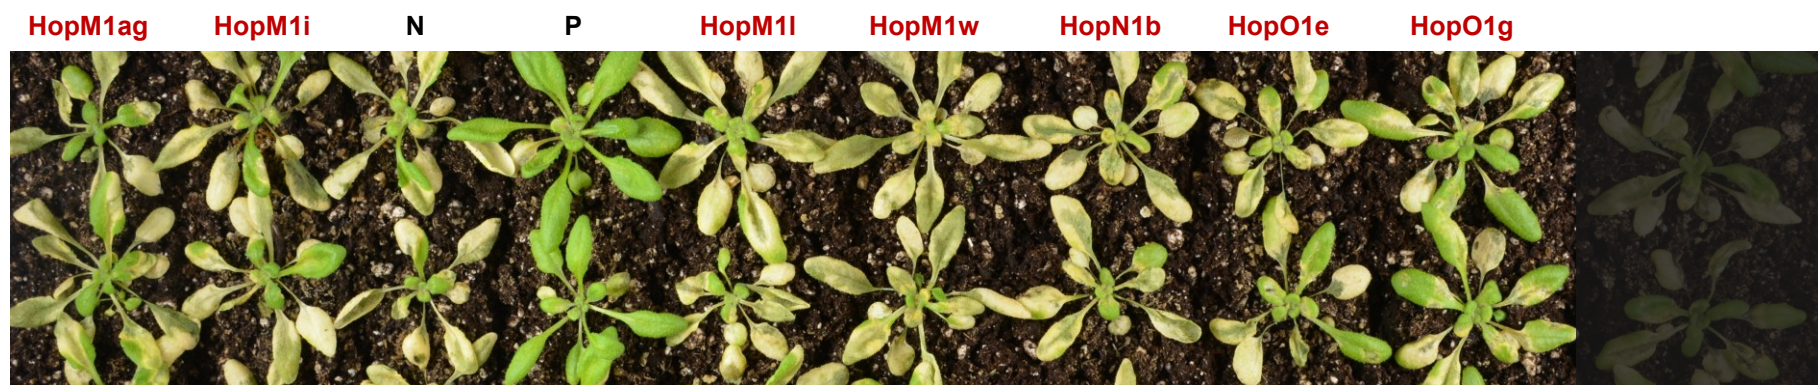

80% 92% 100% 0% 100% 100% 100% 84% 66%

Flat 12

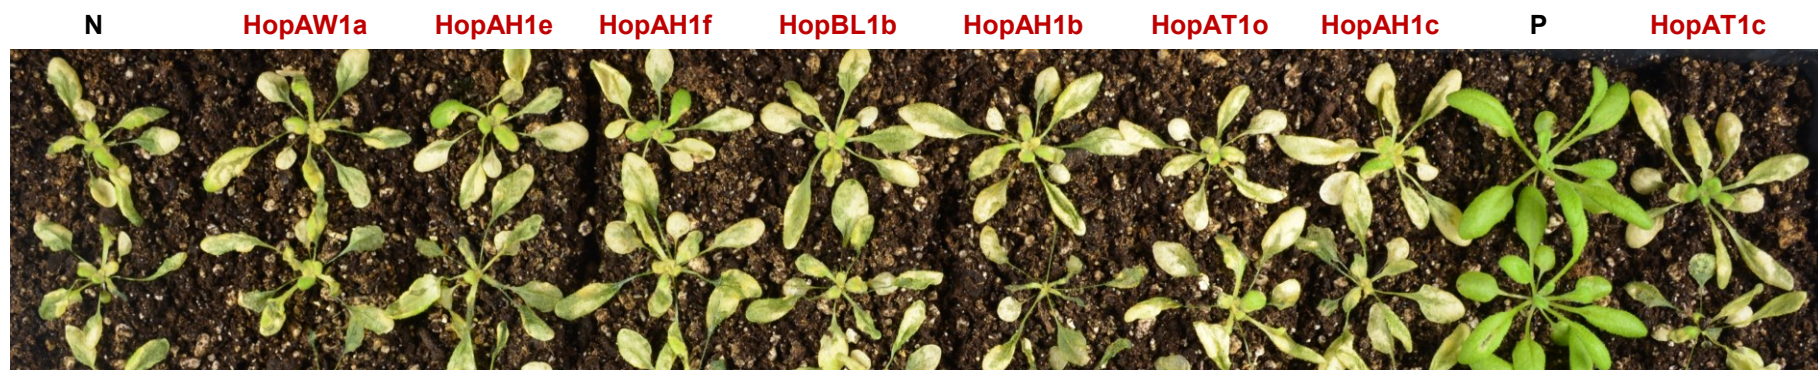

100% 100% 100% 100% 100% 100% 100% 100% 0% 100%

Flat 13

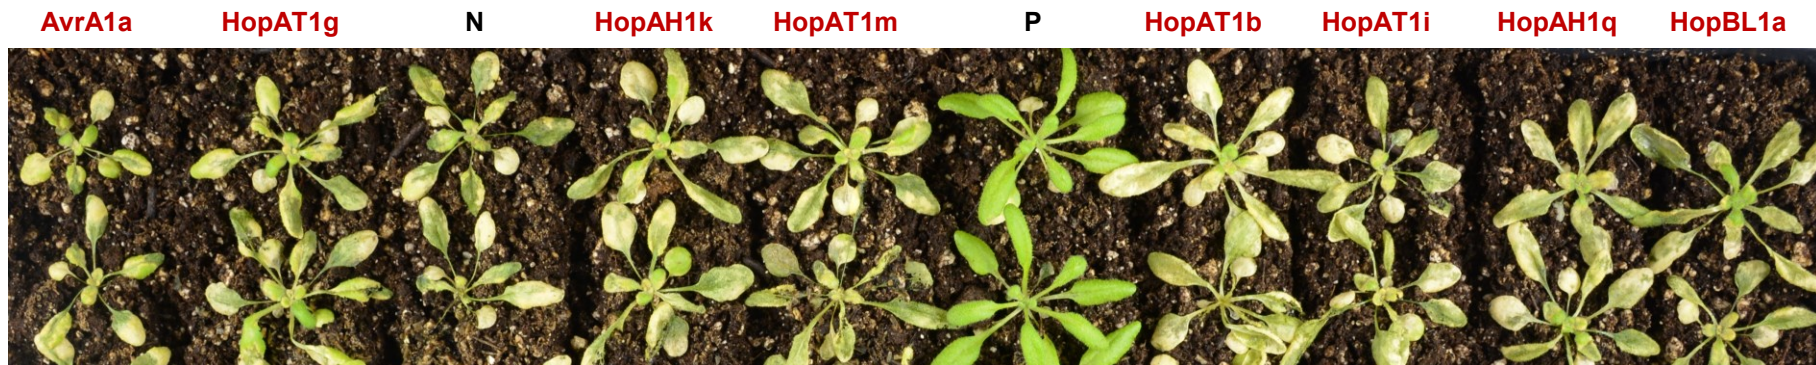

77% 91% 100% 100% 98% 0% 100% 100% 100% 100%

Flat 14

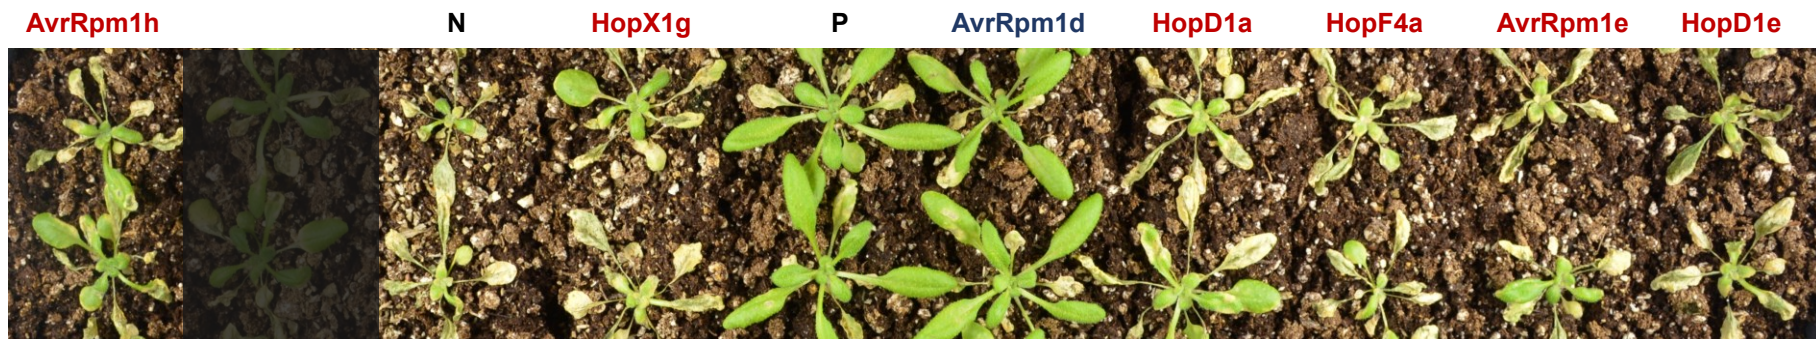

67% 100% 100% 0% 0% 83% 100% 96% 94%

Flat 15

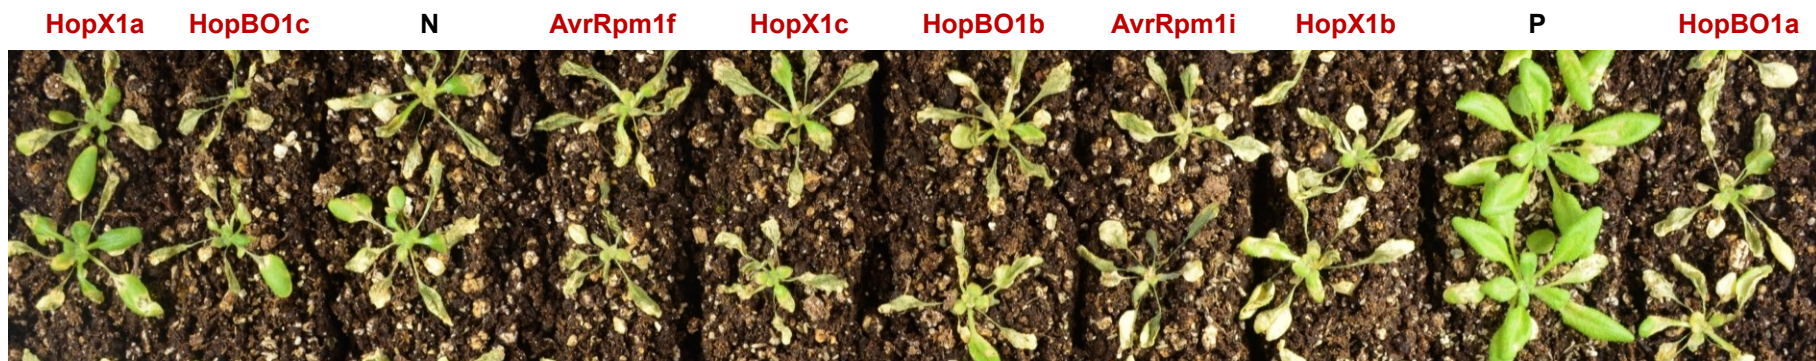

76% 90% 100% 100% 100% 100% 100% 100% 0% 100%

Flat 16

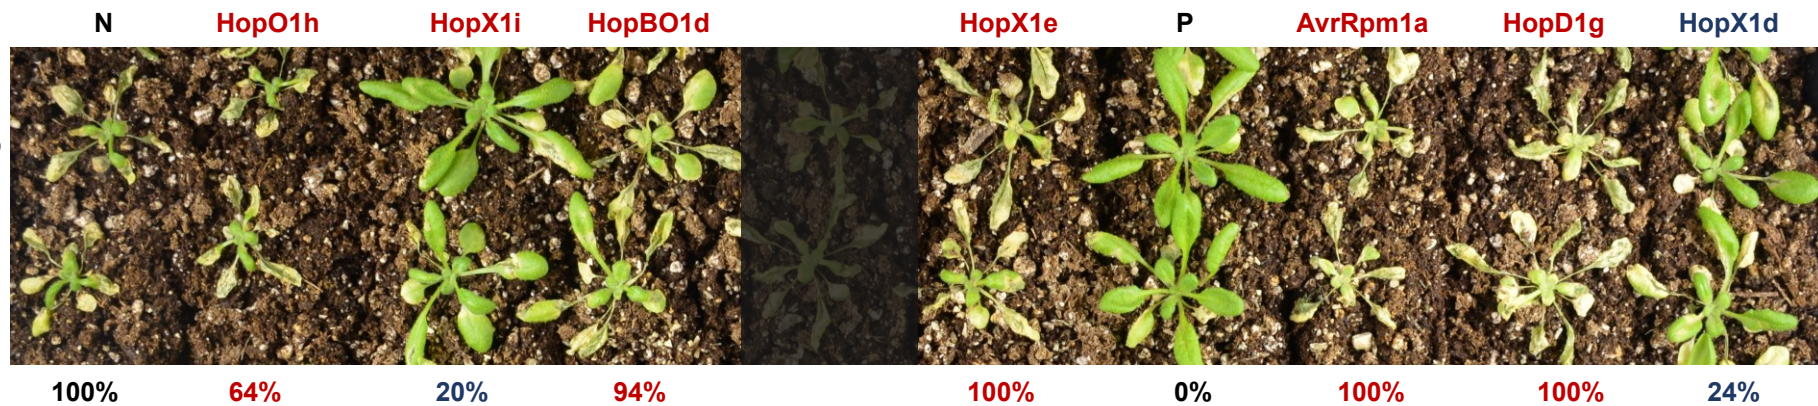

Flat 17

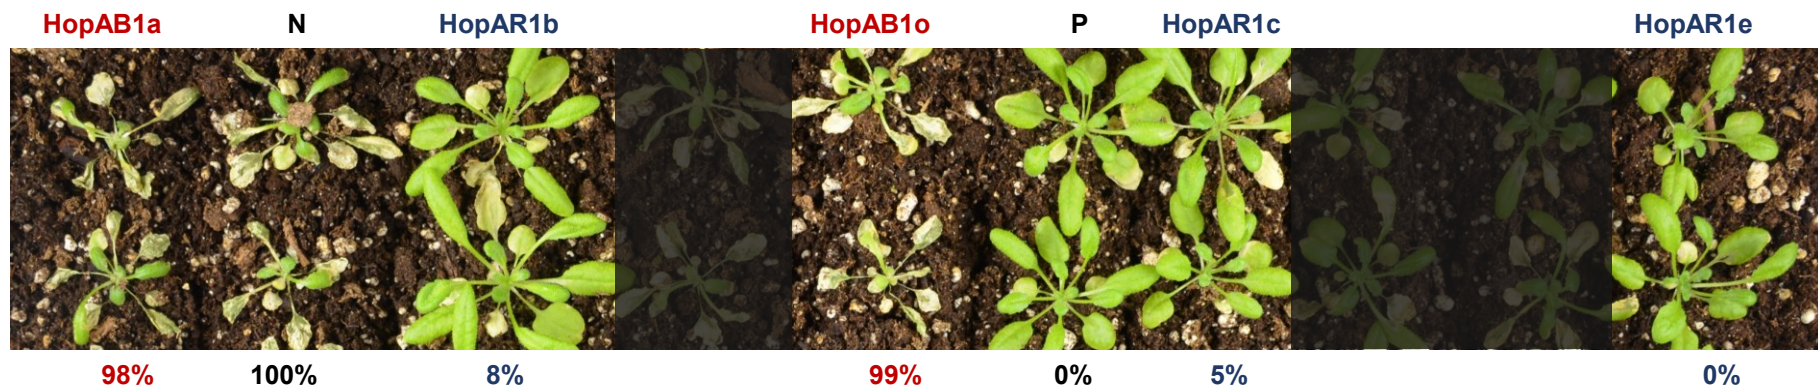

Flat 18

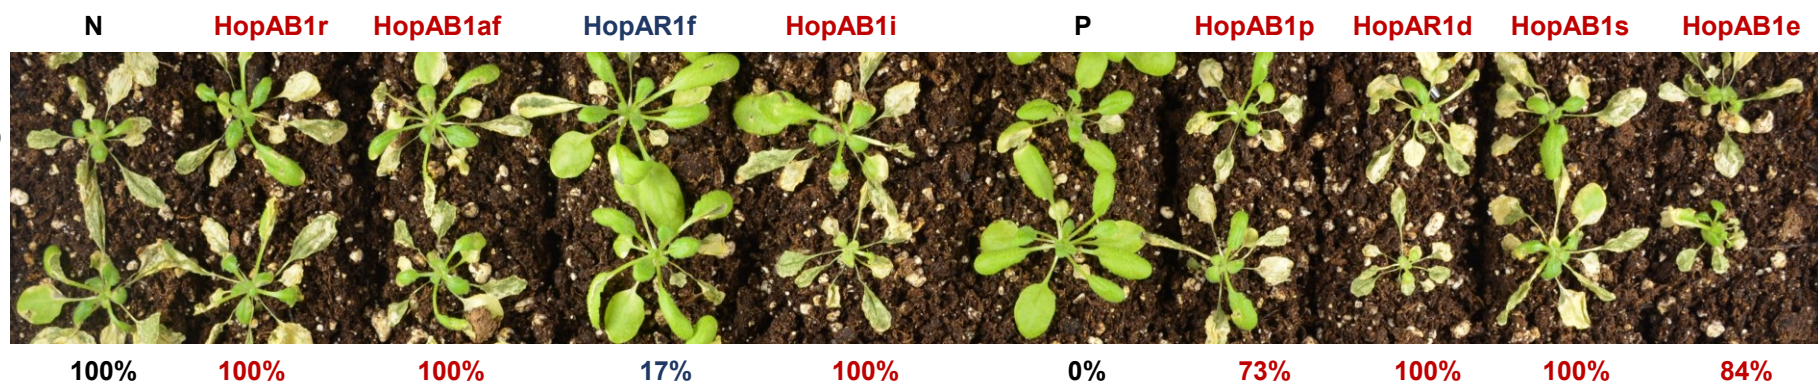

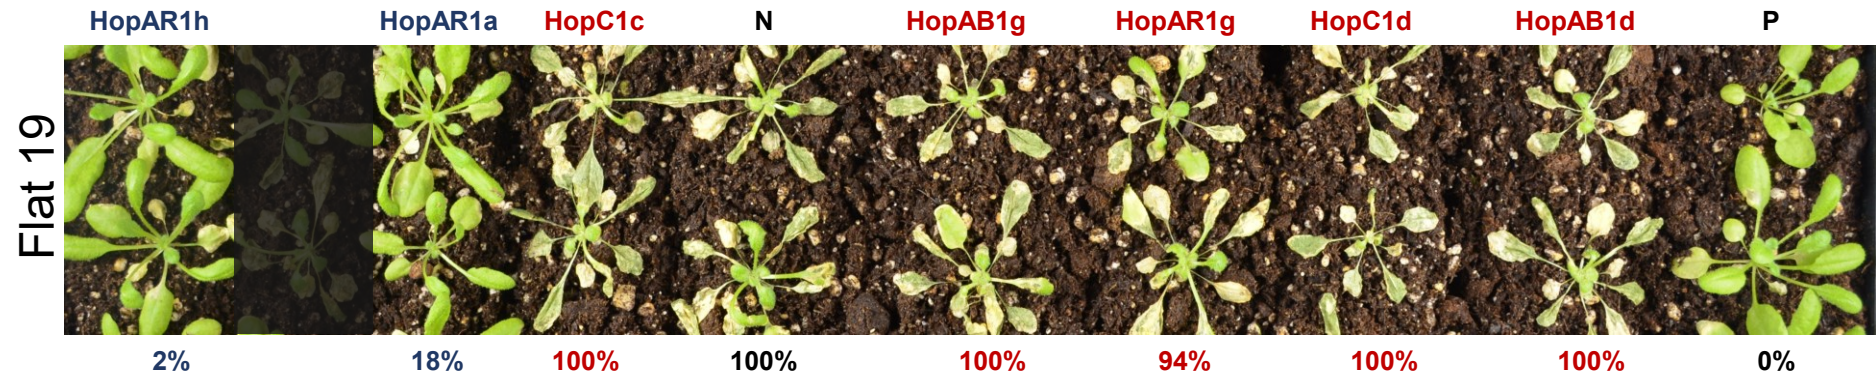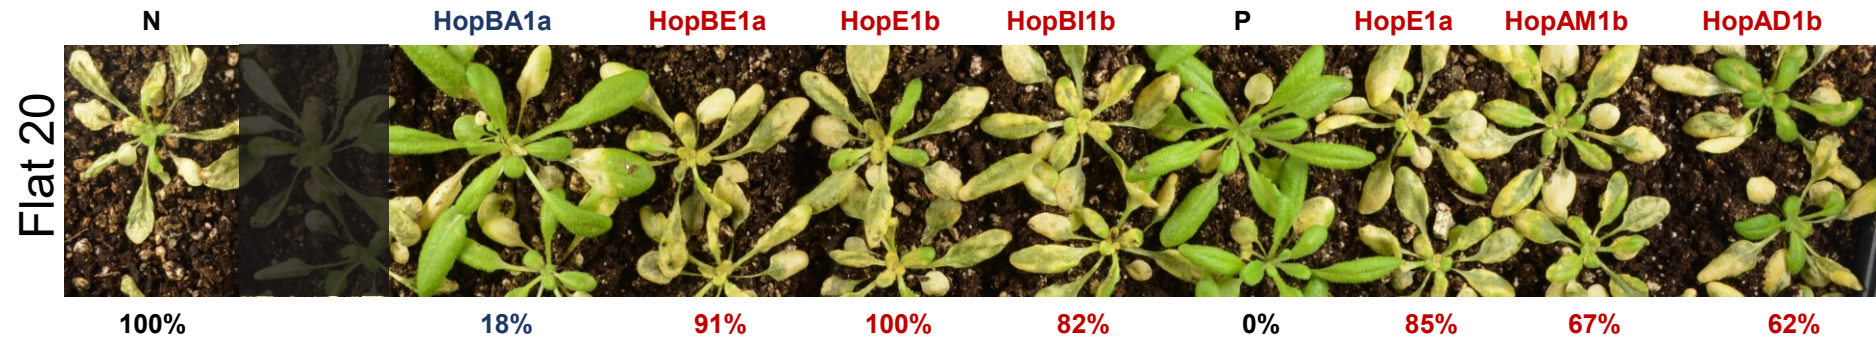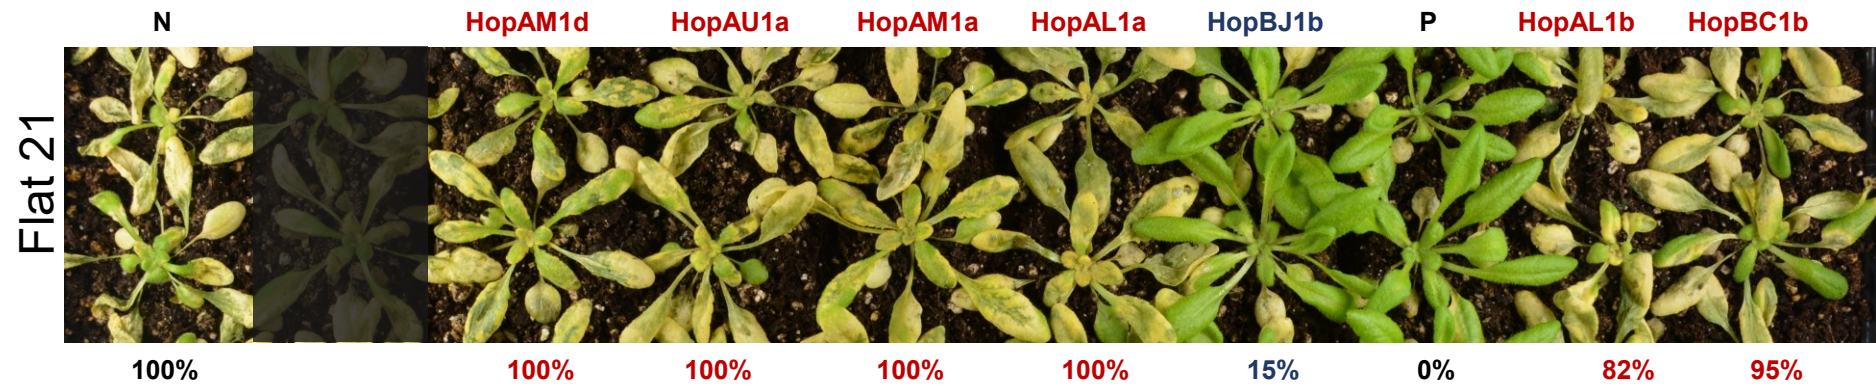

Flat 22

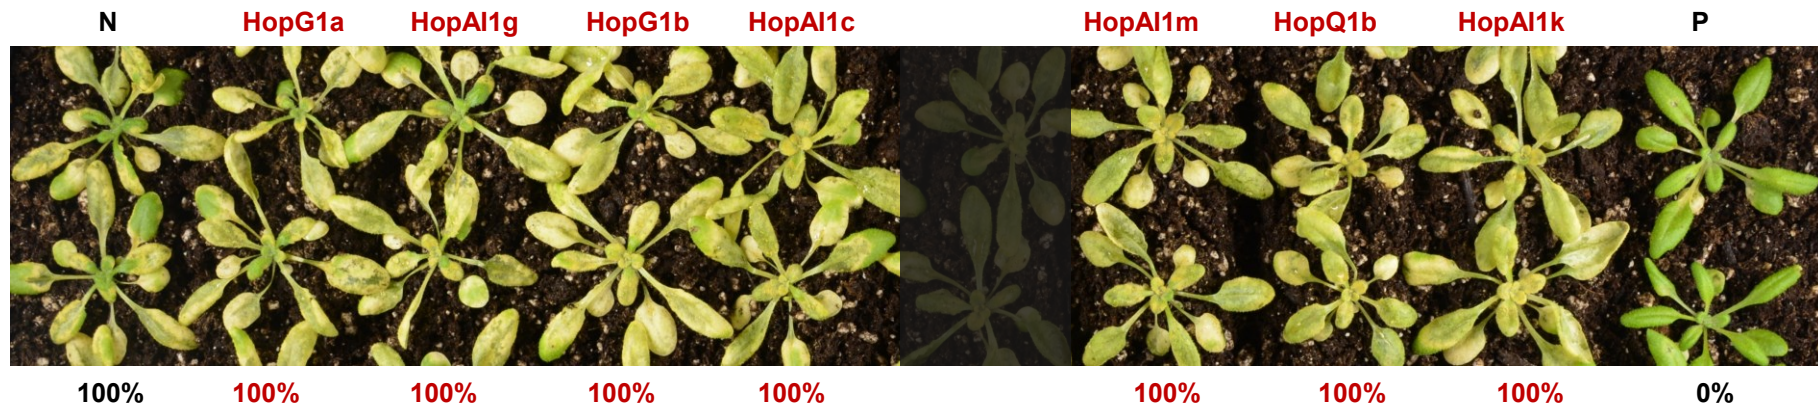

Flat 23

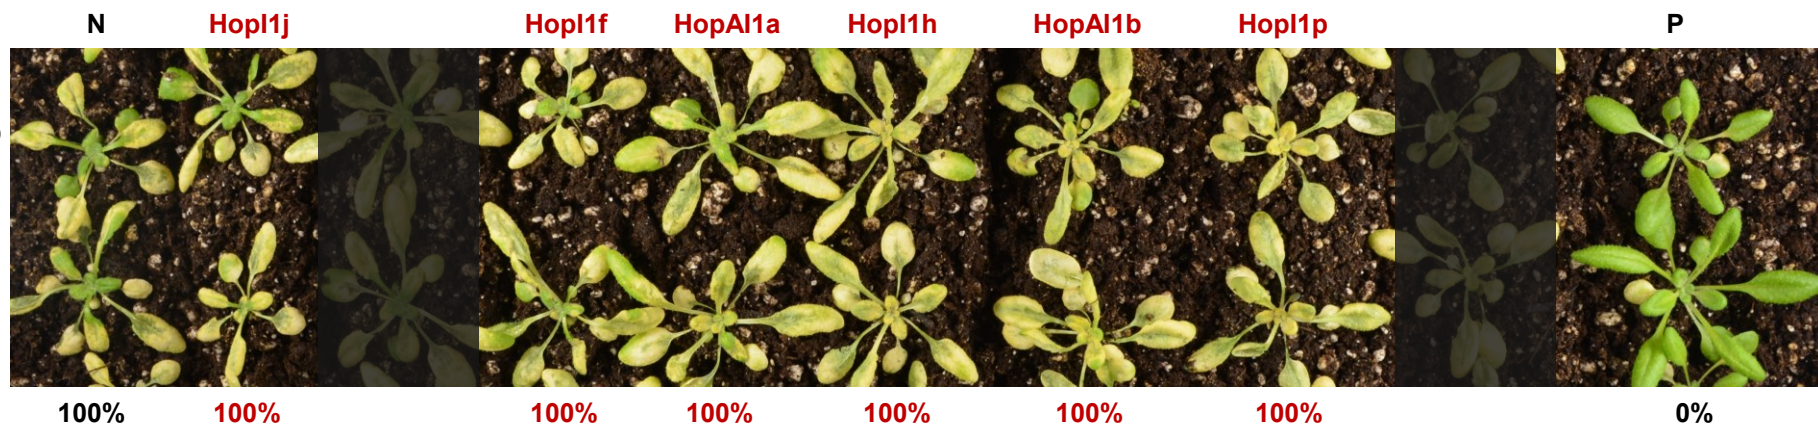

Flat 24

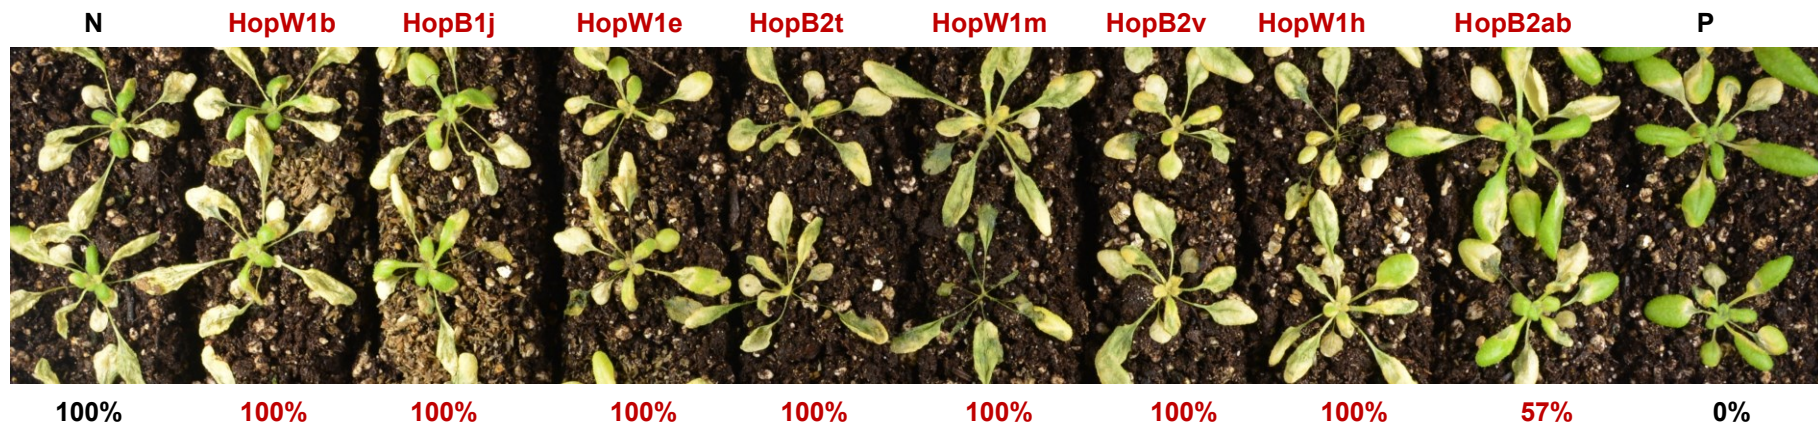



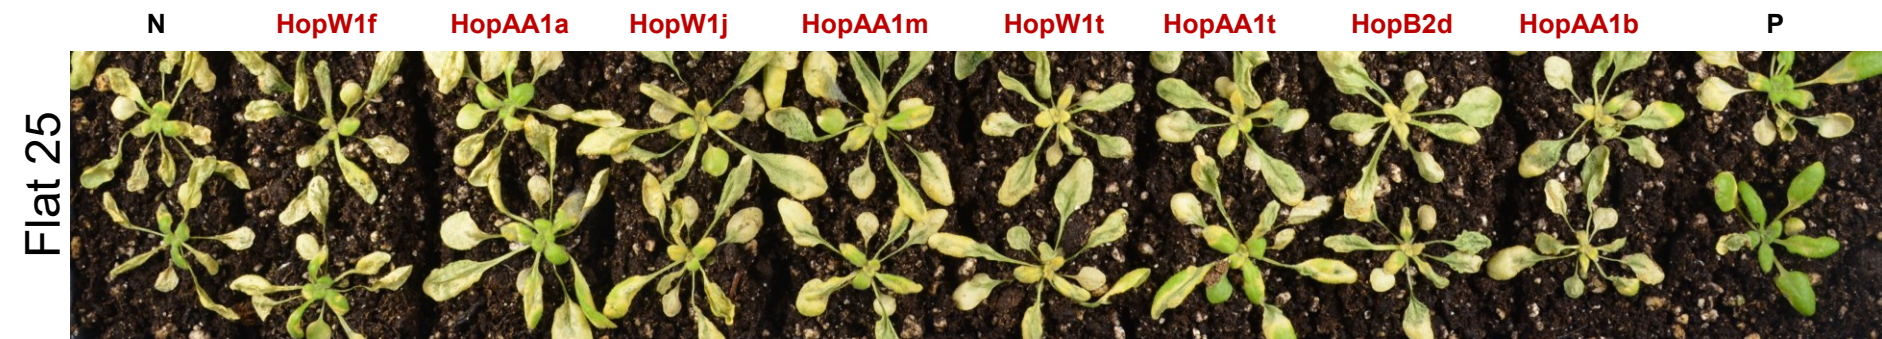

N HopW1f HopAA1a HopW1j HopAA1m HopW1t HopAA1t HopB2d HopAA1b P

100% 97% 84% 100% 98% 100% 91% 100% 97% 0%

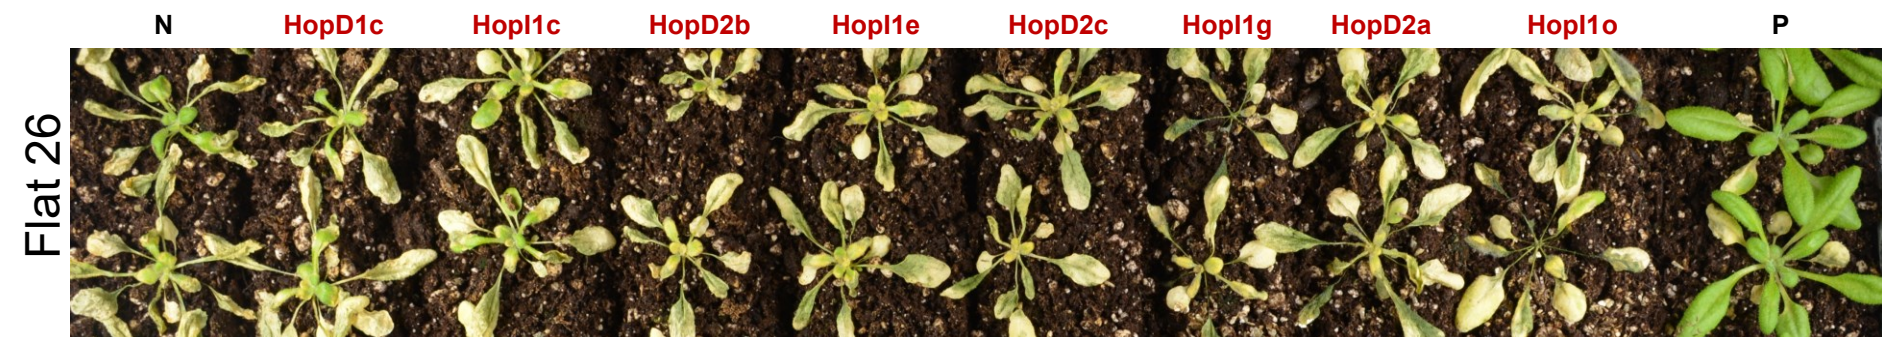

N HopD1c HopI1c HopD2b HopI1e HopD2c HopI1g HopD2a HopI1o P

100% 100% 100% 100% 100% 100% 100% 100% 100% 0%

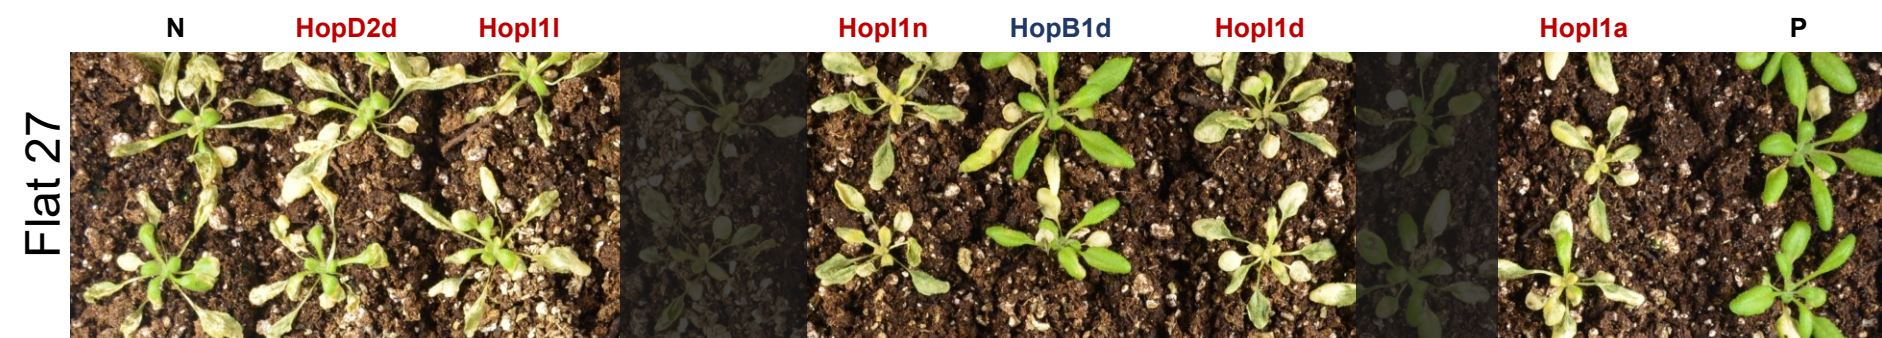

N HopD2d HopI1 HopI1n HopB1d HopI1d HopI1a P

100% 100% 100% 100% 40% 100% 100% 0%

Flat 28

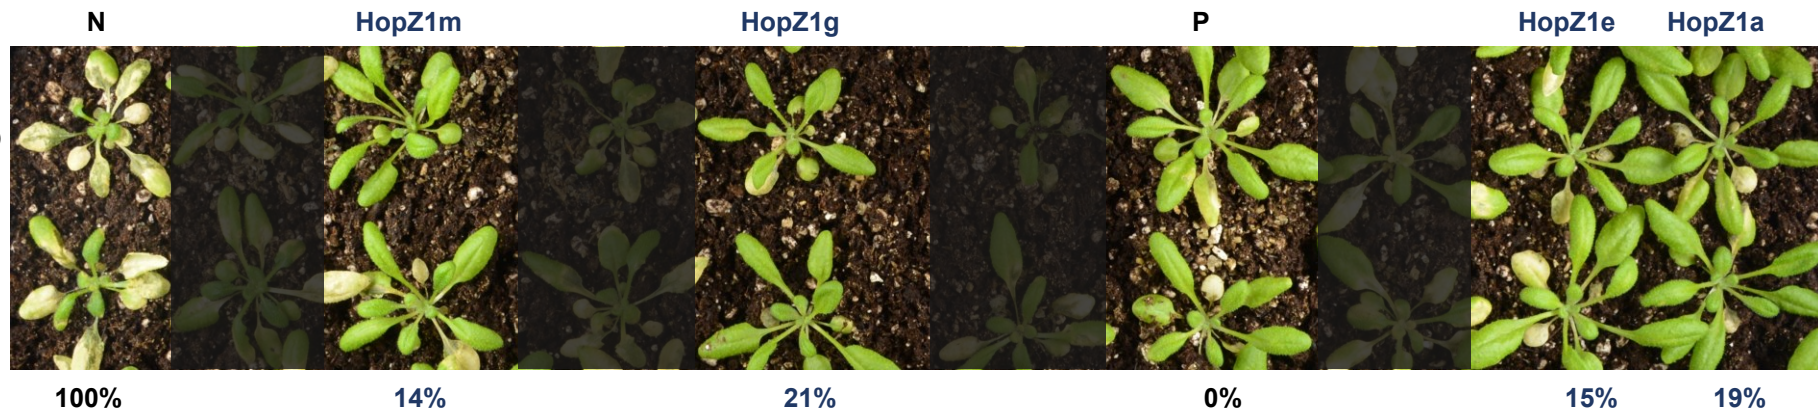

Flat 29

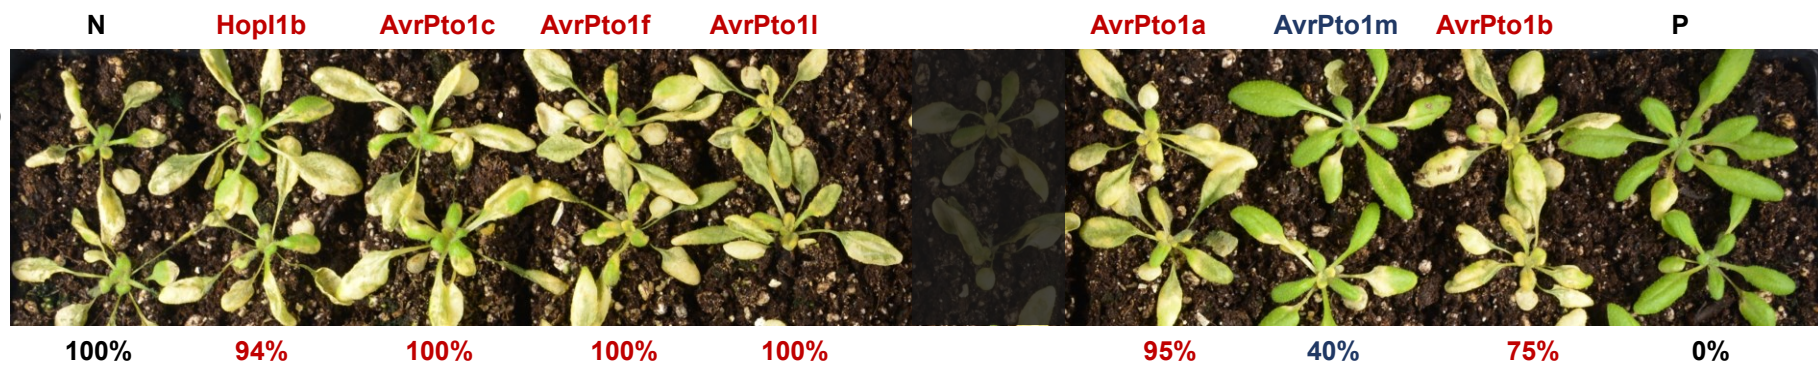

Flat 30

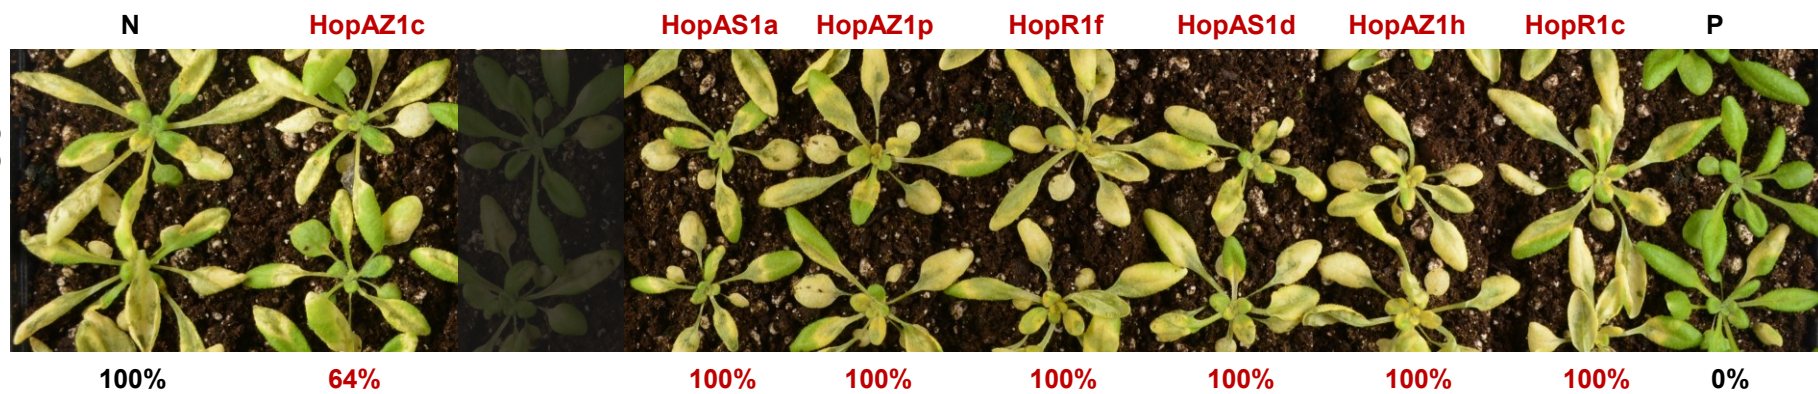

Flat 31

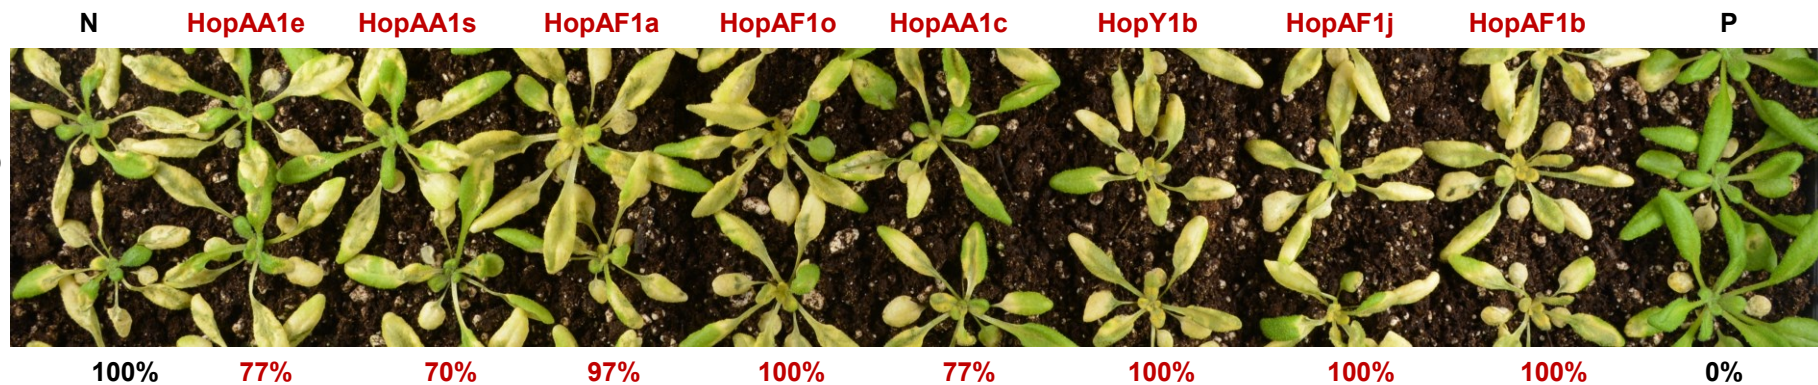

N HopAA1e HopAA1s HopAF1a HopAF1o HopAA1c HopY1b HopAF1j HopAF1b P

100% 77% 70% 97% 100% 77% 100% 100% 100% 0%

Flat 32

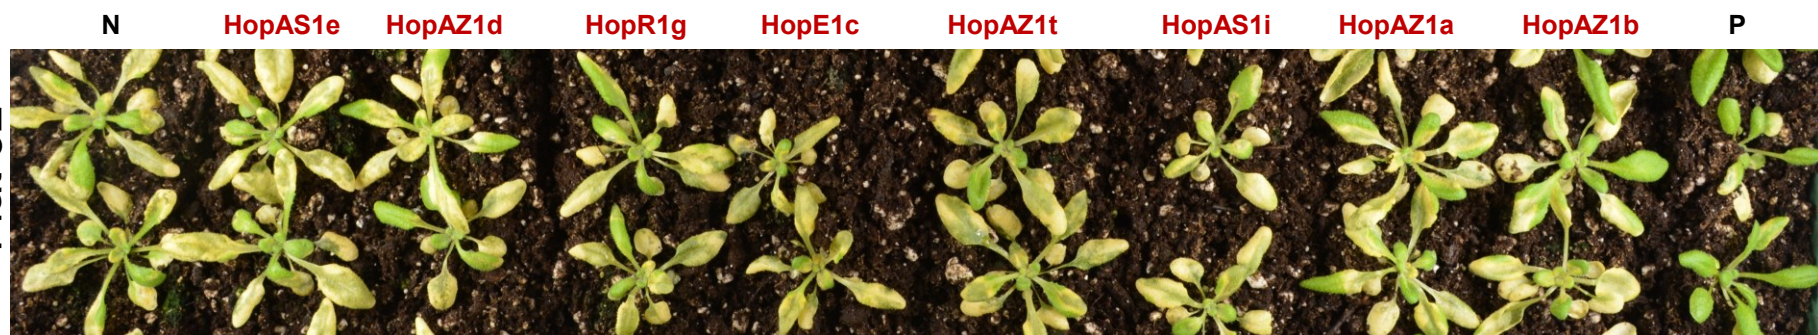

N HopAS1e HopAZ1d HopR1g HopE1c HopAZ1t HopAS1i HopAZ1a HopAZ1b P

100% 100% 73% 100% 100% 100% 100% 100% 94% 0%

Flat 33

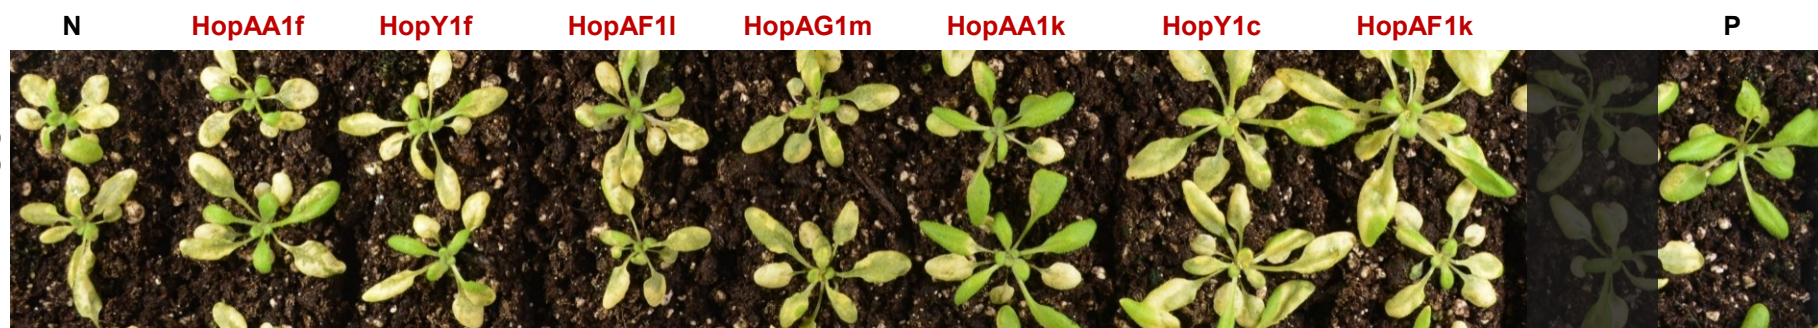

N HopAA1f HopY1f HopAF1l HopAG1m HopAA1k HopY1c HopAF1k P

100% 82% 98% 100% 100% 48% 100% 98% 0%

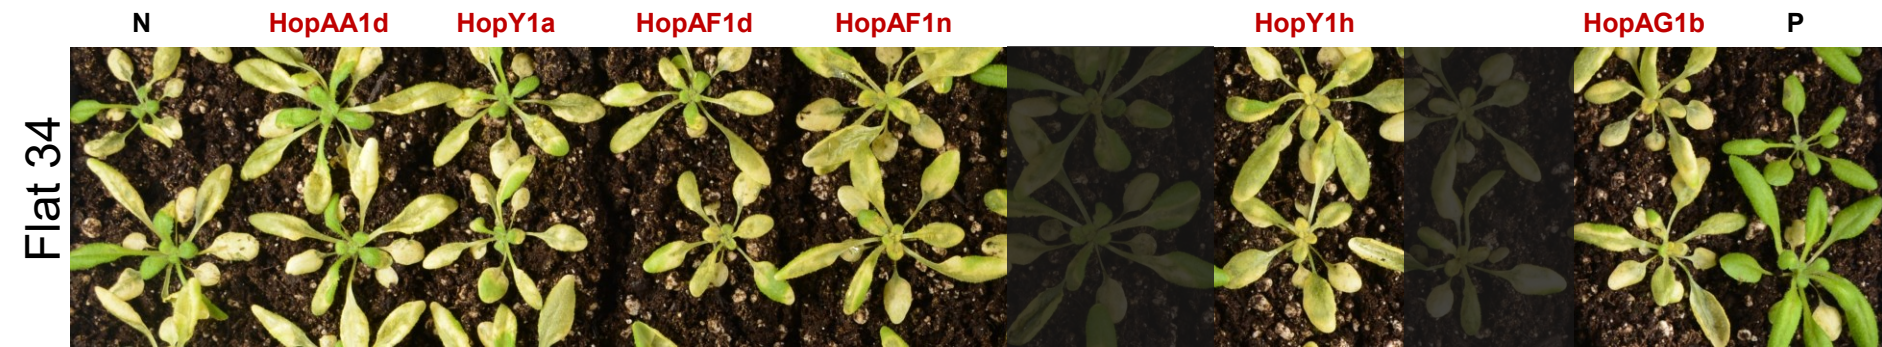

N 100% HopAA1d 100% HopY1a 100% HopAF1d 100% HopAF1n 100% HopY1h 100% HopAG1b 100% P 0%

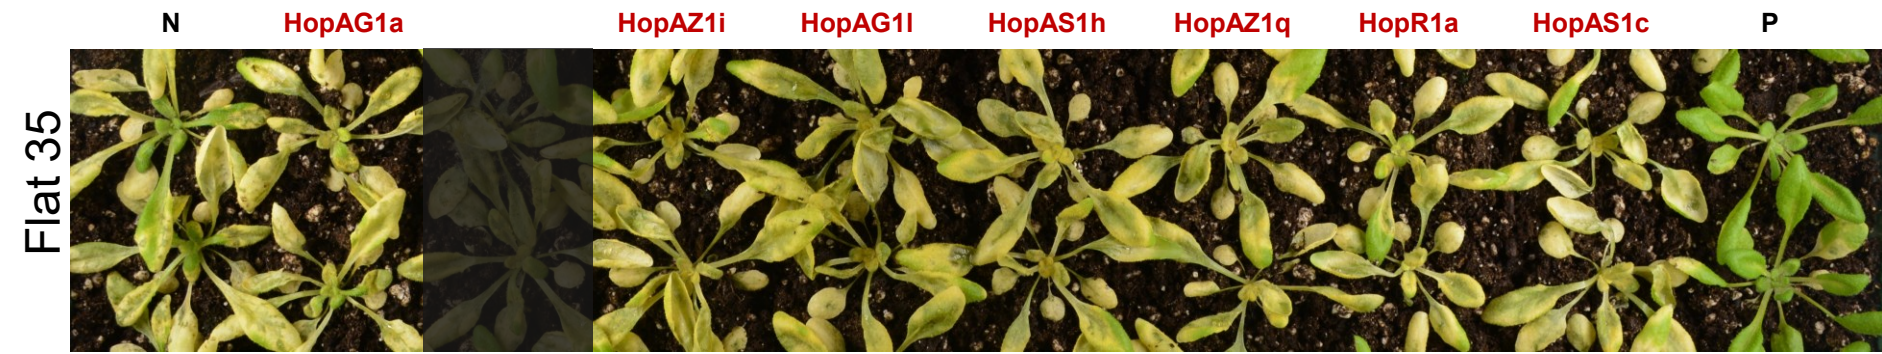

N 100% HopAG1a 100% HopAZ1i 100% HopAG1l 100% HopAS1h 100% HopAZ1q 100% HopR1a 100% HopAS1c 100% P 0%

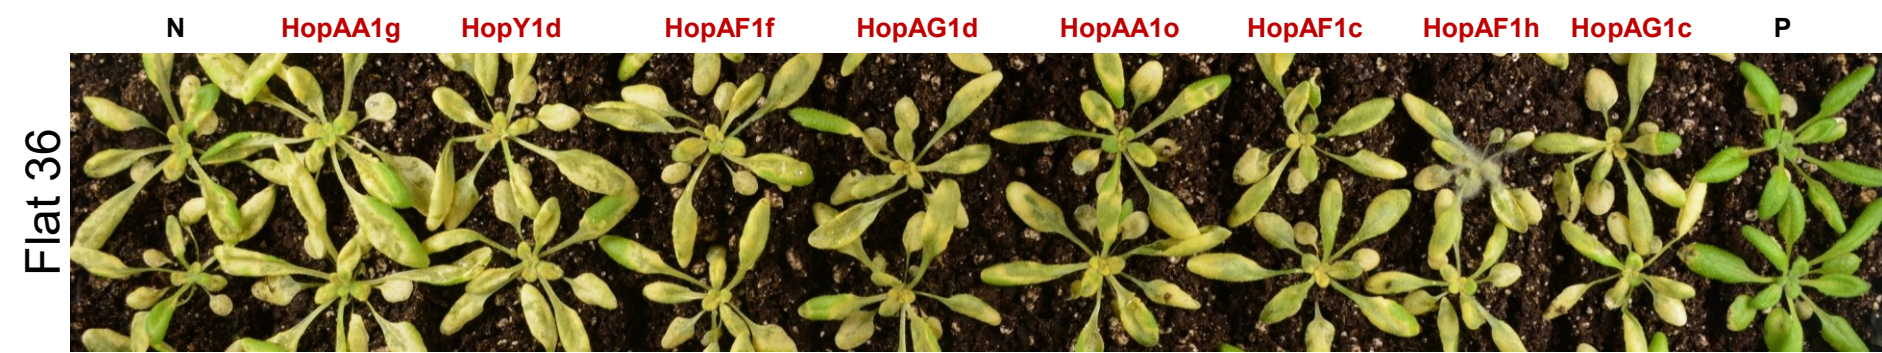

N 100% HopAA1g 90% HopY1d 100% HopAF1f 100% HopAG1d 100% HopAA1o 93% HopAF1c 100% HopAF1h 100% HopAG1c 100% P 0%

Flat 37

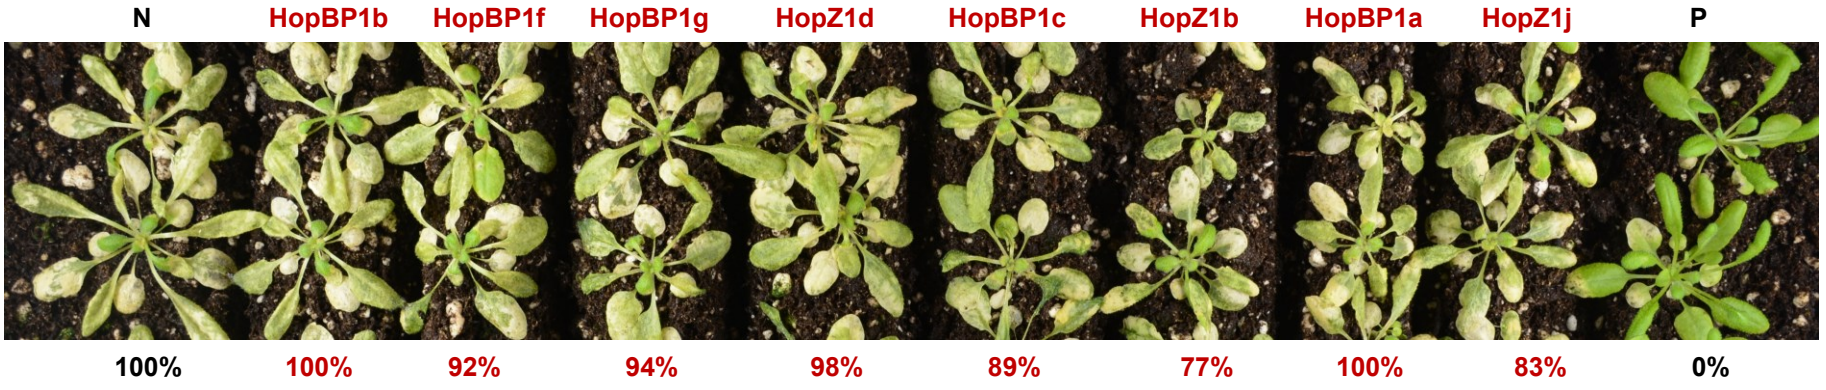

Flat 38

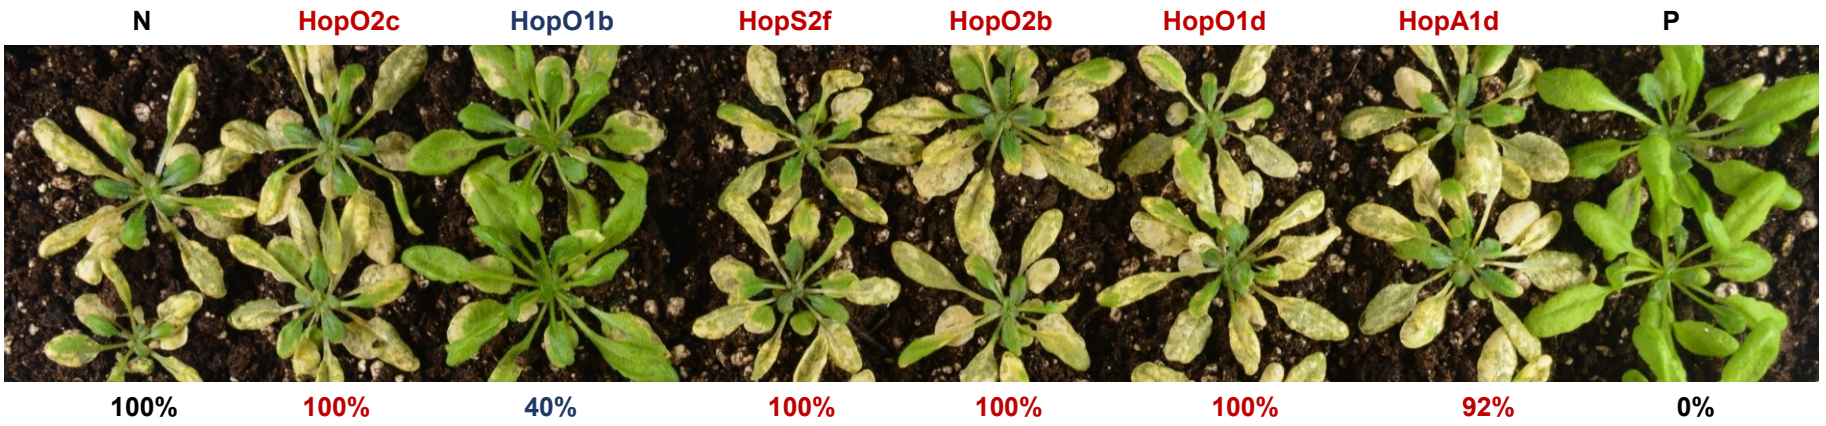

Flat 39

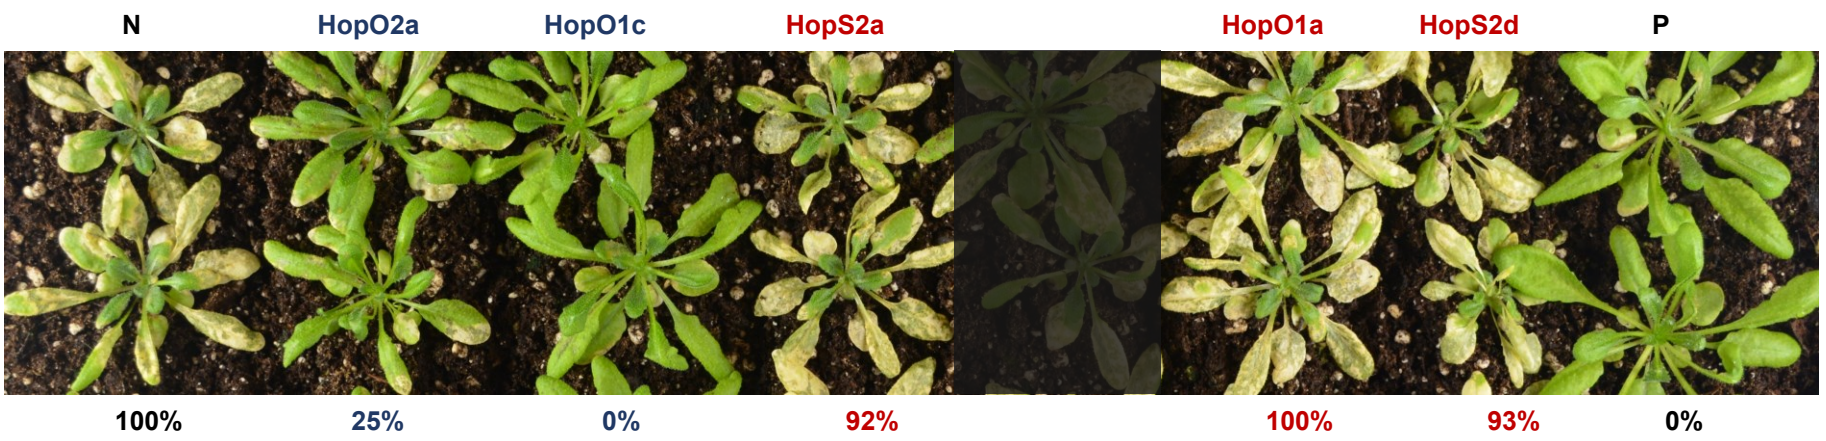

Flat 40

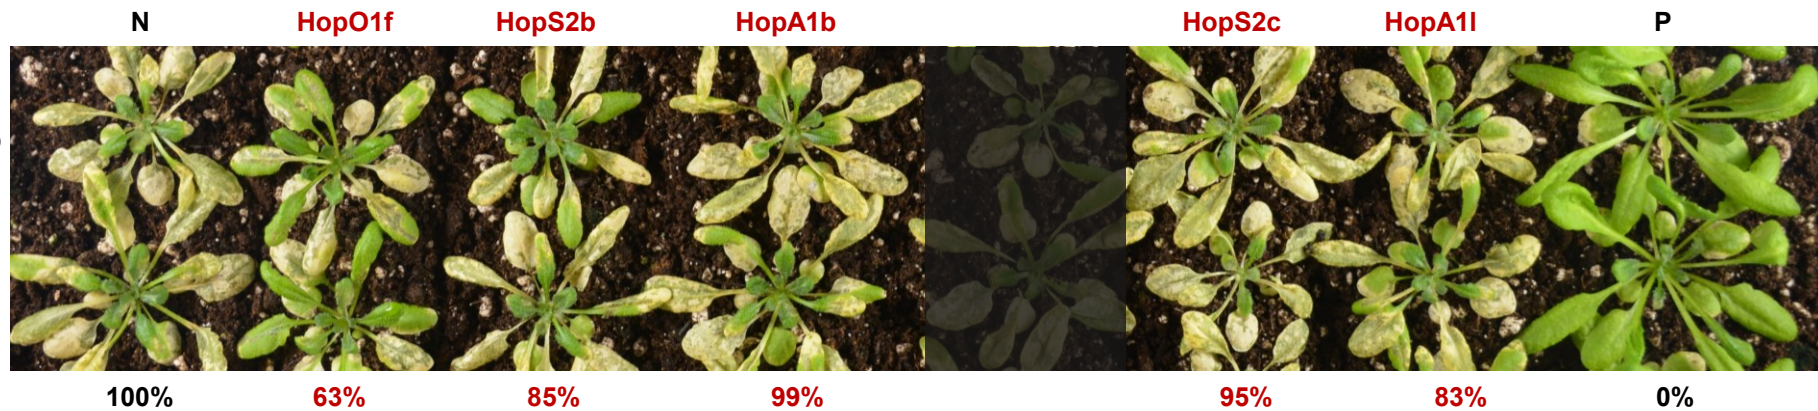

Flat 41

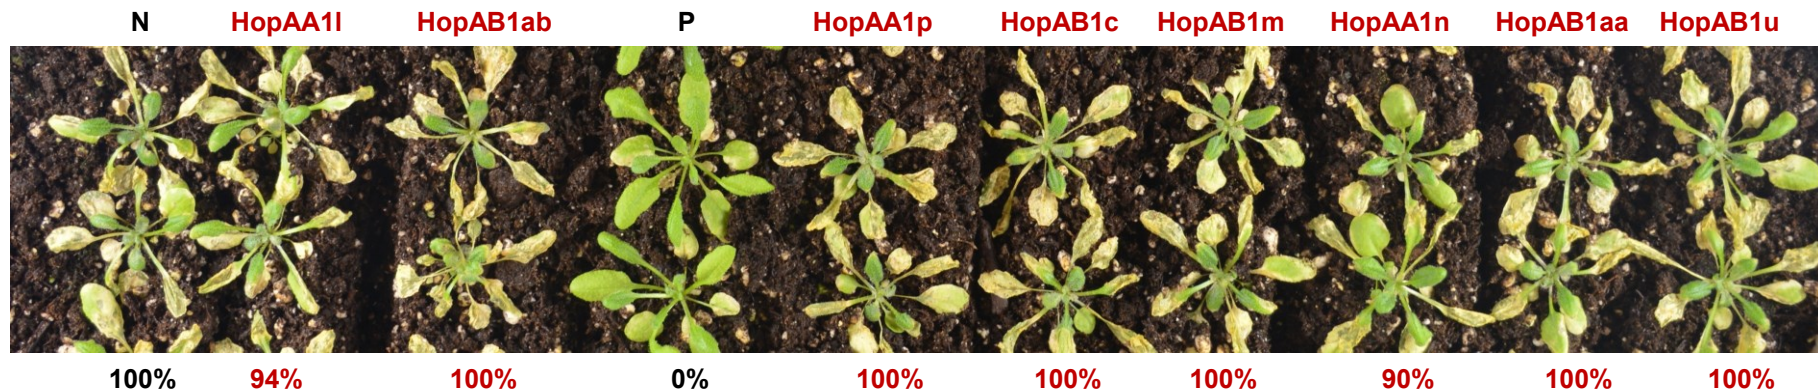

Flat 84

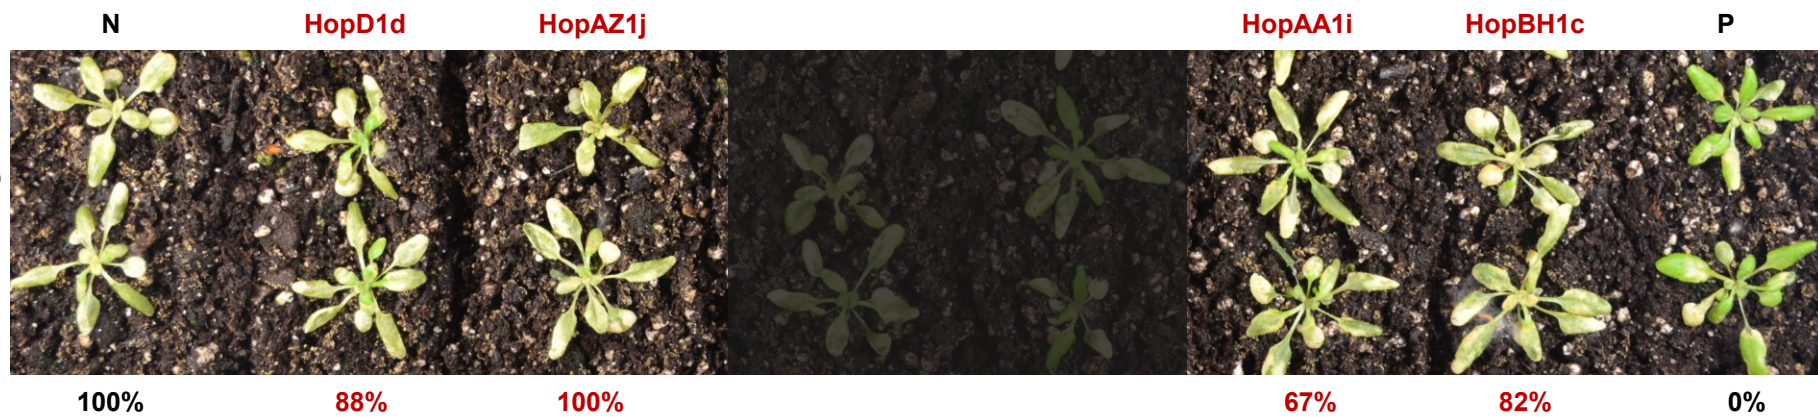

Flat 43

N HopBI1a HopAX1a HopAX1f HopAX1d HopBH1a HopT1d HopAZ1g HopAZ1k P

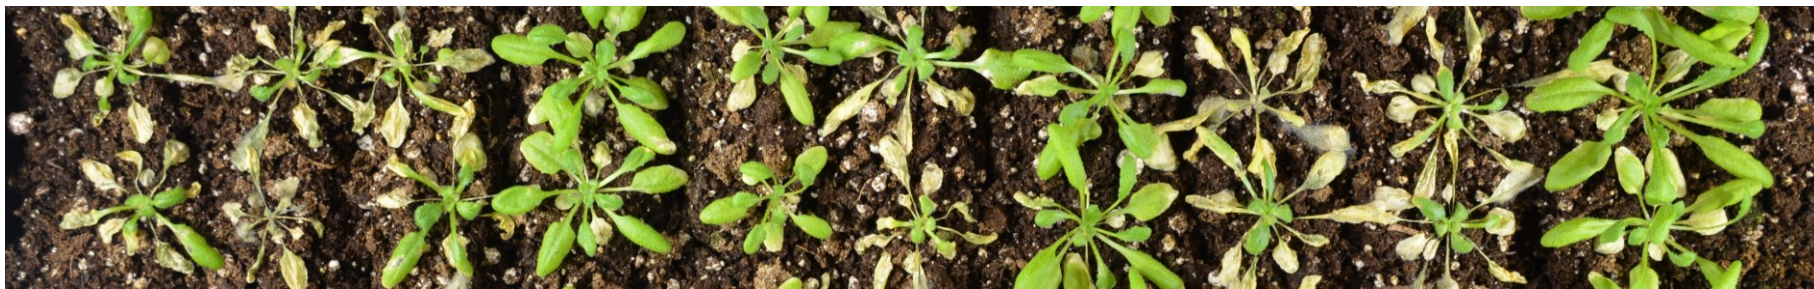

100% 100% 88% 0% 21% 92% 36% 100% 100% 0%

Flat 44

N HopAZ1f HopBF1a HopBF1c HopBM1a HopBM1b HopG1a P

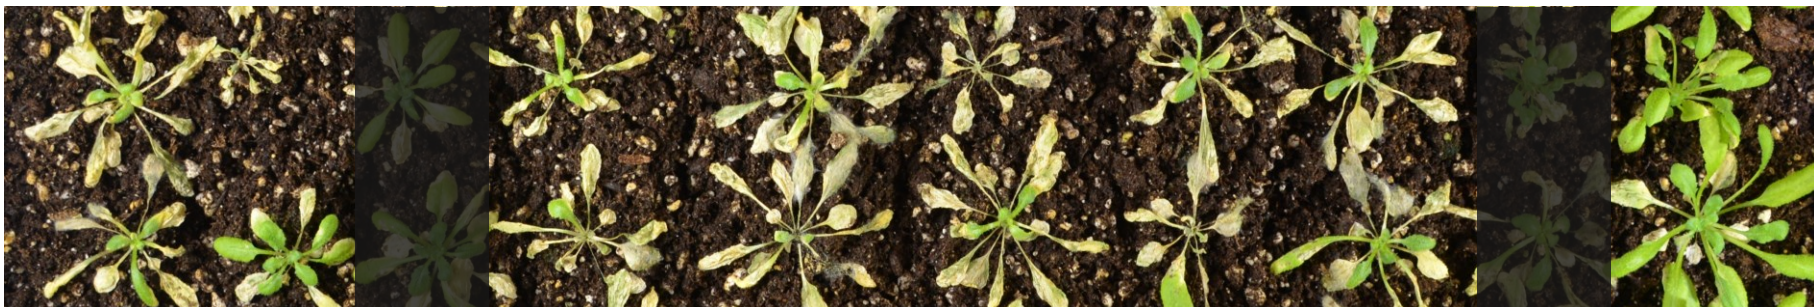

100% 53% 85% 81% 65% 66% 66% 0%

Flat 85

P N HopBN1d

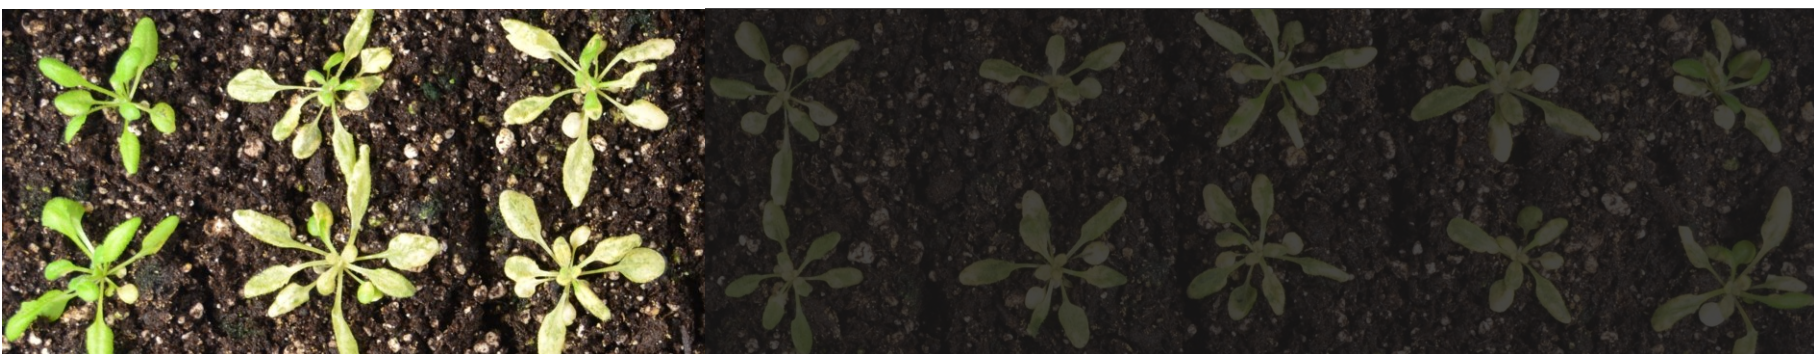

0% 100% 96%

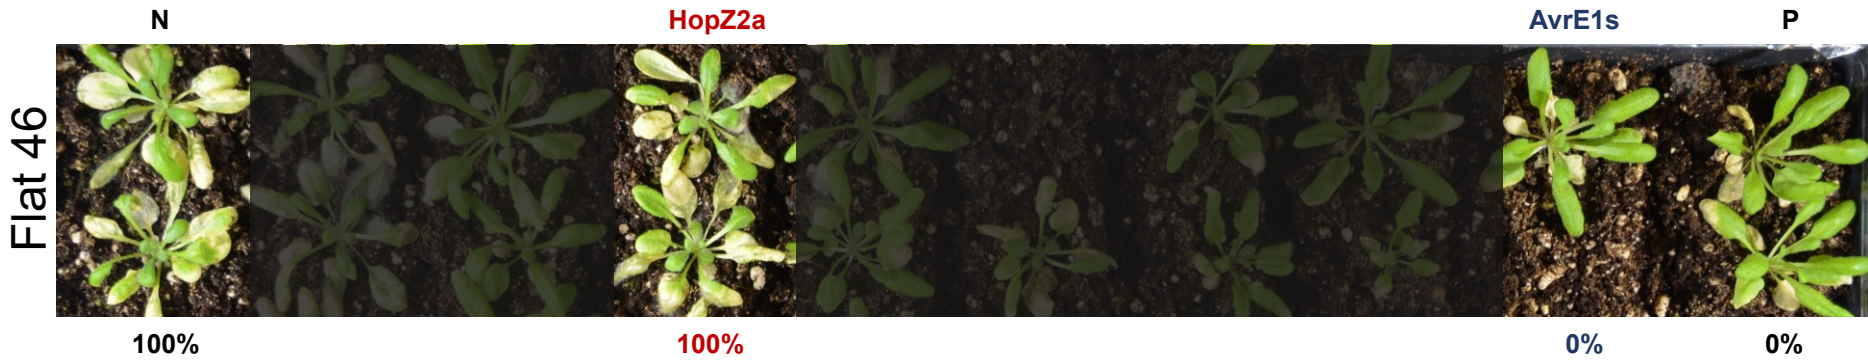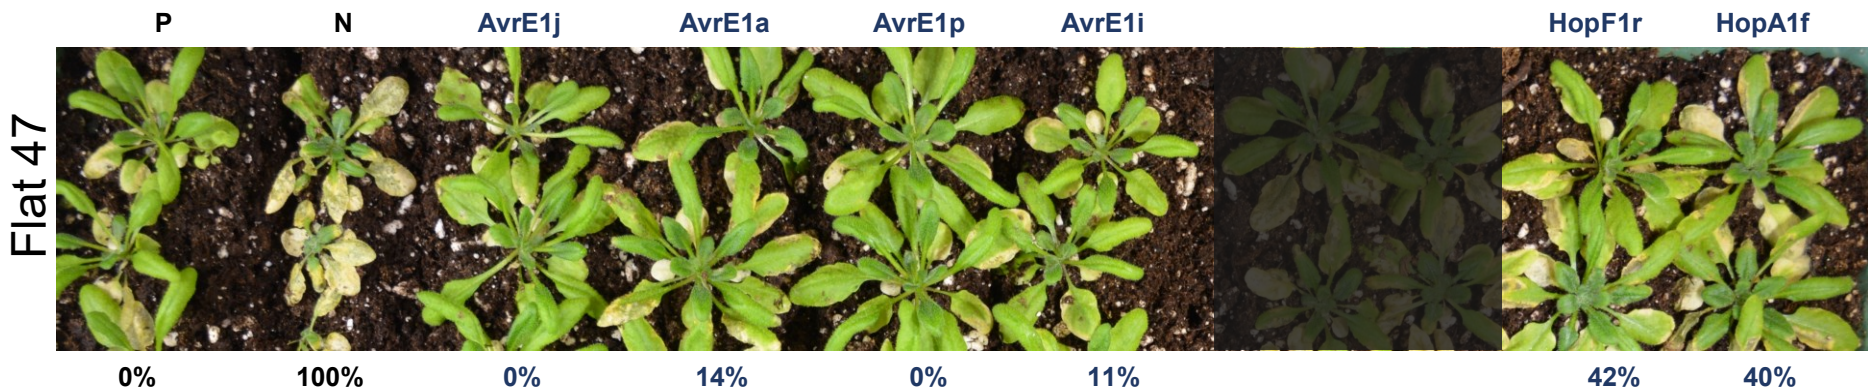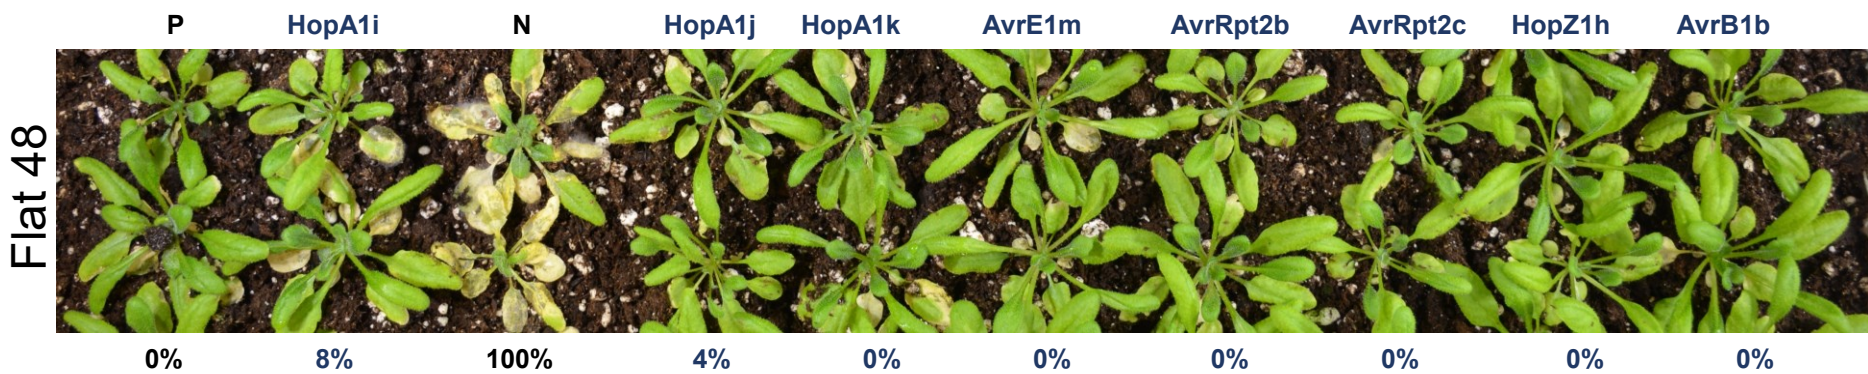



Flat 49

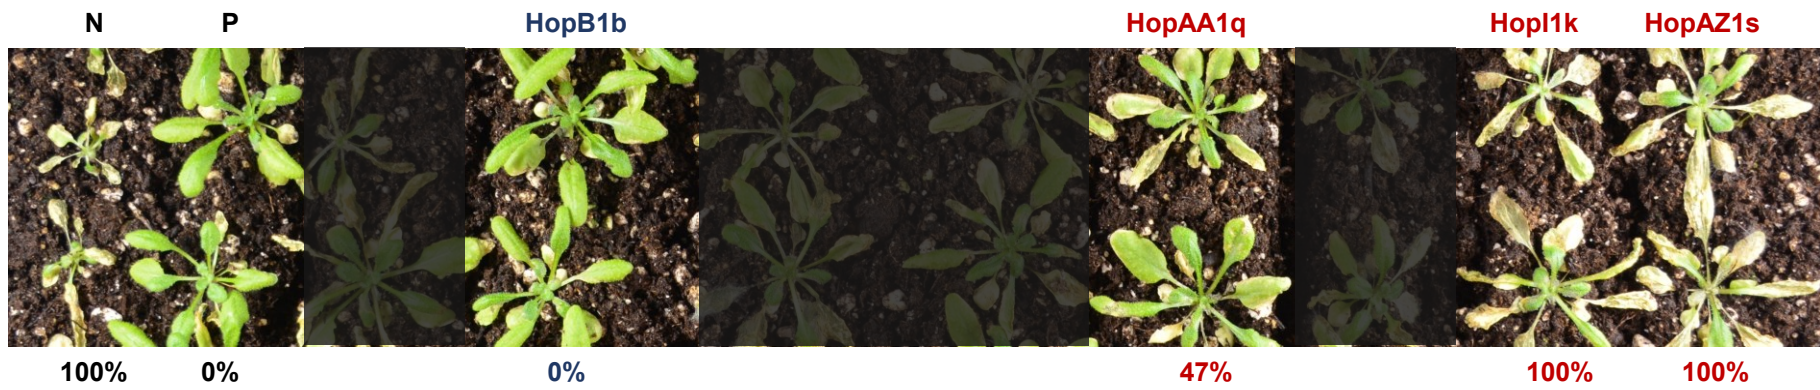

Flat 50

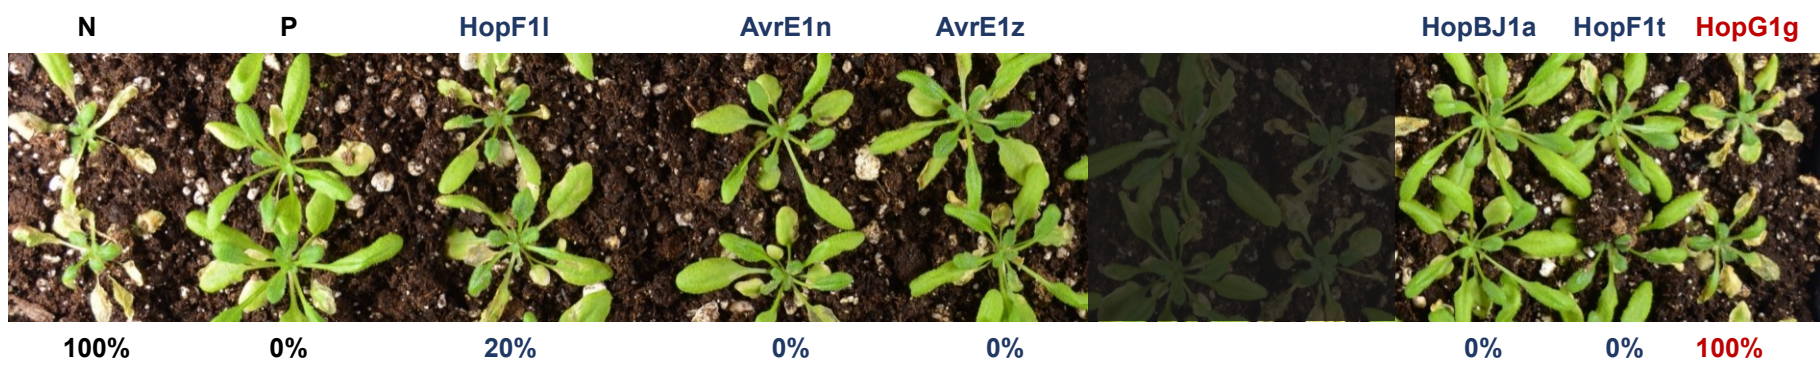

Flat 51

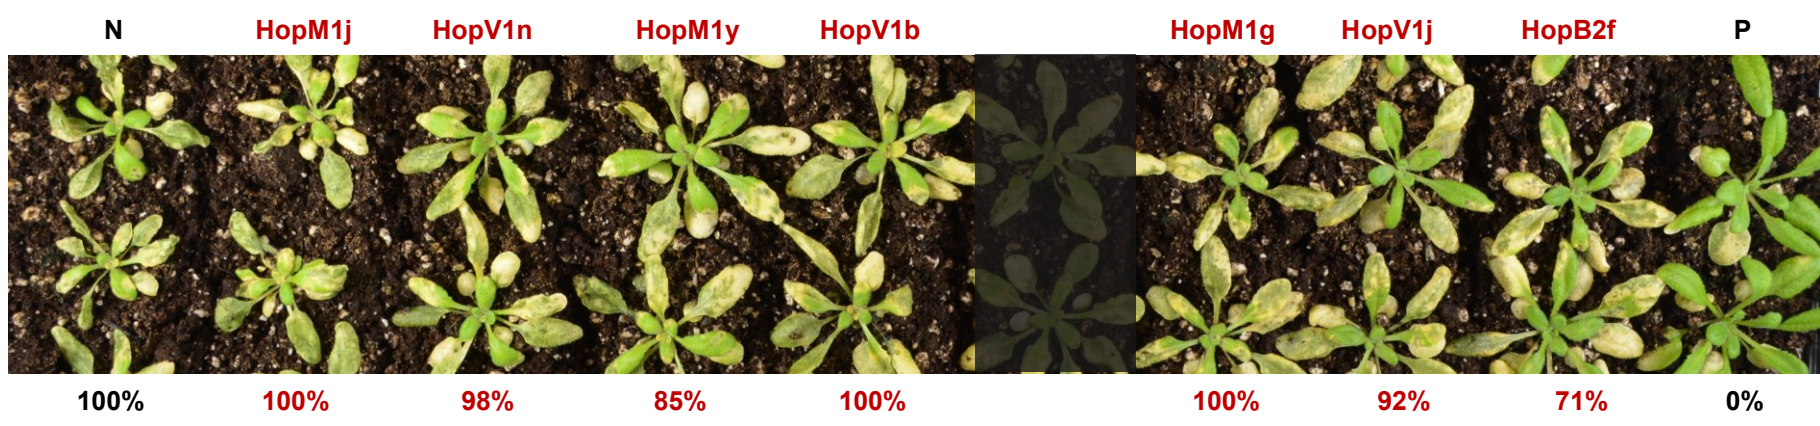

Flat 82

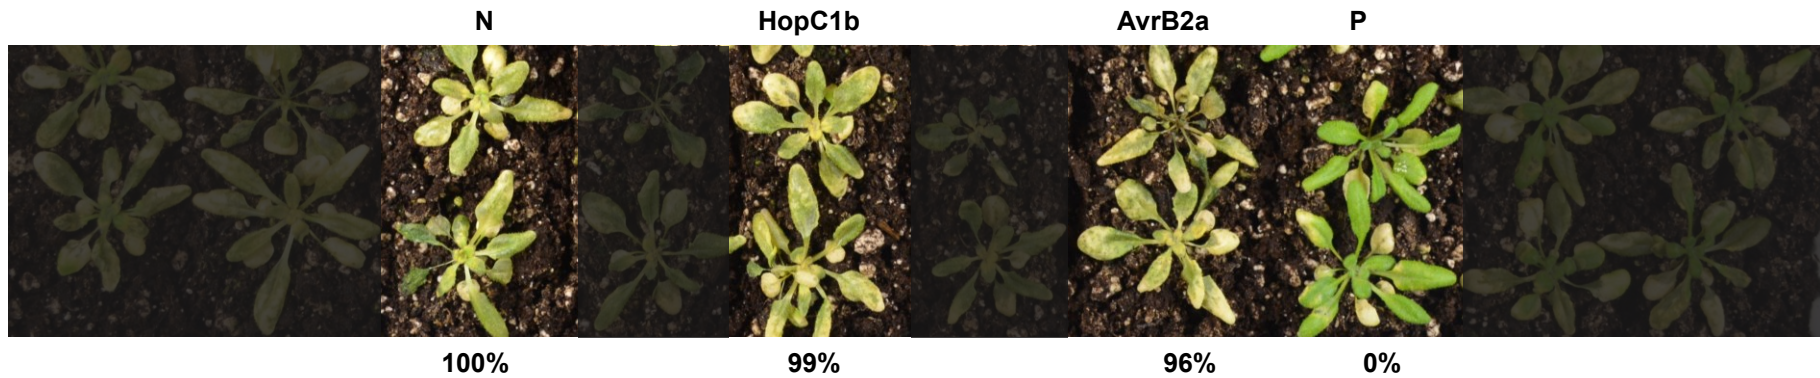

Flat 53

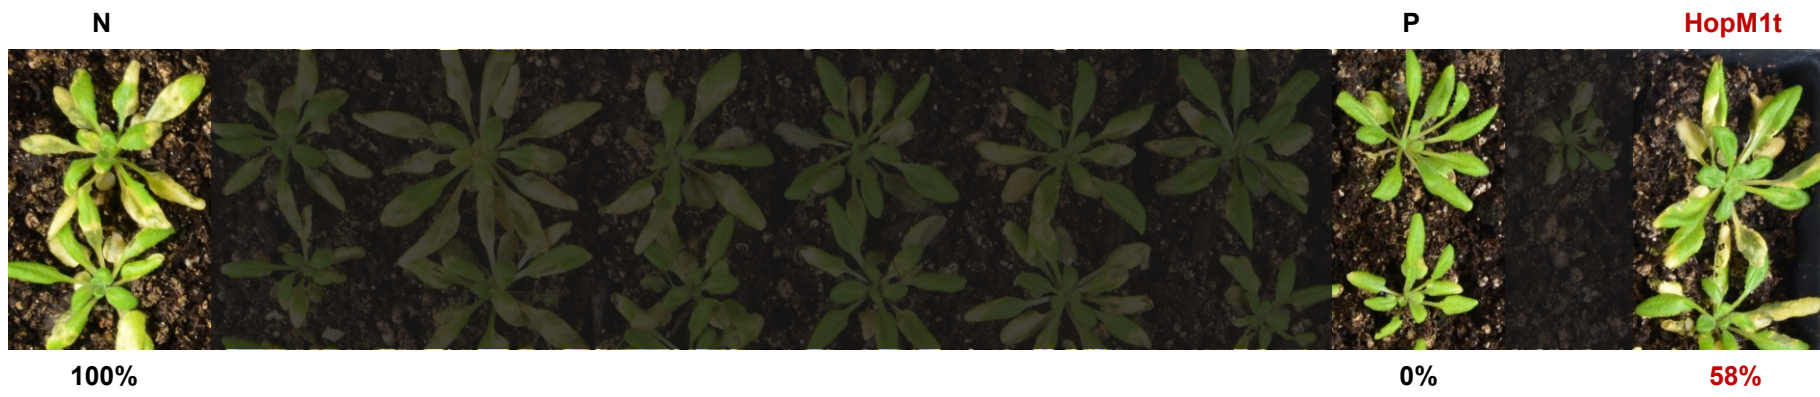

Flat 54

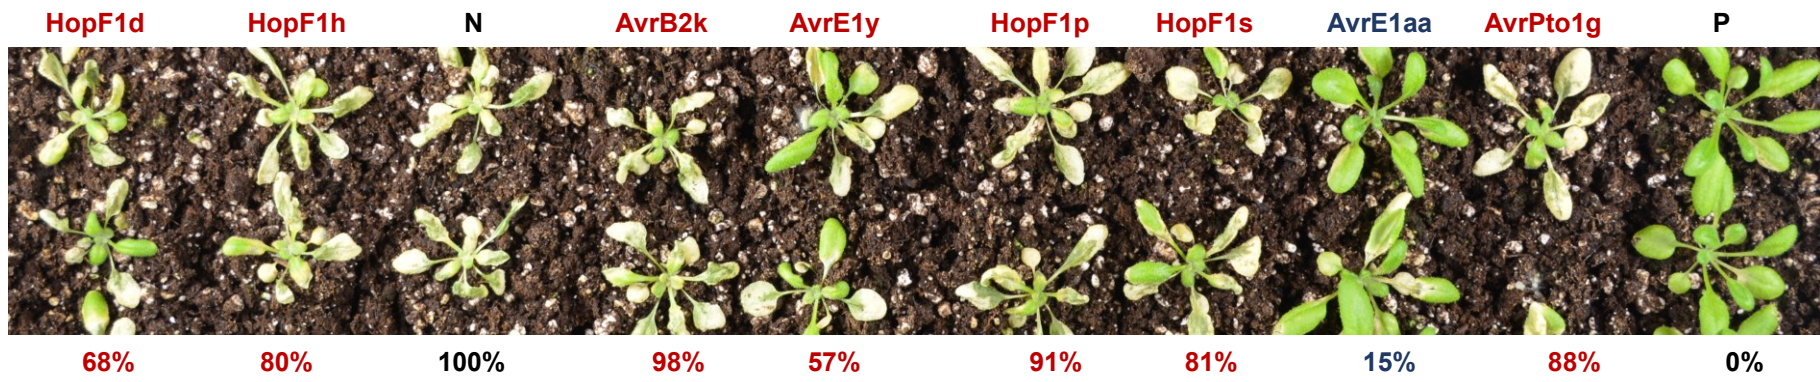

Flat 55

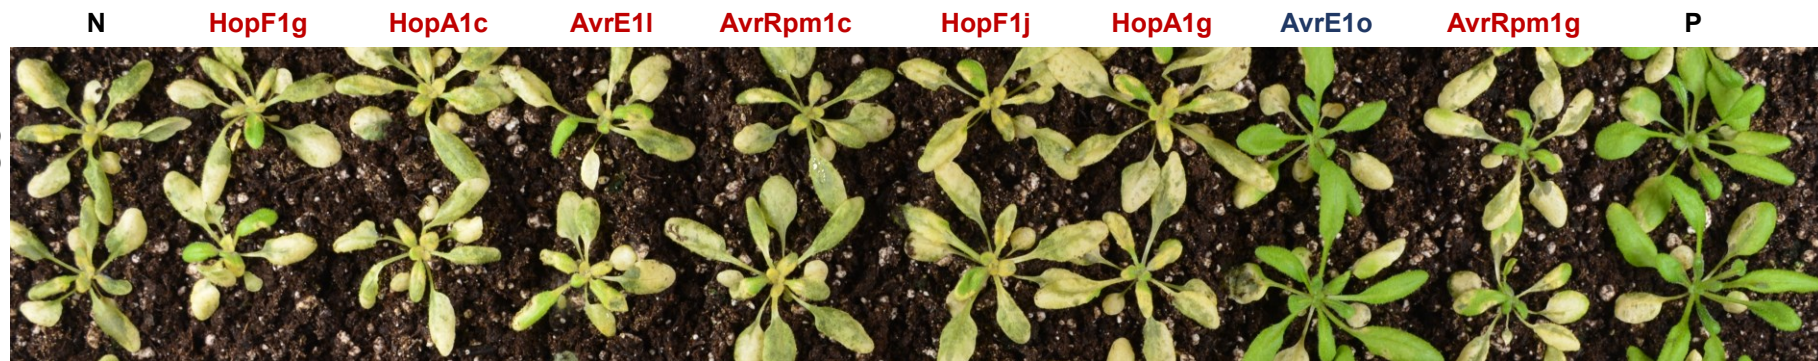

N HopF1g HopA1c AvrE1l AvrRpm1c HopF1j HopA1g AvrE1o AvrRpm1g P  
 100% 100% 100% 100% 100% 100% 100% 23% 75% 0%

Flat 56

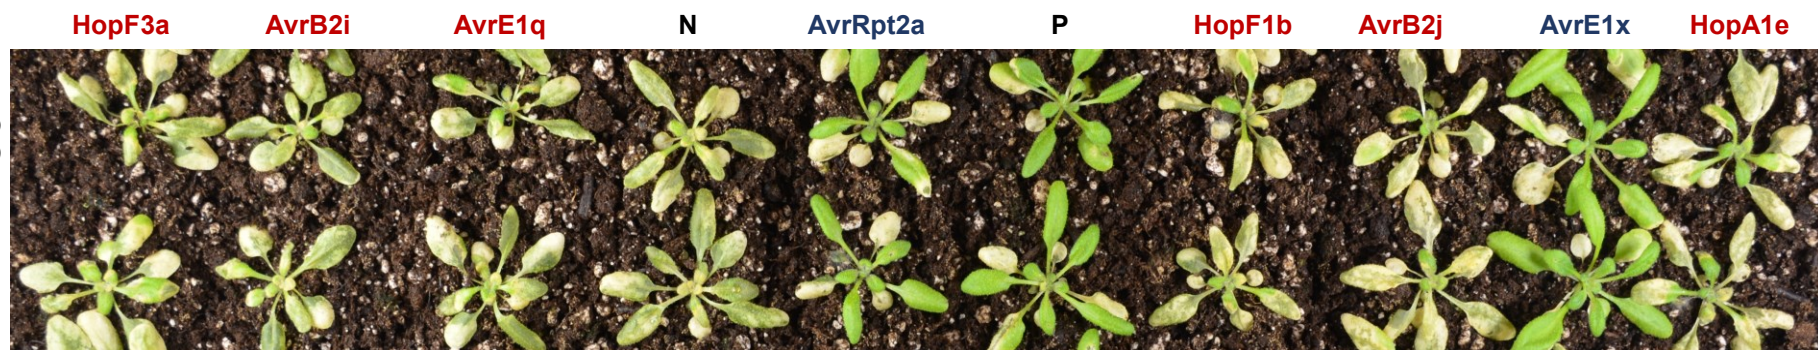

HopF3a AvrB2i AvrE1q N AvrRpt2a P HopF1b AvrB2j AvrE1x HopA1e  
 100% 99% 96% 100% 9% 0% 100% 100% 1% 88%

Flat 57

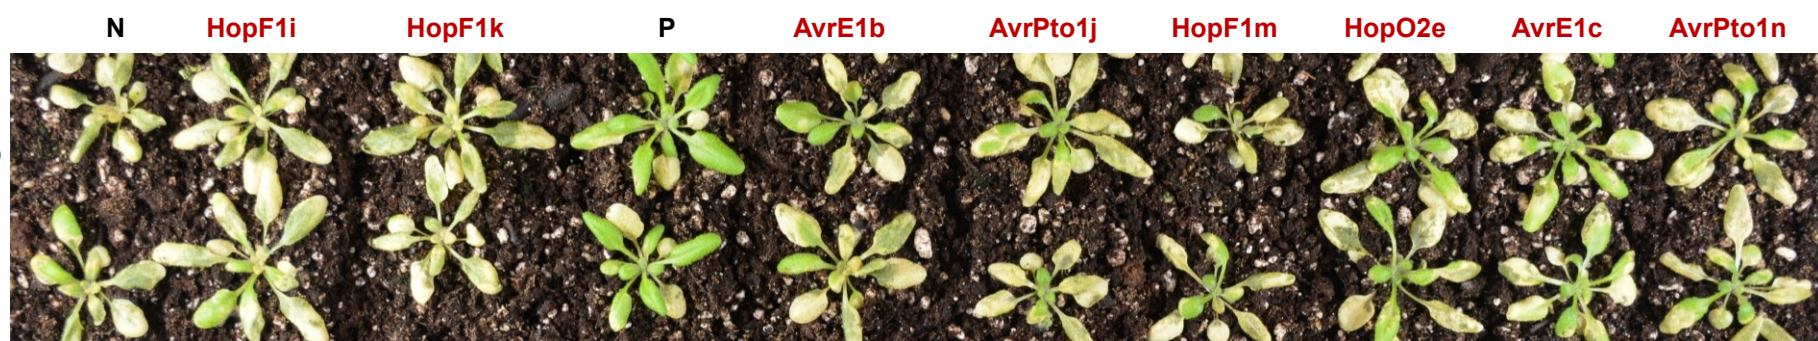

N HopF1i HopF1k P AvrE1b AvrPto1j HopF1m HopO2e AvrE1c AvrPto1n  
 100% 100% 100% 0% 82% 96% 94% 69% 46% 88%

Flat 58

HopAG1h HopAI1f N HopAA1j HopAG1j HopAI1h HopAB1w HopAG1n P HopAIi

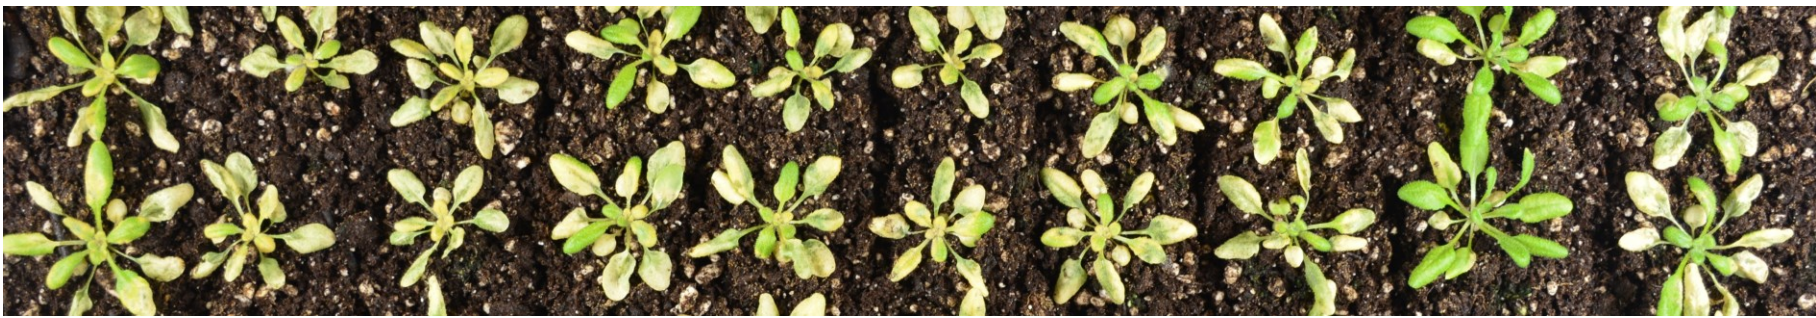

86% 100% 100% 87% 83% 86% 87% 71% 0% 54%

Flat 59

HopAH1t HopA1p HopAG1e HopAH1y HopA1q N HopAG1f P HopAIe HopAA1h

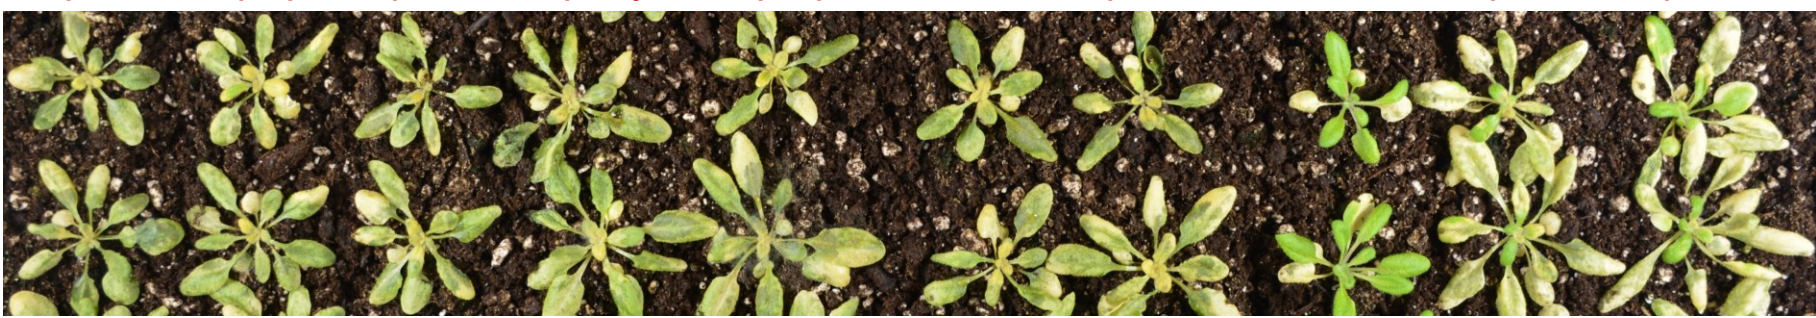

100% 100% 100% 100% 100% 100% 100% 0% 100% 100%

Flat 60

N HopA1h HopAF1g HopAG1p HopA1m HopAF1i HopAH1aa HopA1n HopAF1m P

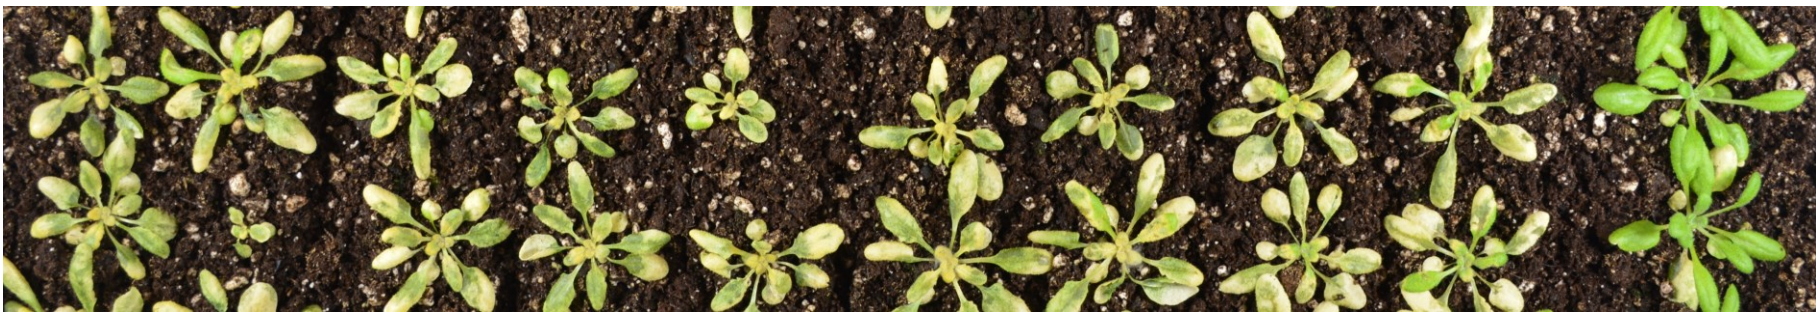

100% 100% 100% 96% 100% 100% 100% 100% 100% 0%

Flat 61

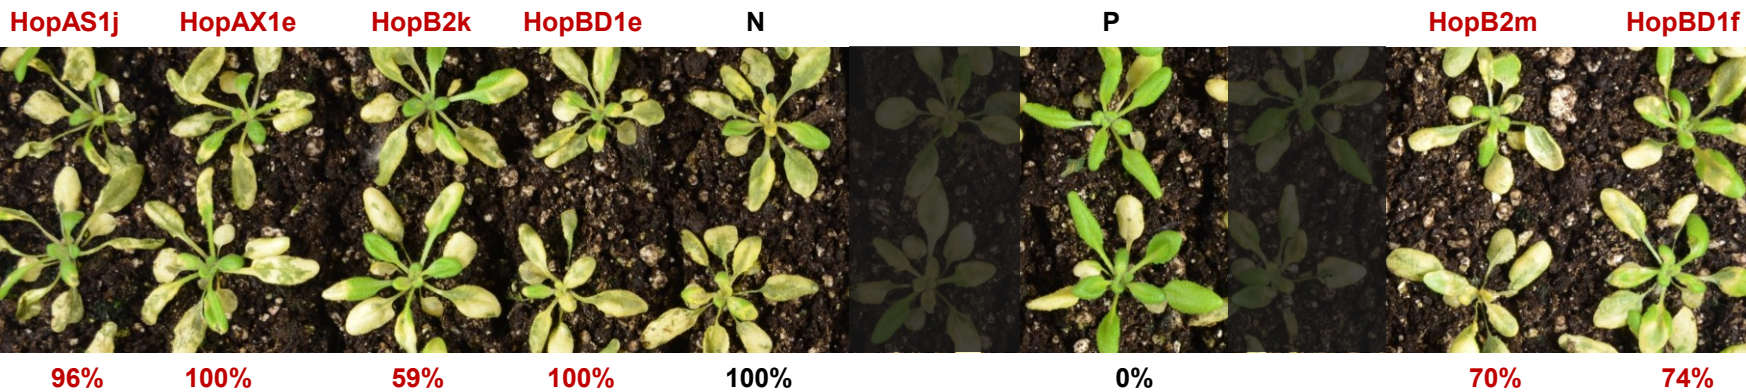

Flat 62

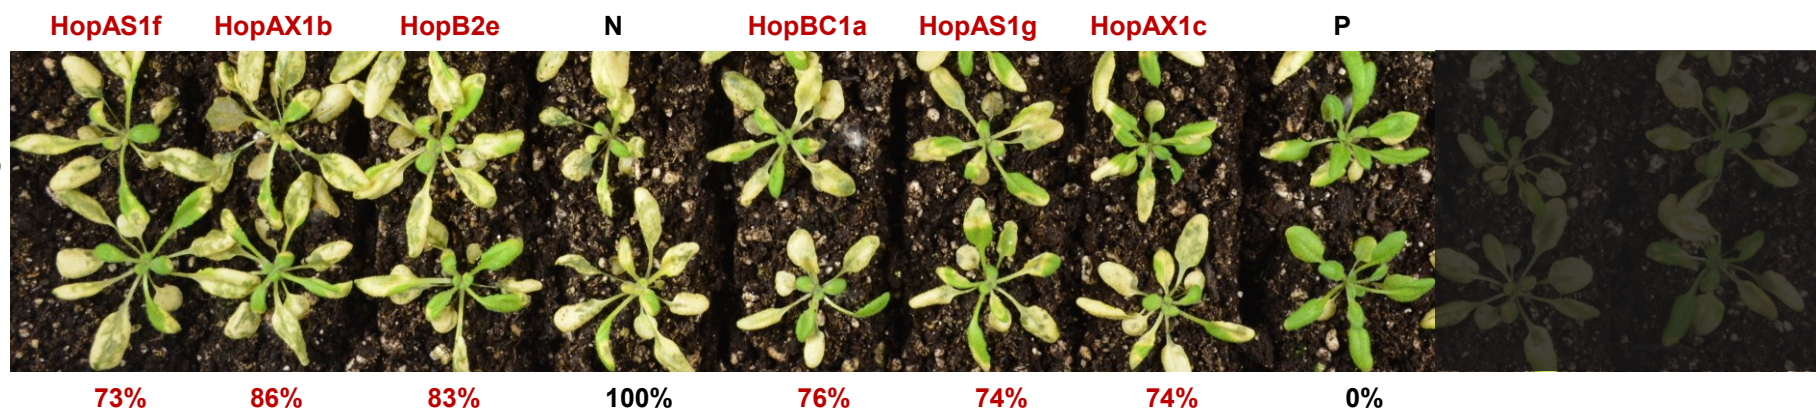

Flat 63

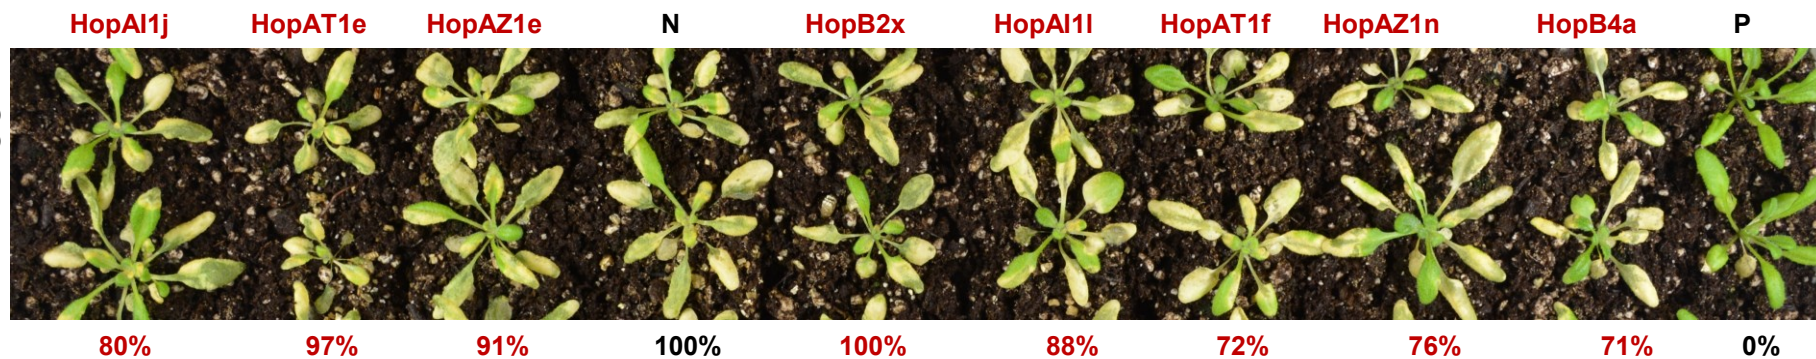

Flat 64

HopAI1n      N      HopAT1h      HopB1c      HopBA1b      P      HopAI1o      HopAU1b      HopB1e      HopBA1c

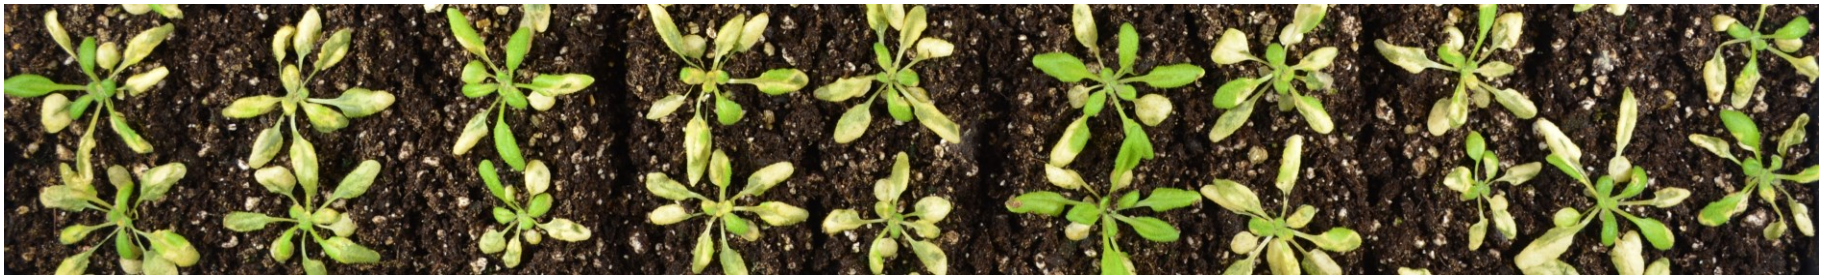

75%      100%      83%      100%      100%      0%      100%      100%      95%      79%

Flat 65

HopBD1h      HopBN1b      N      HopBP1e      HopBD1i      P      HopBN1c      HopBR1a      HopBF1b

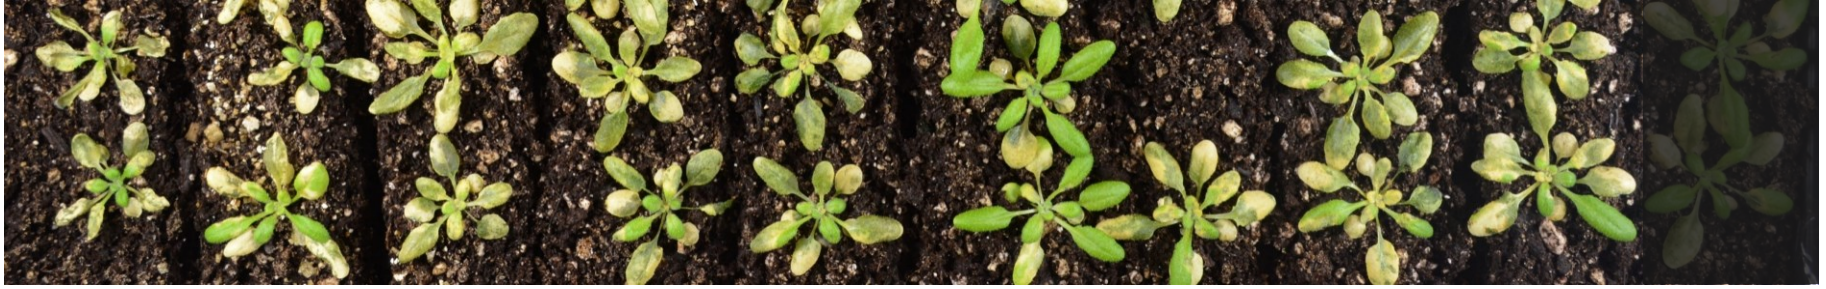

87%      48%      100%      87%      79%      0%      74%      67%      61%

Flat 66

HopBN1g      HopD1h      N      HopBH1d      HopBN1h      HopD1k      HopBN1a      HopBP1d      P

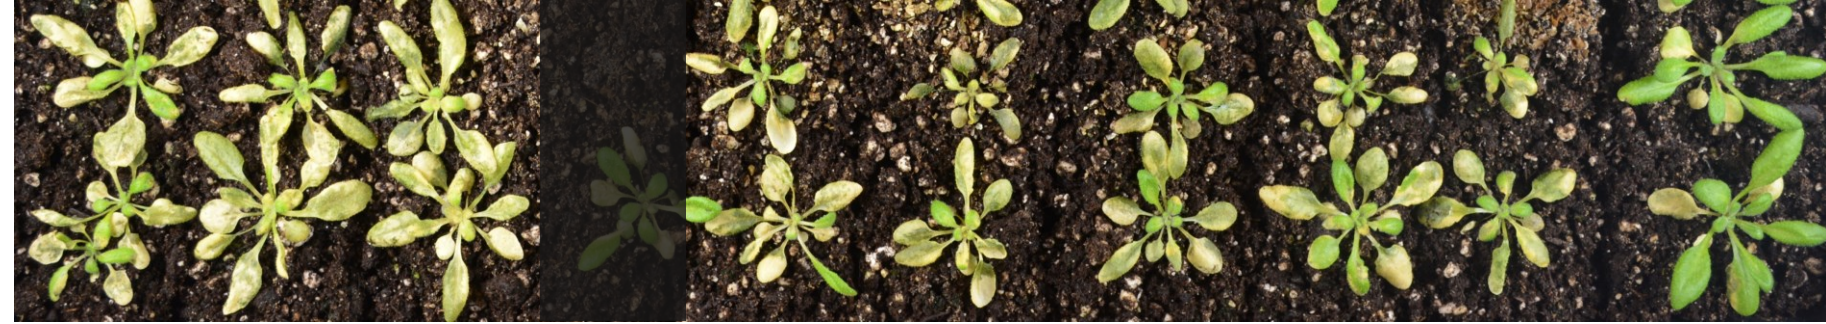

71%      96%      100%      69%      82%      71%      65%      60%      0%

Flat 67

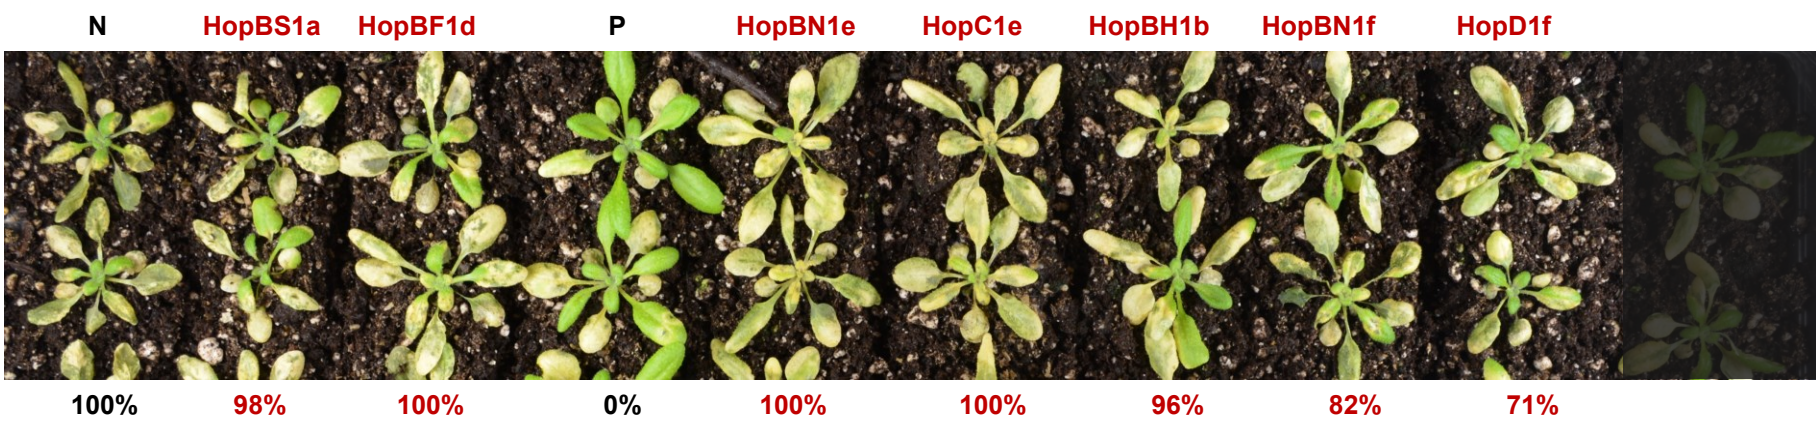

Flat 68

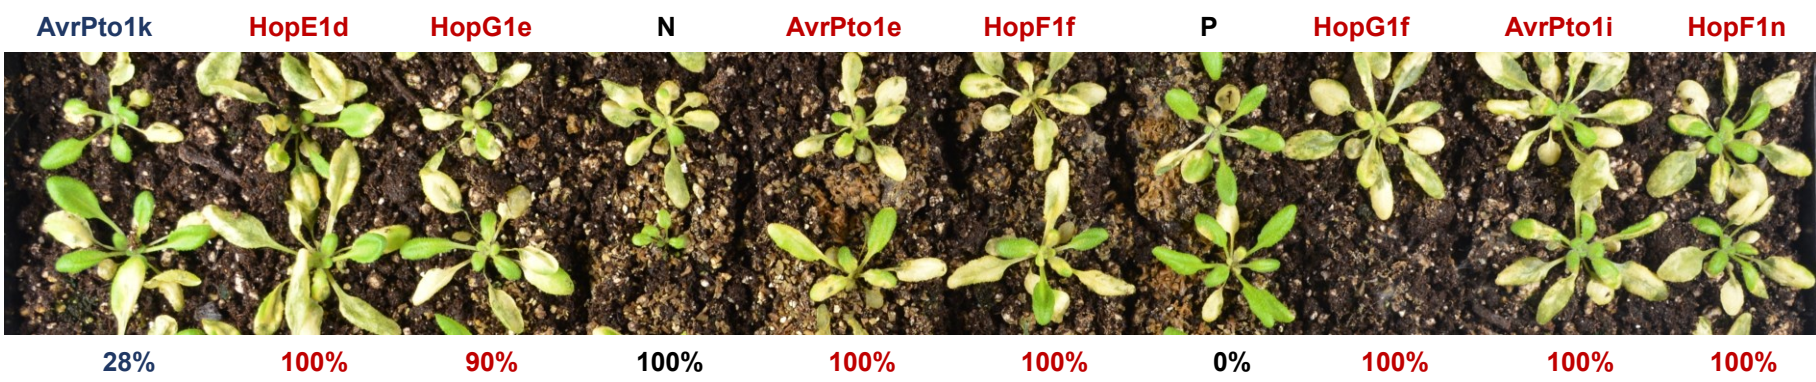

Flat 69

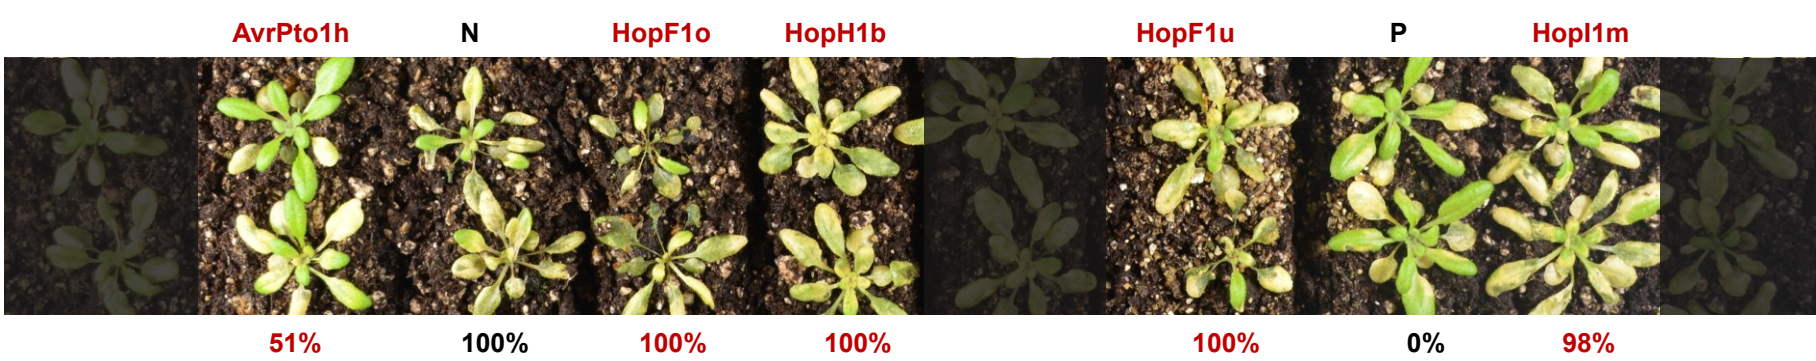

Flat 70

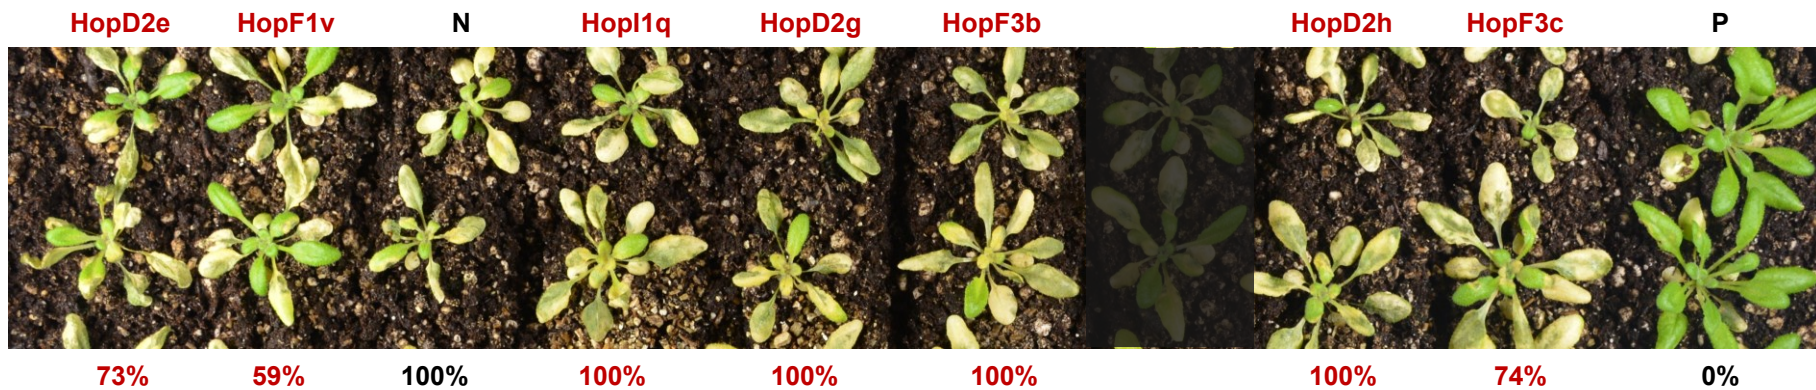

Flat 83

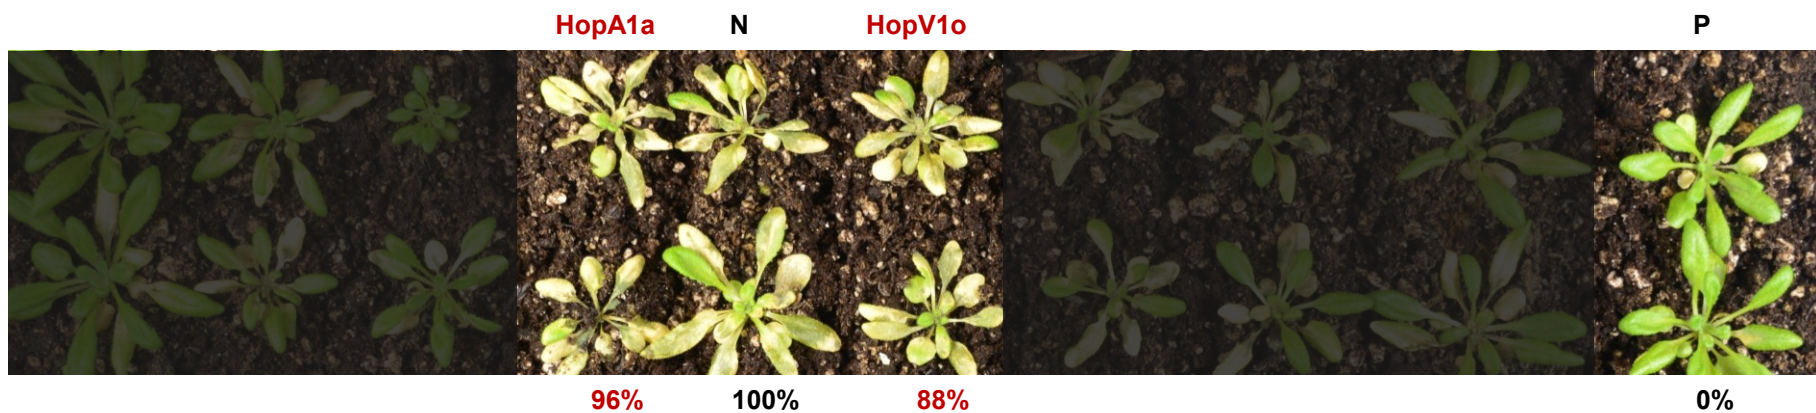

Flat 72

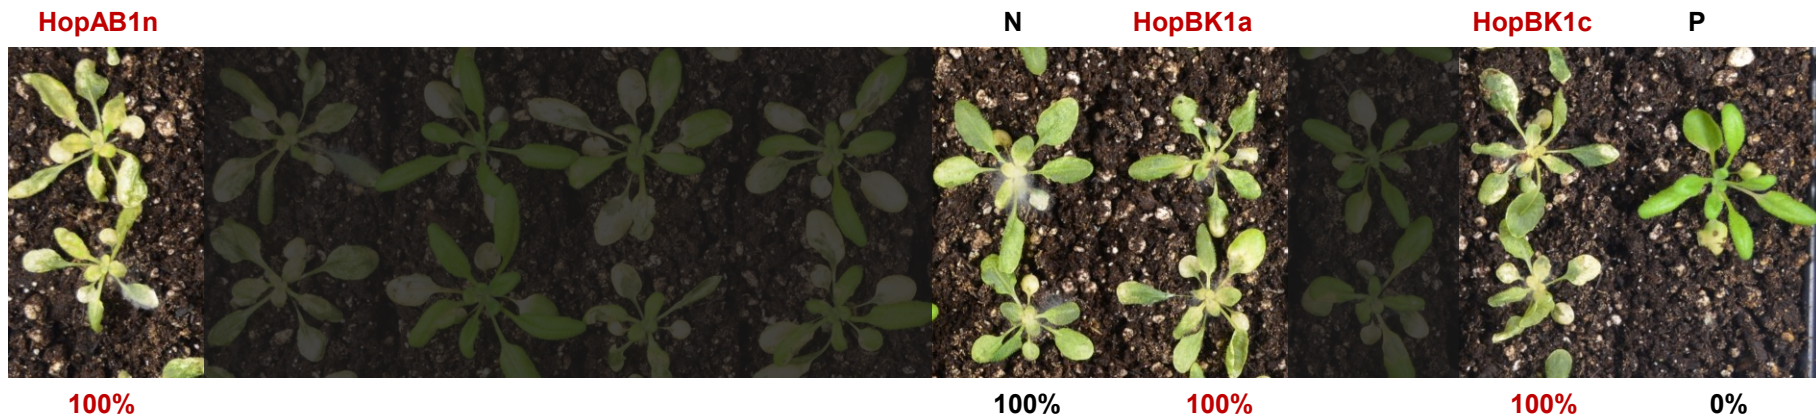



HopAB1l

HopZ2c

N

HopM1x

HopV1g

P

HopAB1q

HopZ4a

Flat 73

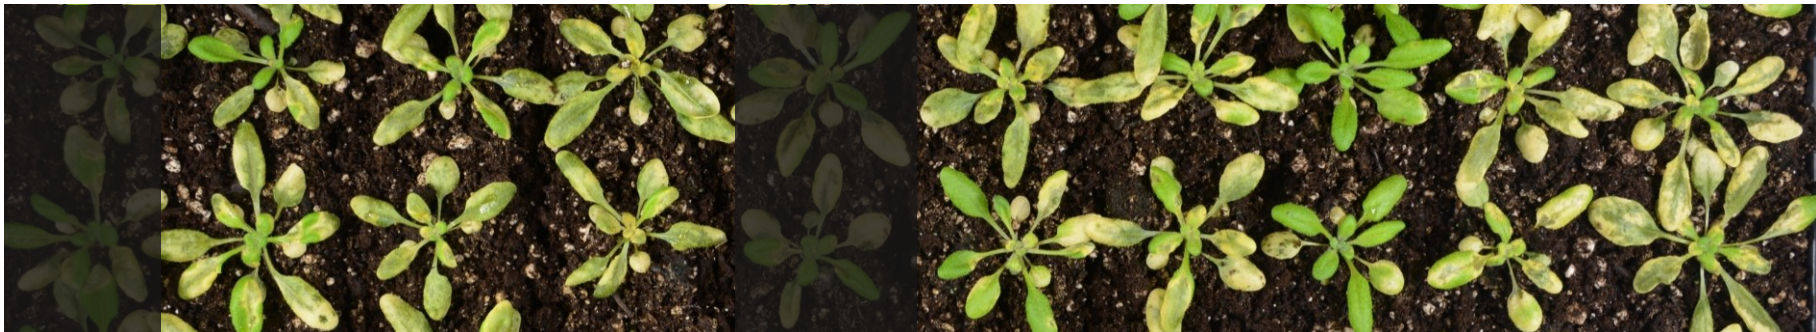

88%

94%

100%

87%

85%

0%

98%

95%

HopAT1d

AvrE1f

N

HopM1af

HopM1h

HopAA1v

HopAX1g

AvrE1e

P

HopM1v

Flat 74

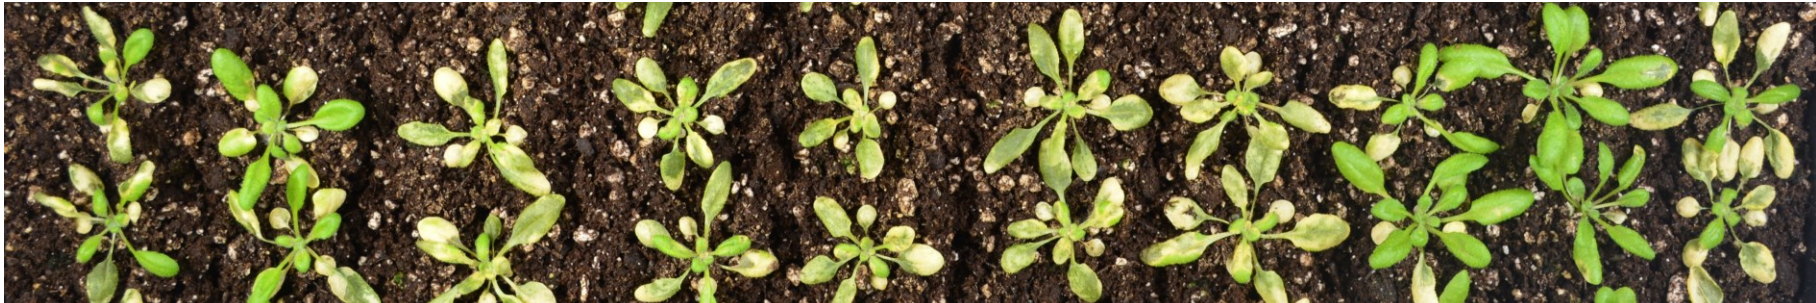

74%

26%

100%

85%

100%

100%

100%

91%

0%

74%

AvrE1h

N

HopM1b

HopV1k

HopAB1k

P

HopZ2b

AvrE1g

Flat 75

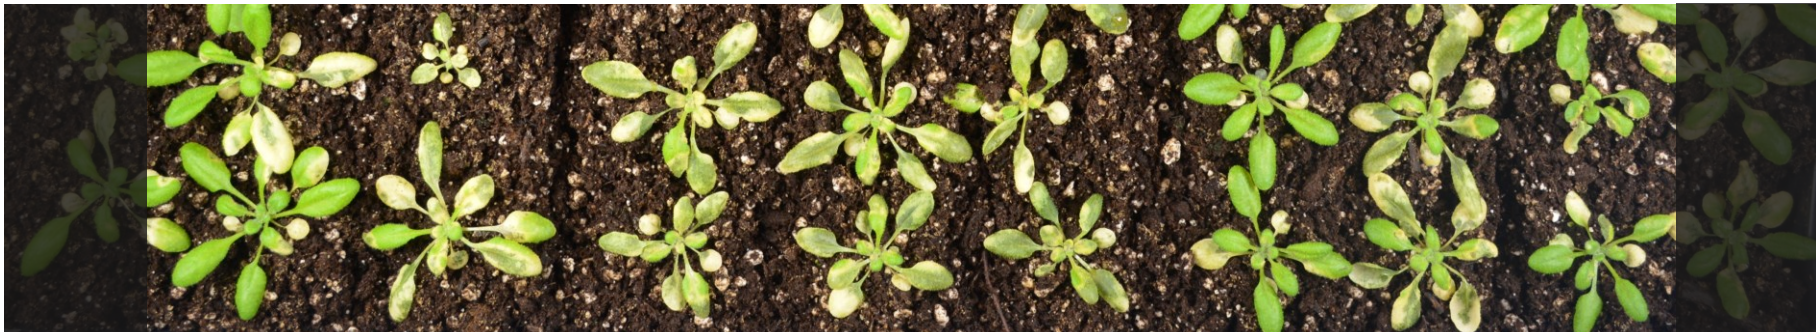

8%

100%

96%

100%

84%

0%

90%

29%

Flat 76

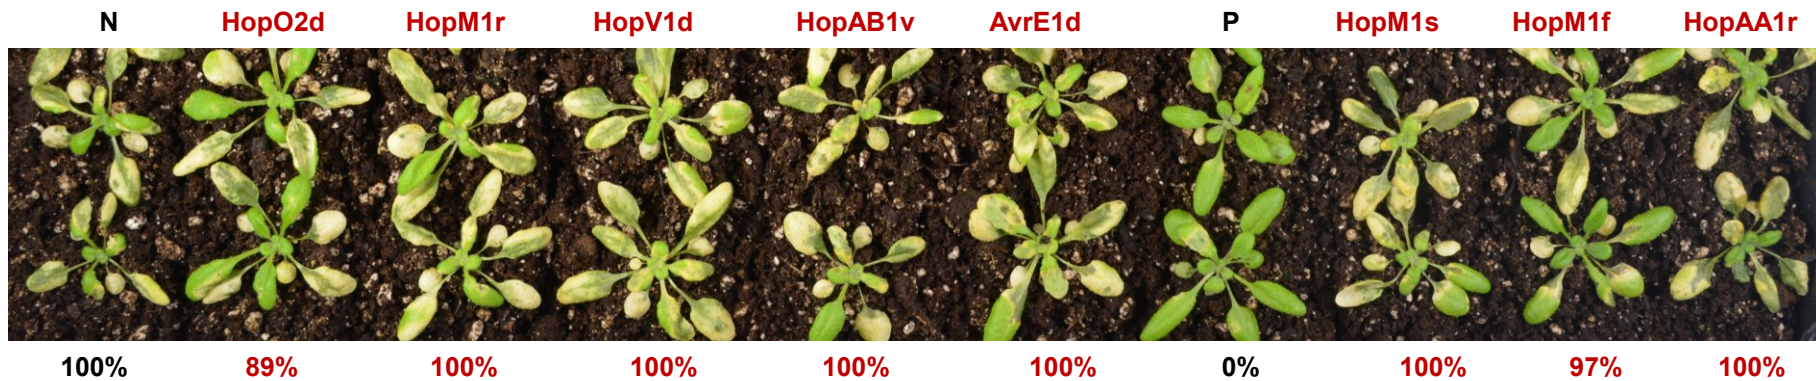

Flat 77

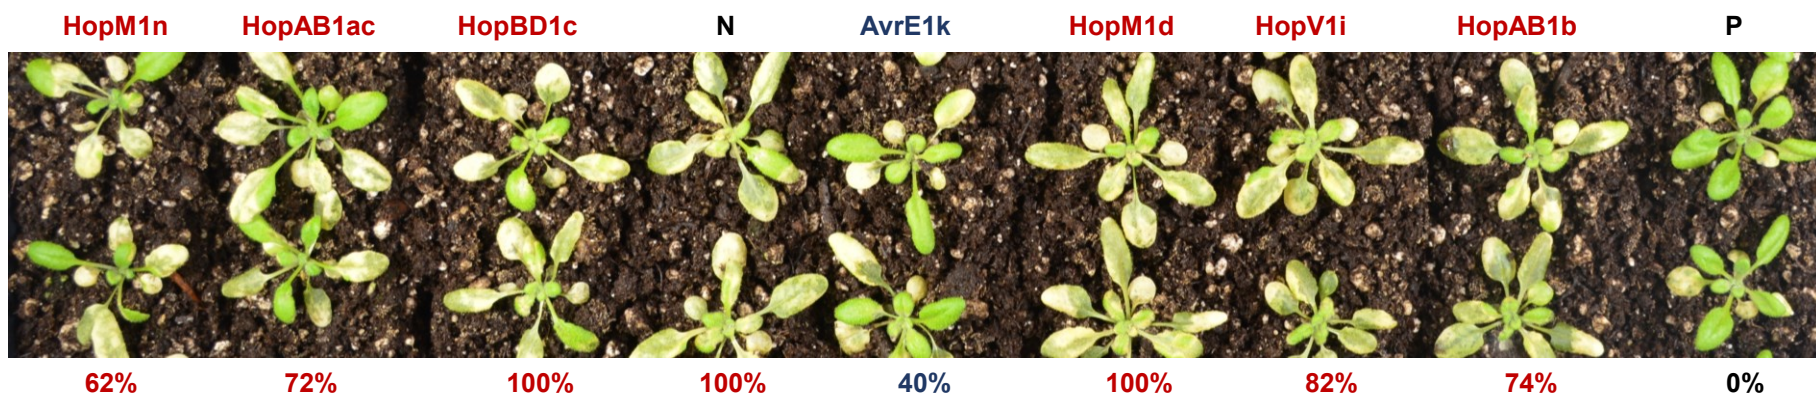

Flat 78

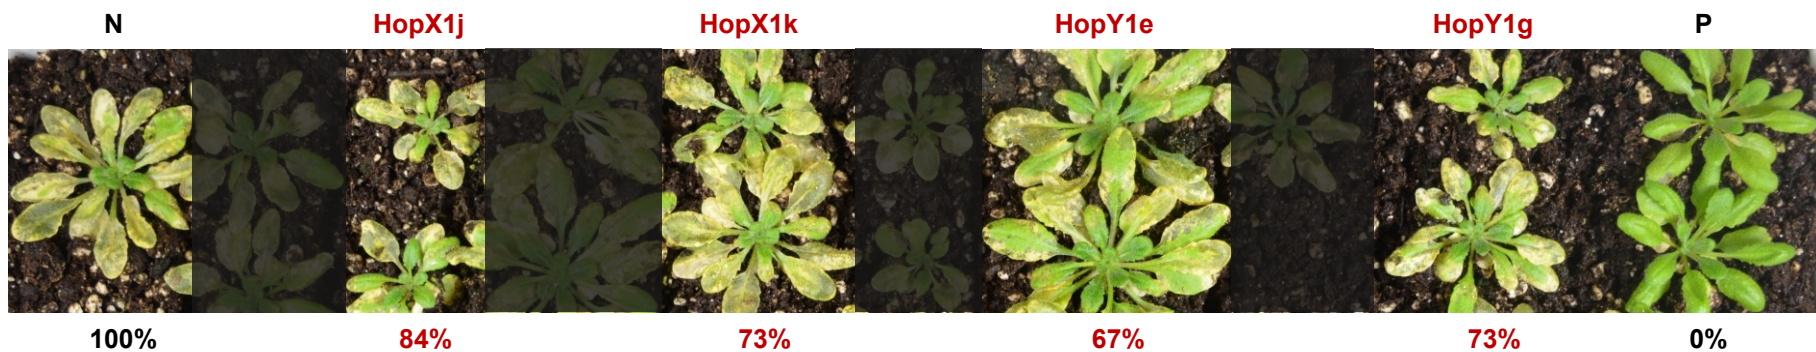

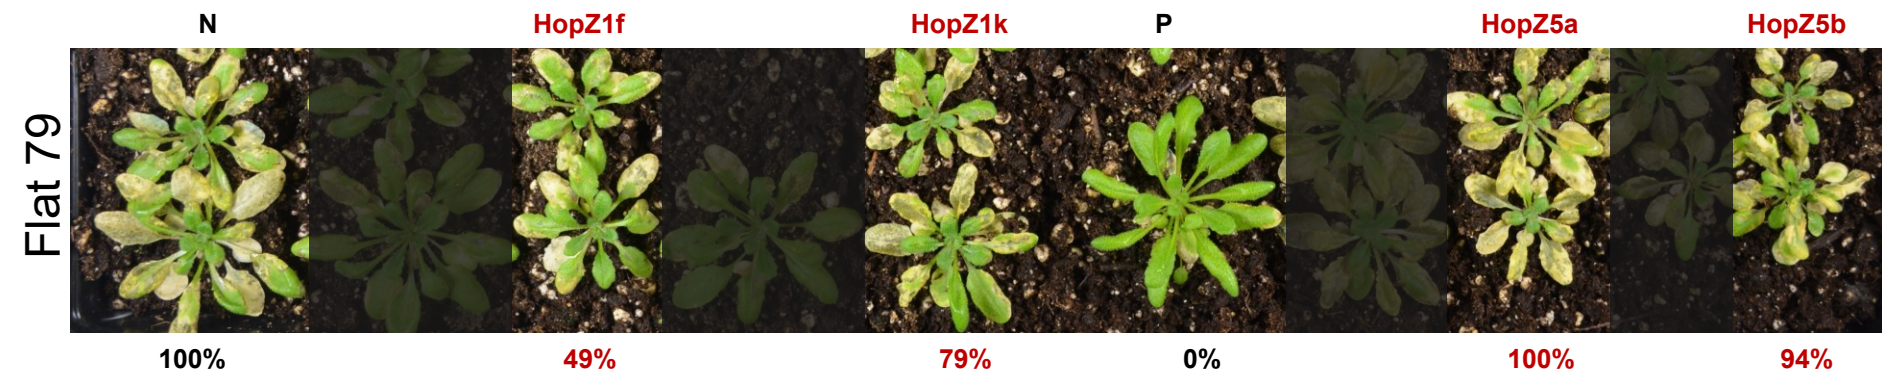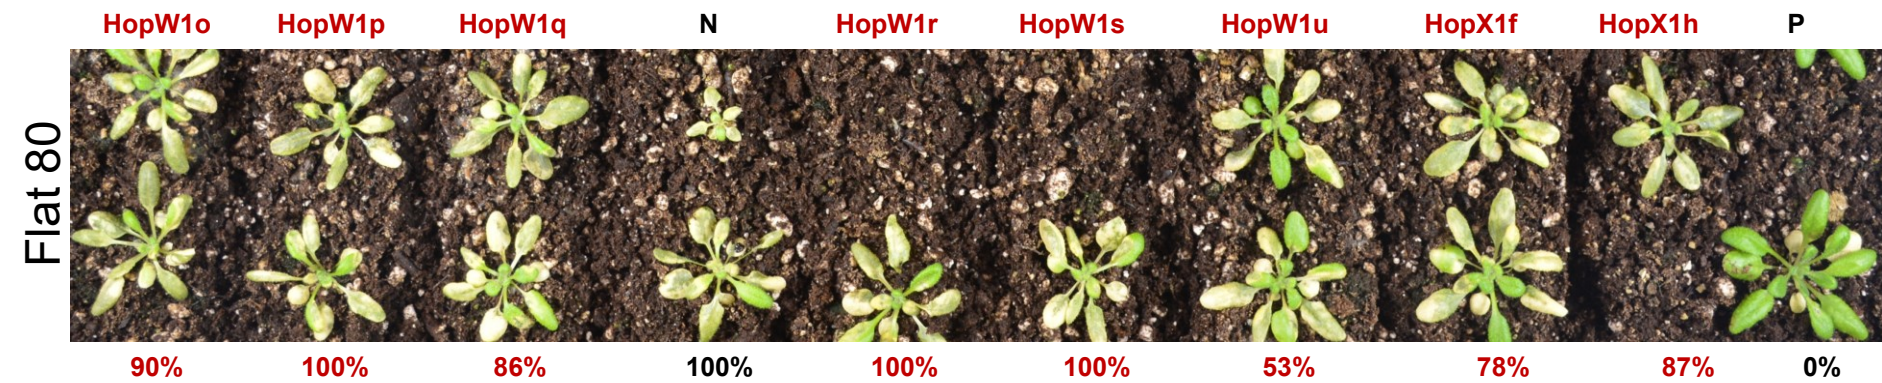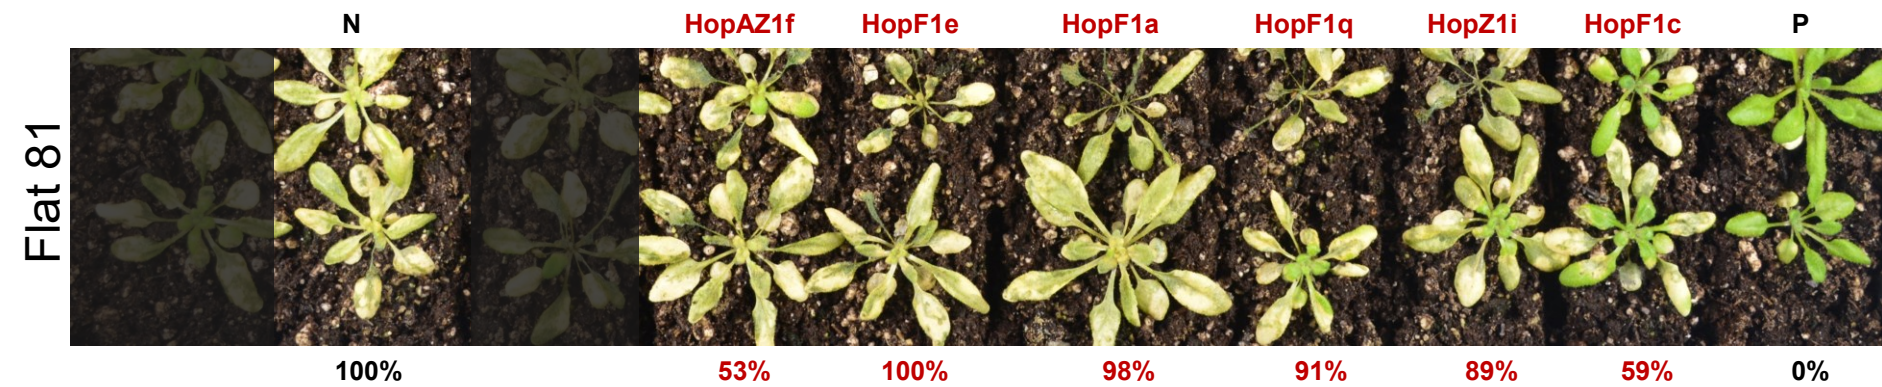

Flat 84

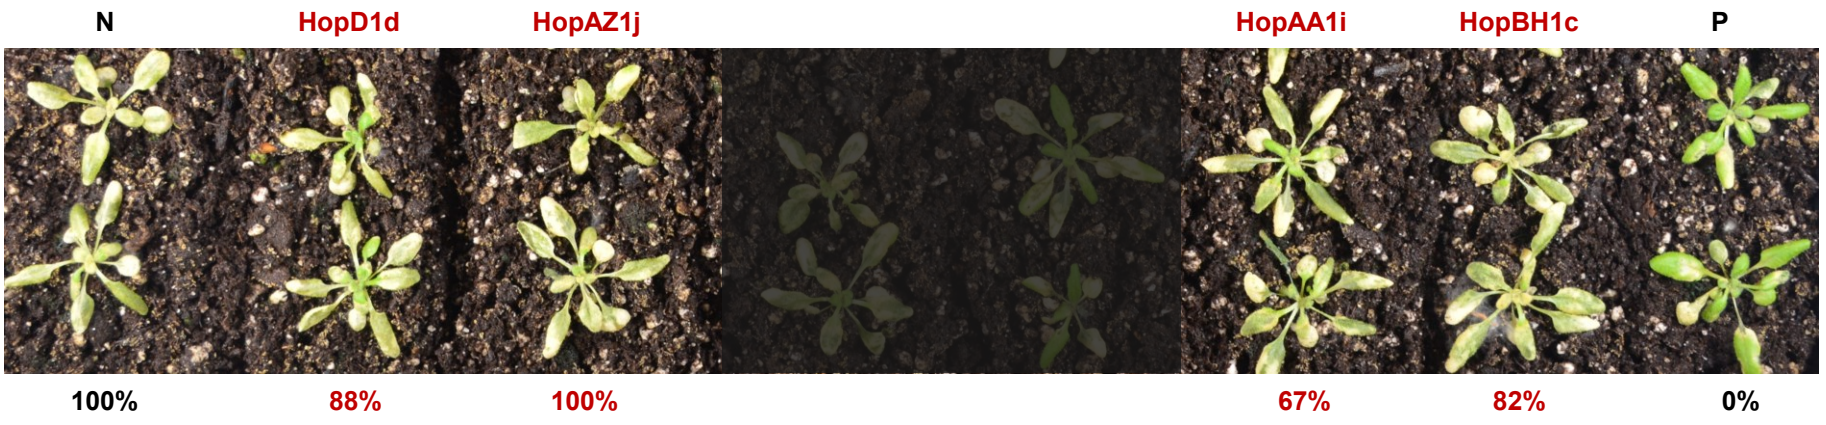

Supplement: ppat.1010541.s006.pdf [file ppat.1010541.s006.pdf]
